# Supplementary material for: Design, synthesis, characterization,in vitroscreening, molecular docking, 3D-QSAR, and ADME-Tox investigations of novel pyrazole derivatives as antimicrobial agents
Source: Royal Society of Chemistry journal article supplement (doi:10.1039/d1nj05621b), 2021-12-20
Supplement: d1nj05621b1.pdf [file d1nj05621b1.pdf]

## Supplementary Information for the paper

### Design, synthesis, characterization, *in vitro* screening, molecular docking, 3D-QSAR, and ADME-Tox investigations of novel pyrazole derivatives as antimicrobial agents

Mohammed Chalkha<sup>a,‡</sup>, Mohamed Akhazzane<sup>ab,‡</sup>, Fatima Zahrae Moussaid<sup>c,‡</sup>, Ossama Daoui<sup>d,‡</sup>, Asmae Nakkabi<sup>a</sup>, Mohamed Bakhouch<sup>ae</sup>, Samir Chtita<sup>\*f</sup>, Souad Elkhattabi<sup>d</sup>, Abdelilah Iraqi Housseini<sup>c</sup>, Mohamed El Yazidi<sup>\*a</sup>

<sup>a</sup>*Engineering Laboratory of Organometallic and Molecular Materials and Environment (LIMOME), Faculty of Sciences Dhar El Mahraz, Sidi Mohamed Ben Abdellah University, P.O. Box 1796 (Atlas), 30000 Fez, Morocco*

<sup>b</sup>*Université Sidi Mohamed Ben Abdellah, Cité de l'innovation, Fès, Maroc*

<sup>c</sup>*Laboratory of Biotechnology, Environment, Agri-Food, and Health (LBEAS), Faculty of Sciences, University Sidi Mohamed Ben Abdellah (USMBA), 30050 Fez, Morocco.*

<sup>d</sup>*Laboratory of Engineering, Systems and Applications, National School of Applied Sciences, Sidi Mohamed Ben Abdellah-Fez University, Fez, Morocco*

<sup>e</sup>*Laboratory of Bioorganic Chemistry, Department of Chemistry, Faculty of Sciences, Chouaïb Doukkali University, P.O. Box 24, 24000 El Jadida, Morocco*

<sup>f</sup>*Laboratory of Analytical and Molecular Chemistry, Faculty of Sciences Ben M'Sik, Hassan II University of Casablanca, B.P. 7955, Casablanca, Morocco*

\*Corresponding authors -E-mail: [elyazidimohamed@hotmail.com](mailto:elyazidimohamed@hotmail.com) (El Yazidi Mohamed), [samirchtita@gmail.com](mailto:samirchtita@gmail.com) (CHTITA Samir)

‡ These authors contributed equally in this collaborative work.

**Table of Contents**

|                                                                                                                  |     |
|------------------------------------------------------------------------------------------------------------------|-----|
| <i>Table S1</i> Physical and spectroscopic characterization data of the synthesized compounds.....               | S3  |
| <i>Figure S1.</i> Plots of experimental and predicted MIC values for the 14 pyrazoles used in CoMFA model.....   | S4  |
| <i>Figure S2.</i> Plots of experimental and predicted MIC values for the 14 pyrazoles used in CoMSIA model ..... | S5  |
| <i>Figure S3.</i> The plot of residuals for the training sets obtained from the CoMFA and CoMSIA models .....    | S5  |
| <i>Table S2</i> Structures and their predicted MIC of newly designed inhibitors based on 3D-QSAR models.....     | S6  |
| <i>Table S3</i> Prediction of drug-likeness for the synthesized 14 compounds and 16 designed ones. ....          | S9  |
| <i>Table S4</i> ADMET properties .....                                                                           | S11 |
| <i>Table S5</i> Summary of molecular docking results.....                                                        | S13 |
| <i>Figure S4.</i> Visualization's 3D and 2D of docking results of the ligands designed. ....                     | S16 |
| 1. Chemical reagents and instruments .....                                                                       | S17 |
| 2. Characterization data of all synthesized pyrazoles ( <b>4-9</b> ).....                                        | S17 |
| 3. Antimicrobial Activity .....                                                                                  | S24 |
| 4. FT-IR, <sup>1</sup> H, <sup>13</sup> C NMR and HRMS spectra of synthesized compounds .....                    | S25 |
| 5. References (cited in SI): .....                                                                               | S65 |

**Table S1** Physical and spectroscopic characterization data of the synthesized compounds.

| N°                    | R                | Time (h) | Formula (M.)                                                                | M.p <sup>b</sup> (°C) | Yield <sup>c</sup> (%) | NMR- <sup>1</sup> H (ppm)                                                               |      | <sup>13</sup> C-NMR (ppm)                                          | IR (cm <sup>-1</sup> ) | HRMS (m/z) [M+H] <sup>+</sup> |
|-----------------------|------------------|----------|-----------------------------------------------------------------------------|-----------------------|------------------------|-----------------------------------------------------------------------------------------|------|--------------------------------------------------------------------|------------------------|-------------------------------|
|                       |                  |          |                                                                             |                       |                        | R <sub>1</sub> / R <sub>2</sub>                                                         | NH   | R <sub>1</sub> and R <sub>2</sub>                                  | NH                     |                               |
| <b>4a</b>             | H                | 4        | C <sub>30</sub> H <sub>25</sub> N <sub>3</sub> O<br>(443.1998)              | 160-162               | 92                     | <u>CH</u> <sub>2</sub> (3.26)<br><u>CH</u> <sub>3</sub> (1.32)                          | 8.72 | <u>CH</u> <sub>2</sub> (37.2)<br><u>CH</u> <sub>3</sub> (14.4)     | 3316                   | 444.2088                      |
| <b>4b</b>             | OCH <sub>3</sub> | 5        | C <sub>31</sub> H <sub>27</sub> N <sub>3</sub> O <sub>2</sub><br>(473.2103) | 146-148               | 84                     | <u>CH</u> <sub>2</sub> (3.26)<br><u>CH</u> <sub>3</sub> (1.32)                          | 8.73 | <u>CH</u> <sub>2</sub> (37.2)<br><u>CH</u> <sub>3</sub> (14.4)     | 3314                   | 474.2180                      |
| <b>5a</b>             | H                | 10       | C <sub>35</sub> H <sub>27</sub> N <sub>3</sub> O<br>(505.2154)              | 170-172               | 70                     | <u>CH</u> <sub>2</sub> (4.51)                                                           | 9.24 | <u>CH</u> <sub>2</sub> (46.4)                                      | 3312                   | 506.2228                      |
| <b>5b</b>             | OCH <sub>3</sub> | 8        | C <sub>36</sub> H <sub>29</sub> N <sub>3</sub> O <sub>2</sub><br>(535.2260) | 188-190               | 88                     | <u>CH</u> <sub>2</sub> (4.51)                                                           | 9.25 | <u>CH</u> <sub>2</sub> (46.4)                                      | 3327                   | 536.2342                      |
| <b>5c</b>             | Cl               | 7        | C <sub>35</sub> H <sub>26</sub> ClN <sub>3</sub> O<br>(539.1764)            | 138-140               | 65                     | <u>CH</u> <sub>2</sub> (4.52)                                                           | 9.25 | <u>CH</u> <sub>2</sub> (46.4)                                      | 3335                   | 540.1845                      |
| <b>5d</b>             | CH <sub>3</sub>  | 9        | C <sub>36</sub> H <sub>29</sub> N <sub>3</sub> O<br>(519.2311)              | 152-154               | 76                     | <u>CH</u> <sub>2</sub> (4.51)                                                           | 9.24 | <u>CH</u> <sub>2</sub> (46.4)                                      | 3300                   | 520.2394                      |
| <b>6a</b>             | H                | 11       | C <sub>31</sub> H <sub>25</sub> N <sub>3</sub> O<br>(455.1998)              | 148-140               | 66                     | <u>CH</u> <sub>2</sub> (3.91)<br><u>HC=C</u> (5.93)<br>C= <u>CH</u> <sub>2</sub> (5.21) | 8.96 | <u>CH</u> <sub>2</sub> (44.7)                                      | 3292                   | 456.2081                      |
| <b>6b</b>             | OCH <sub>3</sub> | 10       | C <sub>32</sub> H <sub>27</sub> N <sub>3</sub> O <sub>2</sub><br>(485.2103) | 146-148               | 73                     | <u>CH</u> <sub>2</sub> (3.9)<br><u>HC=C</u> (5.94)<br>C= <u>CH</u> <sub>2</sub> (5.2)   | 8.96 | <u>CH</u> <sub>2</sub> (44.7)                                      | 3346                   | 486.2181                      |
| <b>6c</b>             | Cl               | 8        | C <sub>31</sub> H <sub>24</sub> ClN <sub>3</sub> O<br>(489.1608)            | 130-132               | 69                     | <u>CH</u> <sub>2</sub> (3.92)<br><u>HC=C</u> (5.94)<br>C= <u>CH</u> <sub>2</sub> (5.23) | 8.97 | <u>CH</u> <sub>2</sub> (44.7)                                      | 3352                   | 490.1697                      |
| <b>7a</b>             | H                | 9        | C <sub>31</sub> H <sub>23</sub> N <sub>3</sub> O<br>(453.1841)              | 178-180               | 57                     | <u>CH</u> <sub>2</sub> (4.03)<br>C≡ <u>CH</u> (2.26)                                    | 8.85 | <u>CH</u> <sub>2</sub> (32.2)<br>C≡C (79.5)<br>C≡ <u>CH</u> (71.5) | 3329                   | 454.1925                      |
| <b>7b</b>             | OCH <sub>3</sub> | 5        | C <sub>32</sub> H <sub>25</sub> N <sub>3</sub> O <sub>2</sub><br>(483.1947) | 170-172               | 68                     | <u>CH</u> <sub>2</sub> (4.03)<br>C≡ <u>CH</u> (2.26)                                    | 8.86 | <u>CH</u> <sub>2</sub> (32.2)<br>C≡C (79.6)<br>C≡ <u>CH</u> (71.5) | 3323                   | 484.2022                      |
| <b>8a</b>             | H                | 2        | C <sub>29</sub> H <sub>23</sub> N <sub>3</sub> O<br>(429.1841)              | 200-202               | 83                     | <u>CH</u> <sub>3</sub> (2.92)                                                           | 8.80 | <u>CH</u> <sub>3</sub> (29.3)                                      | 3316                   | 430.1931                      |
| <b>8b</b>             | OCH <sub>3</sub> | 2.30     | C <sub>30</sub> H <sub>25</sub> N <sub>3</sub> O <sub>2</sub><br>(459.1947) | 176-178               | 89                     | <u>CH</u> <sub>3</sub> (2.92)                                                           | 8.79 | <u>CH</u> <sub>3</sub> (29.3)                                      | 3309                   | 460.2040                      |
| <b>8c</b>             | Cl               | 3        | C <sub>29</sub> H <sub>22</sub> ClN <sub>3</sub> O<br>(463.1451)            | 174-176               | 76                     | <u>CH</u> <sub>3</sub> (2.93)                                                           | 8.81 | <u>CH</u> <sub>3</sub> (29.3)                                      | 3350                   | 464.1540                      |
| <b>8d</b>             | CH <sub>3</sub>  | 1        | C <sub>30</sub> H <sub>25</sub> N <sub>3</sub> O<br>(443.1998)              | 172-174               | 91                     | <u>CH</u> <sub>3</sub> (2.92)                                                           | 8.81 | <u>CH</u> <sub>3</sub> (29.3)                                      | 3318                   | 444.2092                      |
| <b>9a<sup>c</sup></b> | H                | 14       | C <sub>30</sub> H <sub>25</sub> N <sub>3</sub> O<br>(443.1998)              | 180-182               | 55                     | 2 <u>CH</u> <sub>3</sub> (2.67)                                                         | -    | 2 <u>CH</u> <sub>3</sub> (43.9)                                    | -                      | 444.2069                      |
| <b>9b<sup>c</sup></b> | OCH <sub>3</sub> | 13       | C <sub>31</sub> H <sub>27</sub> N <sub>3</sub> O <sub>2</sub><br>(473.2103) | 134-136               | 67                     | 2 <u>CH</u> <sub>3</sub> (2.67)                                                         | -    | 2 <u>CH</u> <sub>3</sub> (44.0)                                    | -                      | 474.2189                      |
| <b>9c<sup>c</sup></b> | Cl               | 17       | C <sub>30</sub> H <sub>24</sub> ClN <sub>3</sub> O<br>(477.1608)            | 164-166               | 59                     | 2 <u>CH</u> <sub>3</sub> (2.67)                                                         | -    | 2 <u>CH</u> <sub>3</sub> (44.1)                                    | -                      | 478.1701                      |
| <b>9d<sup>c</sup></b> | CH <sub>3</sub>  | 12       | C <sub>31</sub> H <sub>27</sub> N <sub>3</sub> O<br>(457.2154)              | 158-160               | 74                     | 2 <u>CH</u> <sub>3</sub> (2.68)                                                         | -    | 2 <u>CH</u> <sub>3</sub> (44.0)                                    | -                      | 458.2250                      |

<sup>a</sup> Reagents and conditions: **3a-d** (1 equiv), R-X (1 equiv), DMF (20 mL), BTBA (0,5 equiv.), NaH (1 equiv), rt.

<sup>b</sup> Isolated yield.

<sup>c</sup> Conditions: **3a-d** (1 equiv), CH<sub>3</sub>I (2 equiv), NaH (2 equiv).

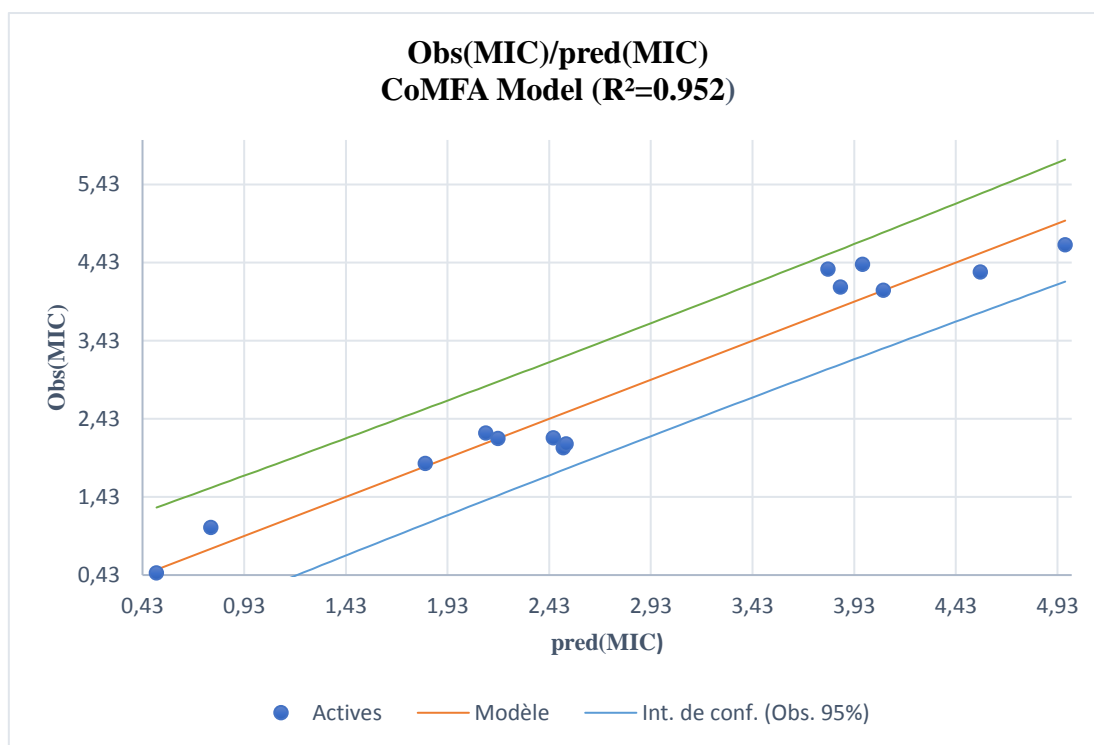

**Figure S1.** Plots of experimental and predicted MIC values for the 14 pyrazoles used in CoMFA model

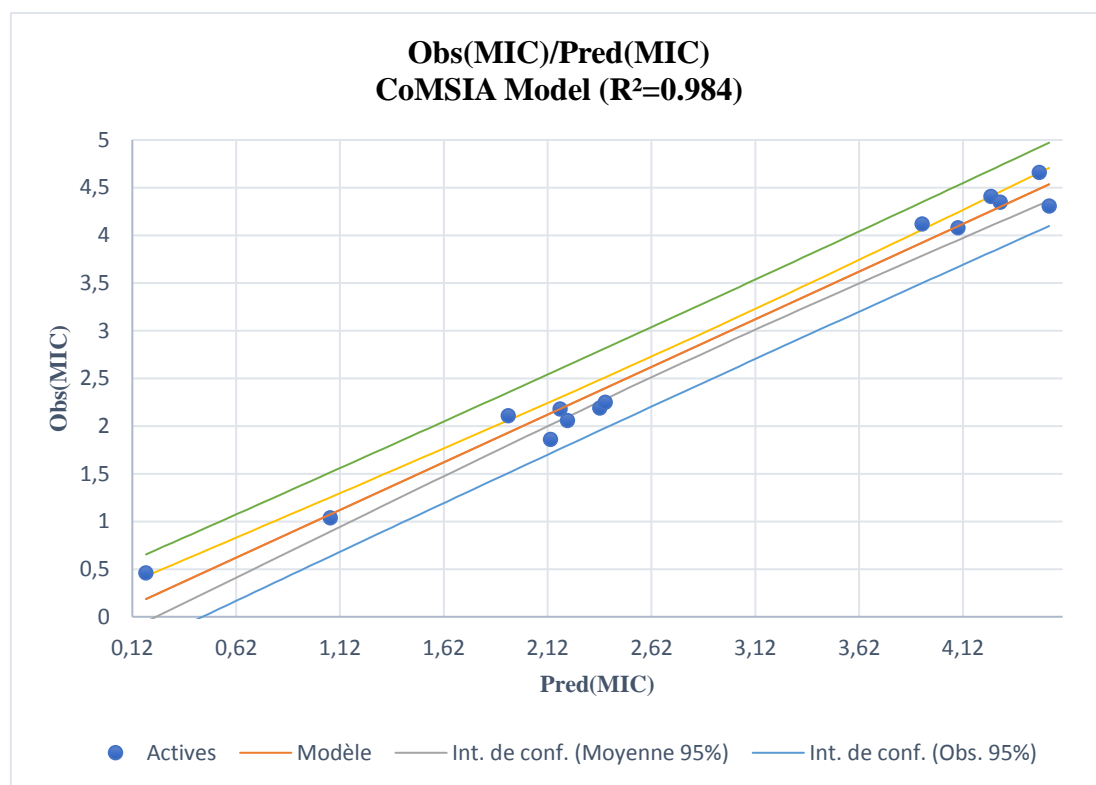

**Figure S2.** Plots of experimental and predicted MIC values for the 14 pyrazoles used in CoMSIA model

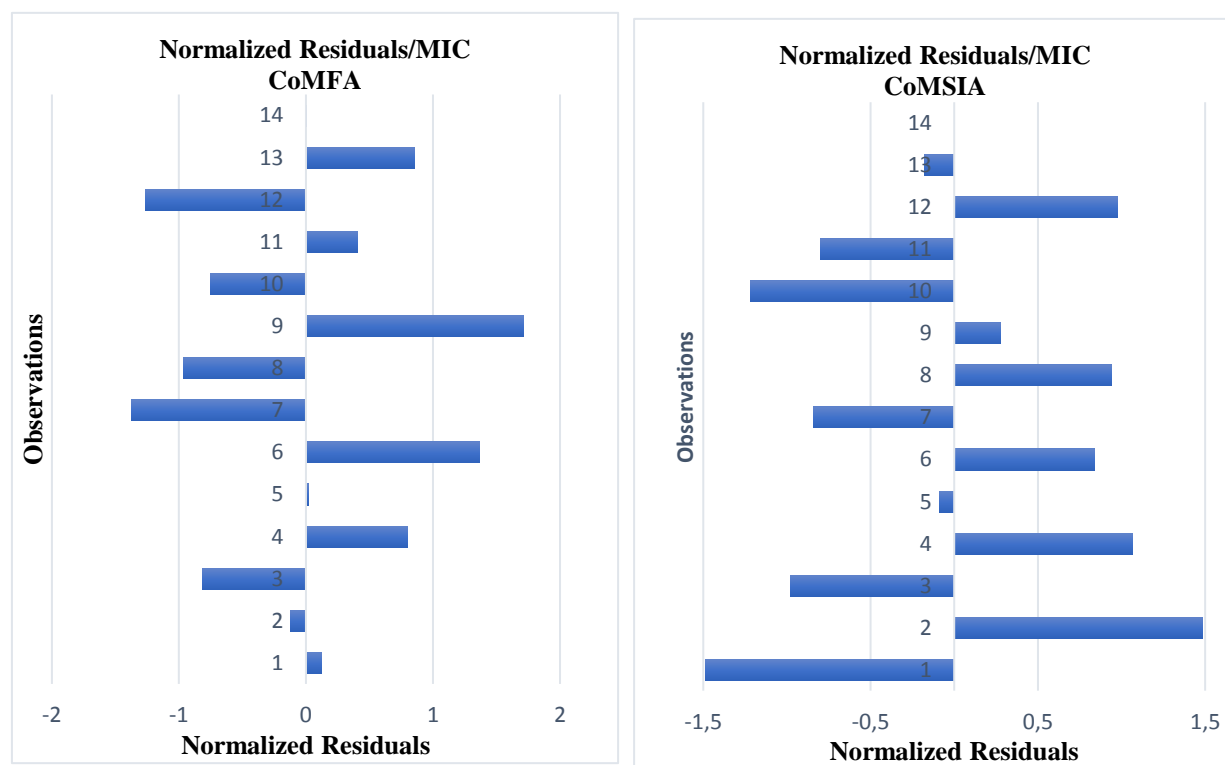

**Figure S3.** The plot of residuals for the training sets obtained from the CoMFA and CoMSIA models

**Table S2** Structures and their predicted MIC of newly designed inhibitors based on 3D-QSAR models.

| References | Structure                                                                           | (Pred MIC)<br>CoMFA | (Pred MIC)<br>CoMSIA |
|------------|-------------------------------------------------------------------------------------|---------------------|----------------------|
| C1         | 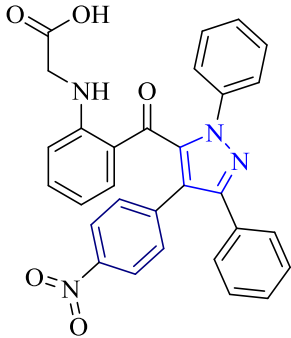   | 1.424               | 2.434                |
| C2         |   | 2.488               | 2.412                |
| C3         |  | 1.636               | 2.172                |
| C4         |  | 2.267               | 3.286                |

|    |                                                                                     |       |       |
|----|-------------------------------------------------------------------------------------|-------|-------|
| C5 | 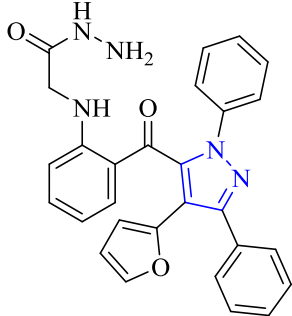   | 1.011 | 2.244 |
| C6 |    | 0.293 | 1.082 |
| C7 |   | 0.816 | 1.092 |
| C8 |  | 1.658 | 2.082 |
| C9 |  | 0.110 | 1.031 |

|     |                                                                                     |       |       |
|-----|-------------------------------------------------------------------------------------|-------|-------|
| C10 | 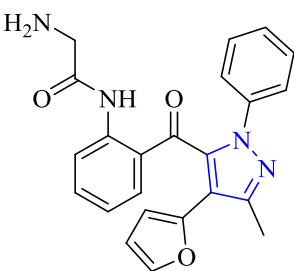   | 1.641 | 2.136 |
| C11 |    | 2.143 | 1.151 |
| C12 |   | 1.630 | 1.158 |
| C13 |  | 1.231 | 1.396 |
| C14 |  | 1.956 | 1.048 |



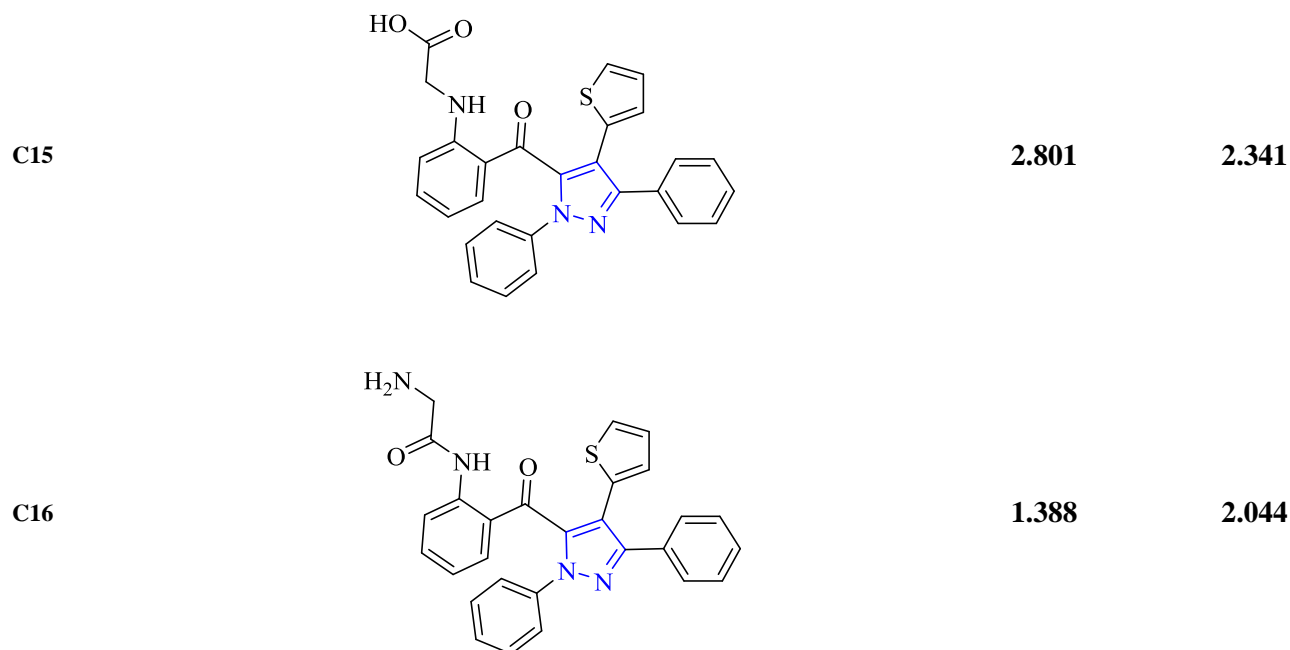

**Table S3** Prediction of drug-likeness for the synthesized 14 compounds and 16 designed ones.

|                              | MW(Da)  | LogP | n-OHNH acceptors | n-OHNH donors | Lipinski's violations | Drug-Like | n-ROTB | TPSA(A <sup>2</sup> ) | Flexibility | S.A      |
|------------------------------|---------|------|------------------|---------------|-----------------------|-----------|--------|-----------------------|-------------|----------|
| Rule                         | <500    | ≤5   | <10              | ≤5            | <2                    | Yes/No    | ≤10    | <140                  | Yes/No      | 0<S.A<10 |
| <b>Synthesized molecules</b> |         |      |                  |               |                       |           |        |                       |             |          |
| 5b                           | 535.647 | 4.55 | 3                | 1             | 1                     | No        | 9      | 46.92                 | Yes         |          |
| 5c                           | 540.066 | 4.78 | 2                | 1             | 1                     | No        | 8      | 56.15                 | Yes         |          |
| 6a                           | 455.561 | 3.85 | 2                | 1             | 0                     | Yes       | 8      | 46.92                 | Yes         |          |
| 6b                           | 485.587 | 4.77 | 3                | 1             | 0                     | Yes       | 9      | 56.15                 | Yes         |          |
| 6c                           | 490.006 | 4.24 | 2                | 1             | 0                     | Yes       | 8      | 46.92                 | Yes         |          |
| 7a                           | 453.545 | 4.16 | 2                | 1             | 0                     | Yes       | 7      | 46.92                 | Yes         |          |
| 7b                           | 483.571 | 4.06 | 3                | 1             | 0                     | Yes       | 8      | 46.92                 | Yes         |          |
| 8a                           | 429.523 | 4.11 | 2                | 1             | 0                     | Yes       | 6      | 56.15                 | Yes         |          |
| 8b                           | 459.549 | 4.28 | 3                | 1             | 0                     | Yes       | 7      | 46.92                 | Yes         |          |
| 8c                           | 463.968 | 3.86 | 2                | 1             | 0                     | Yes       | 6      | 46.92                 | Yes         |          |
| 9a                           | 443.550 | 3.87 | 2                | 0             | 0                     | Yes       | 6      | 56.15                 | Yes         |          |
| 9b                           | 473.576 | 3.92 | 3                | 0             | 0                     | Yes       | 7      | 46.92                 | Yes         |          |
| 9c                           | 477.995 | 4.11 | 2                | 0             | 0                     | Yes       | 6      | 56.15                 | Yes         |          |
| 9d                           | 457.577 | 4.00 | 2                | 0             | 0                     | Yes       | 6      | 46.92                 | Yes         |          |
| <b>Designed molecules</b>    |         |      |                  |               |                       |           |        |                       |             |          |
| C1                           | 518.52  | 2.72 | 6                | 2             | 1                     | Yes       | 9      | 130.04                | Yes         | 4.15     |
| C2                           | 503.55  | 3.71 | 5                | 2             | 1                     | Yes       | 9      | 93.45                 | Yes         | 3.89     |
| C3                           | 489.52  | 3.04 | 5                | 3             | 0                     | Yes       | 8      | 104.45                | Yes         | 3.80     |
| C4                           | 463.48  | 3.27 | 5                | 2             | 0                     | Yes       | 8      | 97.36                 | Yes         | 3.89     |
| C5                           | 477.51  | 3.23 | 5                | 3             | 0                     | Yes       | 9      | 115.18                | Yes         | 4.02     |
| C6                           | 503.55  | 2.80 | 5                | 4             | 1                     | Yes       | 9      | 122.27                | Yes         | 3.95     |
| C7                           | 488.54  | 2.97 | 5                | 3             | 0                     | Yes       | 8      | 110.24                | Yes         | 3.82     |
| C8                           | 462.50  | 3.30 | 5                | 2             | 0                     | Yes       | 8      | 103.15                | Yes         | 3.90     |
| C9                           | 476.53  | 3.49 | 5                | 1             | 0                     | Yes       | 8      | 94.36                 | Yes         | 4.02     |
| C10                          | 400.43  | 2.77 | 5                | 2             | 0                     | Yes       | 7      | 103.15                | Yes         | 3.49     |

|     |        |      |   |   |   |     |   |        |     |      |
|-----|--------|------|---|---|---|-----|---|--------|-----|------|
| C11 | 415.44 | 2.80 | 5 | 3 | 0 | Yes | 8 | 115.18 | Yes | 3.63 |
| C12 | 455.51 | 3.10 | 5 | 3 | 0 | Yes | 9 | 111.27 | Yes | 3.63 |
| C13 | 470.48 | 2.42 | 6 | 3 | 0 | Yes | 9 | 147.86 | No  | 3.63 |
| C14 | 493.58 | 3.29 | 4 | 3 | 0 | Yes | 9 | 130.28 | Yes | 3.95 |
| C15 | 479.55 | 2.68 | 4 | 2 | 0 | Yes | 8 | 112.46 | Yes | 3.82 |
| C16 | 478.56 | 3.33 | 4 | 2 | 0 | Yes | 8 | 118.25 | Yes | 3.83 |

**MW:** Molecular Weight, **MLog P:** logarithm of partition coefficient of compound between n-octanol and water, **n-OHNH acceptors:** Number of hydrogen bond acceptors, **n-OHNH donors:** Number of hydrogen bonds donors, **n-ROTB:** Number of Rotatable Bonds, **S.A:** Synthetic accessibility, **TPSA:** Topological Polar Surface Area.

Table S4 ADMET properties

|                                                  |                               | Properties           |                                   |                  |                  |                      |            |           |      |     |     |                                                      |                      |                      |                                             |              |
|--------------------------------------------------|-------------------------------|----------------------|-----------------------------------|------------------|------------------|----------------------|------------|-----------|------|-----|-----|------------------------------------------------------|----------------------|----------------------|---------------------------------------------|--------------|
|                                                  |                               | Absorption           |                                   | Distribution     |                  |                      | Metabolism |           |      |     |     |                                                      | Excretion            | Toxicity             |                                             |              |
| models                                           | Intestinal absorption (human) | P-Gp substrate       | VDss (human)                      | BBB permeability | CNS permeability | CYP                  |            |           |      |     |     | Total clearance                                      | AMES toxicity        | Skin Sensitisation   | Oral Rat Acute Toxicity (LD <sub>50</sub> ) |              |
|                                                  |                               |                      |                                   |                  |                  | Substrate            |            | Inhibitor |      |     |     |                                                      |                      |                      |                                             |              |
|                                                  |                               |                      |                                   |                  |                  | 2D6                  | 3A4        | 1A2       | 2C19 | 2C9 | 2D6 |                                                      |                      |                      |                                             | 3A4          |
| Unity                                            | Numeric (%absorbed)           | Categorical (yes/no) | Numeric (Log L kg <sup>-1</sup> ) | Numeric (Log BB) | Numeric (Log PS) | Categorical (Yes/No) |            |           |      |     |     | Numeric (log mL min <sup>-1</sup> kg <sup>-1</sup> ) | Categorical (Yes/No) | Categorical (Yes/No) | Numeric (mol/kg)                            |              |
| <b>Predicted values of synthesized molecules</b> |                               |                      |                                   |                  |                  |                      |            |           |      |     |     |                                                      |                      |                      |                                             |              |
| <b>5b</b>                                        | 96.432                        | No                   | -0.848                            | 0.272            | -1.373           | No                   | Yes        | Yes       | No   | No  | No  | No                                                   | 0.600                | No                   | No                                          | <b>2.917</b> |
| <b>5c</b>                                        | 93.336                        | Yes                  | -0.744                            | 0.422            | -0.030           | No                   | Yes        | Yes       | No   | No  | No  | No                                                   | 0.040                | No                   | No                                          | <b>3.107</b> |
| <b>6a</b>                                        | 99.870                        | No                   | -0.755                            | 0.099            | -0.549           | No                   | Yes        | No        | Yes  | Yes | No  | No                                                   | 0.685                | No                   | No                                          | <b>3.881</b> |
| <b>6b</b>                                        | 96.278                        | No                   | -0.985                            | 0.171            | -1.646           | No                   | Yes        | No        | Yes  | Yes | No  | Yes                                                  | 0.669                | No                   | No                                          | <b>4.148</b> |
| <b>6c</b>                                        | 94.430                        | No                   | -0.918                            | 0.299            | -0.599           | No                   | Yes        | No        | Yes  | Yes | No  | Yes                                                  | 0.204                | No                   | No                                          | <b>4.006</b> |
| <b>7a</b>                                        | 100                           | Yes                  | -0.788                            | -0.146           | -0.141           | No                   | Yes        | No        | Yes  | Yes | No  | No                                                   | 0.563                | No                   | No                                          | <b>3.89</b>  |
| <b>7b</b>                                        | 97.554                        | No                   | -1.009                            | 0.195            | -1.662           | No                   | Yes        | No        | Yes  | Yes | No  | No                                                   | 0.615                | No                   | No                                          | <b>4.16</b>  |
| <b>8a</b>                                        | 99.723                        | No                   | -0.758                            | 0.163            | -0.508           | No                   | Yes        | No        | Yes  | Yes | No  | Yes                                                  | 0.625                | No                   | No                                          | <b>2.932</b> |
| <b>8b</b>                                        | 100                           | No                   | -0.820                            | -0.236           | -0.236           | No                   | Yes        | No        | Yes  | Yes | No  | No                                                   | 0.657                | No                   | No                                          | <b>2.747</b> |
| <b>8c</b>                                        | 98.176                        | Yes                  | -0.756                            | 0.132            | -0.506           | No                   | Yes        | No        | Yes  | Yes | No  | No                                                   | 0.150                | No                   | No                                          | <b>3.047</b> |
| <b>9a</b>                                        | 100                           | No                   | -0.766                            | 0.283            | -0.796           | No                   | Yes        | No        | Yes  | Yes | No  | Yes                                                  | 0.694                | No                   | No                                          | <b>2.885</b> |
| <b>9b</b>                                        | 99.089                        | No                   | -0.752                            | 0.307            | -0.801           | No                   | Yes        | No        | Yes  | Yes | No  | No                                                   | 0.734                | No                   | No                                          | <b>2.648</b> |
| <b>9c</b>                                        | 100                           | No                   | -0.769                            | 0.224            | -0.845           | No                   | Yes        | No        | Yes  | Yes | No  | No                                                   | 0.209                | No                   | No                                          | <b>3.034</b> |
| <b>9d</b>                                        | 100                           | No                   | -0.772                            | 0.237            | -0.845           | No                   | Yes        | No        | Yes  | Yes | No  | No                                                   | 0.697                | No                   | No                                          | <b>3.028</b> |
| <b>Predicted values of designed molecules</b>    |                               |                      |                                   |                  |                  |                      |            |           |      |     |     |                                                      |                      |                      |                                             |              |
| Unity                                            | Numeric (%absorbed)           | Categorical (yes/no) | Numeric (Log L kg <sup>-1</sup> ) | Numeric (Log BB) | Numeric (Log PS) | Categorical (Yes/No) |            |           |      |     |     | Numeric (log mL min <sup>-1</sup> kg <sup>-1</sup> ) | Categorical (Yes/No) | Categorical (Yes/No) | Numeric (mol/kg)                            |              |
| <b>C1</b>                                        | 100                           | No                   | -1.300                            | -1.407           | -2.215           | No                   | Yes        | Yes       | No   | No  | No  | No                                                   | 0.748                | No                   | No                                          | 2.565        |

|            |        |     |        |        |        |     |     |     |     |     |     |     |       |     |    |       |
|------------|--------|-----|--------|--------|--------|-----|-----|-----|-----|-----|-----|-----|-------|-----|----|-------|
| <b>C2</b>  | 82     | Yes | -1.348 | -1.128 | -2.117 | No  | Yes | No  | No  | Yes | No  | No  | 0.383 | No  | No | 2.840 |
| <b>C3</b>  | 77.581 | Yes | -1.387 | -1.417 | -2.148 | No  | Yes | Yes | No  | Yes | No  | No  | 0.328 | No  | No | 2.509 |
| <b>C4</b>  | 82     | Yes | -0.911 | -1.062 | -1.962 | Yes | Yes | Yes | No  | Yes | No  | No  | 0.373 | No  | No | 2.506 |
| <b>C5</b>  | 92     | Yes | -0.68  | -1.396 | -2.304 | Yes | Yes | No  | Yes | Yes | No  | No  | 0.312 | No  | No | 2.560 |
| <b>C6</b>  | 87     | Yes | -1.305 | -1.403 | -2.489 | No  | Yes | No  | Yes | Yes | No  | No  | 0.178 | No  | No | 2.567 |
| <b>C7</b>  | 94     | Yes | 1.303  | -1.199 | -2.144 | No  | Yes | Yes | No  | Ye  | No  | No  | 0.315 | No  | No | 2.644 |
| <b>C8</b>  | 99     | Yes | -0.595 | -1.028 | -1.958 | No  | Yes | Yes | Yes | No  | Yes | No  | 0.514 | No  | No | 2.537 |
| <b>C9</b>  | 100    | Yes | -0.261 | -1.018 | -1.893 | No  | Yes | No  | Yes | No  | No  | No  | 0.433 | No  | No | 2.262 |
| <b>C10</b> | 92     | Yes | 0.318  | -0.945 | -2.25  | No  | Yes | Yes | No  | No  | No  | Yes | 0.671 | No  | No | 2.666 |
| <b>C11</b> | 86     | Yes | -0.298 | -1.361 | -2.595 | Yes | Yes | Yes | Yes | Yes | No  | Yes | 0.291 | Yes | No | 2.271 |
| <b>C12</b> | 88     | Yes | -0.96  | -1.362 | -2.738 | No  | Yes | No  | Yes | Yes | No  | Yes | 0.281 | Yes | No | 2.774 |
| <b>C13</b> | 83     | Yes | -1.273 | -1.372 | -2.733 | No  | Yes | No  | Yes | Yes | No  | Yes | 0.359 | Yes | No | 2.575 |
| <b>C14</b> | 94     | Yes | -1.111 | -1.349 | -2.306 | Yes | Yes | No  | Yes | Yes | No  | No  | 0.027 | No  | No | 2.554 |
| <b>C15</b> | 96     | Yes | -1.253 | -1.06  | -1.965 | No  | Yes | No  | No  | Yes | No  | No  | 0.184 | No  | No | 2.504 |
| <b>C16</b> | 97     | Yes | -1.086 | -1.024 | -1.961 | No  | Yes | No  | Yes | No  | Yes | No  | 0.562 | No  | No | 2.265 |

**Table S5** Summary of molecular docking results

| <b>Ligands</b>      | <b>Binding energy (kcal/mol)</b> | <b>Hydrogen-Bonding Interaction</b>                                      | <b>Electrostatic Interaction</b> | <b>Hydrophobic Interaction</b>              |
|---------------------|----------------------------------|--------------------------------------------------------------------------|----------------------------------|---------------------------------------------|
| <b>5c</b>           | <b>-9.2</b>                      | <b>SER31 and TYR32</b>                                                   | <b>LYS243</b>                    | <b>LEU291, VAL292, VAL36, TYR22, PHE118</b> |
| <b>C1</b>           | -8.8                             | ARG167, LEU291 and TYR124                                                | ASP121                           | PHE118, VAL292 and TYR124                   |
| <b>C2</b>           | -8.9                             | TYR32, SER31, GLU29, LYS243 and TYR22                                    | -                                | LEU291, VAL326 and VAL292                   |
| <b>C3</b>           | -8.9                             | TYR32, SER31 and LYS243                                                  | -                                | LEU291, VAL326 and VAL292                   |
| <b>C4</b>           | -9.0                             | TYR32, SER31 and LYS243                                                  | -                                | LEU291, VAL326, TYR32 and VAL292            |
| <b>C5</b>           | <b>-9.2</b>                      | TYR32, SER31 and LYS243                                                  | -                                | LEU291, VAL326 and VAL292                   |
| <b>C6</b>           | <b>-9.2</b>                      | TYR32, SER31, GLU29 and LYS243                                           | -                                | LEU291, VAL326, TYR32 and VAL292            |
| <b>C7</b>           | <b>-9.2</b>                      | TYR32 and SER31                                                          | -                                | LEU291, VAL326, TYR32 and VAL292            |
| <b>C8</b>           | <b>-9.2</b>                      | TYR32, SER31 and <b>GLY327</b>                                           | -                                | LEU291, VAL326, TYR32 and VAL292            |
| <b>C9</b>           | -8.3                             | LEU291                                                                   | -                                | TYR32, VAL326, ILE318, VAL292 and PRO239    |
| <b>C10</b>          | -8.2                             | TYR32 and <b>GLY327</b>                                                  | ASP121                           | VAL292, VAL326, LEU291 and TYR32            |
| <b>C14</b>          | <b>-9.2</b>                      | LYS243, SER31 and TYR32                                                  | -                                | TYR32, VAL292, VAL326 and LEU291            |
| <b>C15</b>          | -8.8                             | SER31, <b>LYS243</b> and TYR32                                           | -                                | TYR32, <b>VAL292</b> , VAL326 and LEU291    |
| <b>C16</b>          | -9.0                             | TYR32, <b>SER31</b> and <b>GLY327</b>                                    | -                                | LEU291, VAL326, TYR32 and <b>VAL292</b>     |
| <b>Ampicillin</b>   | -7.6                             | <b>SER31, GLY327, LYS243, THR241</b>                                     | -                                | <b>TYR124 and Val292</b>                    |
| <b>Streptomycin</b> | -9.1                             | ALA123, ASP113, PRO116, LEU115, <b>GLU117</b> , GLU119, GLU33 and ARG132 | -                                | TYR40                                       |

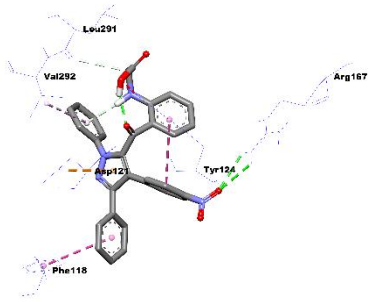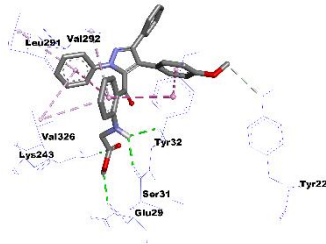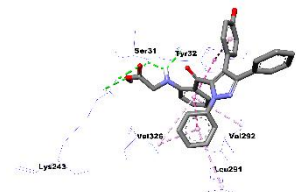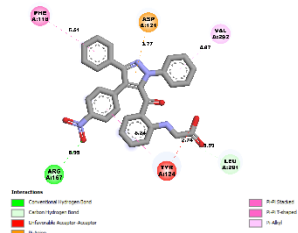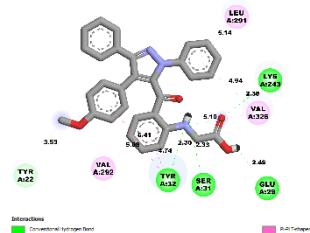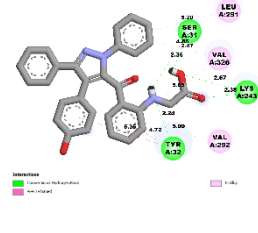

C1-protein

C2-protein

C3-protein

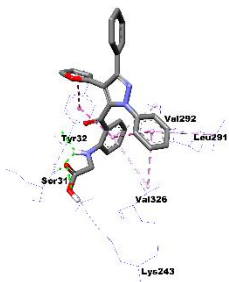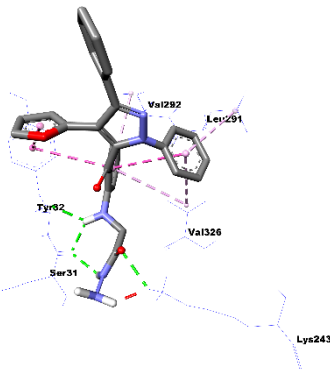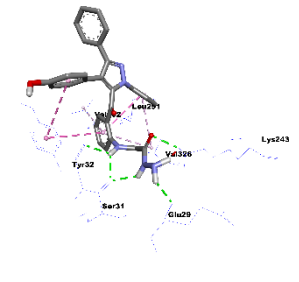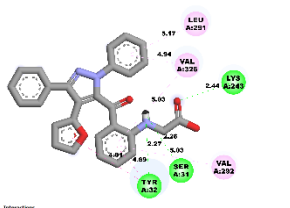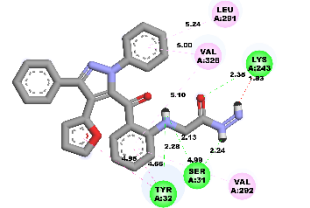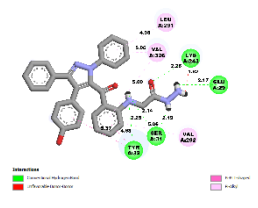

C4-protein

C5-protein

C6-protein







## 1. Chemical reagents and instruments

All chemicals used were of analytical grade and were used without further purification and were purchased from commercial suppliers. The progress of the reactions was monitored by TLC (Merck, silica gel 60 F254), and spots were visualized under UV light (VILBER LOURMAT, VL-215.LC). Column chromatography was performed using Merck silica gel (70-230 mesh) and n-hexane / diethyl ether mixture as eluent. The melting points were determined with an uncertainty of  $\pm 2$  °C using a KOFER BENCH. The IR spectra were recorded in the range of 450–4000  $\text{cm}^{-1}$  on a BRUKER VERTEX 70 FT-IR Spectrometer, and wavenumbers are given in  $\text{cm}^{-1}$ . The NMR spectra ( $^1\text{H}$  and  $^{13}\text{C}$ ) were recorded at room temperature on a BRUKER AVANCE II 300 Ultra-Shield (300 MHz for  $^1\text{H}$  and 75 MHz for  $^{13}\text{C}$ ) spectrometer using  $\text{CDCl}_3$  as solvent. For the  $^{13}\text{C}$  NMR spectra, the APT experiment was used, which provide information on the multiplicity of the  $^{13}\text{C}$  signals ( $\text{CH}_3$ ,  $\text{CH}_2$ ,  $\text{CH}$  and  $\text{C}_q$ ). In these spectra, the negative signals correspond to the  $\text{CH}_3$  and  $\text{CH}$  carbons and the positive signals correspond to the  $\text{CH}_2$  and quaternary C carbons. The chemical displacements are expressed in ppm and the coupling constants  $J$  are expressed in Hertz (Hz). The spin multiplicities are reported as singlet (s), doublet (d), triplet (t), multiplet (m), doublet of doublets (dd), doublet of triplets (dt) and broad (br). High-resolution mass spectra were recorded on a Waters/Vion IMS-QTOF: Spectrometer–, equipped with an electrospray ionization (ESI), source operating in either positive and negative ion mode.

## 2. Characterization data of all synthesized pyrazoles (4-9)

### a) 5-(2-ethylaminobenzoyl)-1,3,4-triphenyl-1H pyrazole (4a)

Yield (92 %); m.p.: 160-162 °C; FT-IR ( $\nu_{\text{max}}$ ,  $\text{cm}^{-1}$ ): 3316 (N-H), 3075, 3054 and 3032 (C-H aromatic), 2958, 2920 and 2866 (C-H aliphatic), 1613 ( $>\text{C}=\text{O}$ ), 1575 ( $>\text{C}=\text{N}$ , pyrazole ring), 1515, 1499 ( $>\text{C}=\text{C}<$ , aromatic ring), 1455, 1427 (C-N<);  $^1\text{H}$  NMR (300 MHz,  $\text{CDCl}_3$ ) ( $\delta/\text{ppm}$ ): 1.32 (t, 3H,  $-\text{CH}_3$ ,  $J = 7.2$  Hz), 3.22-3.31 (m, 2H,  $-\text{CH}_2-$ ), 6.27-6.33 (m, 1H, Ar- $\underline{\text{H}}$ ), 6.61 (d, 1H, Ar- $\underline{\text{H}}$ ,  $J = 8.7$  Hz), 7.19-7.39 (m, 13H, Ar- $\underline{\text{H}}$ ), 7.53-7.59 (m, 4H, Ar- $\underline{\text{H}}$ ), 8.72 (t, 1H, N- $\underline{\text{H}}$ ,  $J = 4.8$  Hz);  $^{13}\text{C}$  NMR (75 MHz,  $\text{CDCl}_3$ ) ( $\delta/\text{ppm}$ ): 14.4 ( $\underline{\text{C}}\text{H}_3$ ), 37.2 ( $\underline{\text{C}}\text{H}_2$ ), 111.3, 114.1, 117.5, 122.1, 123.6, 127.0, 127.5, 127.9, 128.2, 128.4, 129.1, 129.9, 131.9, 132.5, 134.7, 136.0, 139.8, 139.9 ( $>\underline{\text{C}}-\text{N}<$ ), 149.8 ( $>\underline{\text{C}}=\text{N}-$ ), 151.7 ( $>\underline{\text{C}}-\text{NH}-$ ), 190.3 ( $>\underline{\text{C}}=\text{O}$ ); ESI-QTOF-MS (m/z): mass calculated for  $[\text{C}_{30}\text{H}_{25}\text{N}_3\text{O} + \text{H}]^+$ : 444.20855, found: 444.20888.

### b) 5-(2-ethylaminobenzoyl)-4-(4-methoxyphenyl)-1,3-diphenyl-1H-pyrazole (4b)

Yield (84 %); m.p.: 146-148 °C; FT-IR ( $\nu_{\max}$ ,  $\text{cm}^{-1}$ ): 3314 (N-H), 3060 (C-H aromatic), 2969, 2936, 2873 and 2836 (C-H aliphatic), 1618 ( $>\text{C}=\text{O}$ ), 1568 ( $>\text{C}=\text{N}$ , pyrazole ring), 1498 ( $>\text{C}=\text{C}<$ , aromatic ring), 1458 and 1426 (C-N<), 1245 (C-O);  $^1\text{H}$  NMR (300 MHz,  $\text{CDCl}_3$ ) ( $\delta/\text{ppm}$ ): 1.33 (t, 3H,  $-\text{CH}_3$ ,  $J = 7.2$  Hz), 3.22-3.31 (m, 2H,  $-\text{CH}_2-$ ), 3.76 (s, 3H,  $-\text{OCH}_3$ ), 6.29-6.34 (m, 1H, Ar-**H**), 6.61 (d, 1H, Ar-**H**,  $J = 8.7$  Hz), 6.76 (d, 2H, Ar-**H**,  $J = 8.7$  Hz), 7.13-7.20 (m, 2H, Ar-**H**), 7.22-7.38 (m, 8H, Ar-**H**), 7.52-7.60 (m, 4H, Ar-**H**), 8.73 (t, 1H, N-**H**,  $J = 4.8$  Hz);  $^{13}\text{C}$  NMR (75 MHz,  $\text{CDCl}_3$ ) ( $\delta/\text{ppm}$ ): 14.4 ( $\underline{\text{C}}\text{H}_3$ ), 37.2 ( $\underline{\text{C}}\text{H}_2$ ), 55.1 ( $-\text{O}\underline{\text{C}}\text{H}_3$ ), 111.3, 113.7, 114.1, 117.5, 121.8, 123.5, 124.1, 127.5, 127.8, 128.2, 128.4, 129.1, 131.0, 132.7, 134.7, 136.0, 139.8, 139.9 ( $>\underline{\text{C}}-\text{N}<$ ), 149.8 ( $>\underline{\text{C}}=\text{N}-$ ), 151.7 ( $>\underline{\text{C}}-\text{NH}-$ ), 158.6 ( $>\underline{\text{C}}-\text{OCH}_3$ ), 190.5 ( $>\underline{\text{C}}=\text{O}$ ); ESI-QTOF-MS ( $m/z$ ): mass calculated for  $[\text{C}_{31}\text{H}_{27}\text{N}_3\text{O}_2 + \text{H}]^+$ : 474.21785, found: 474.21800.

**c) 5-(2-benzylaminobenzoyl)-1,3,4-triphenyl-1H-pyrazole (5a)**

Yield (70 %); m.p.: 170-172 °C; FT-IR ( $\nu_{\max}$ ,  $\text{cm}^{-1}$ ): 3312 (N-H), 3083, 3056 and 3031 (C-H aromatic), 2916 and 2852 (C-H aliphatic), 1613 ( $>\text{C}=\text{O}$ ), 1569 ( $>\text{C}=\text{N}$ , pyrazole ring), 1515 and 1496 ( $>\text{C}=\text{C}<$ , aromatic ring), 1428 (C-N<);  $^1\text{H}$  NMR (300 MHz,  $\text{CDCl}_3$ ) ( $\delta/\text{ppm}$ ): 4.51 (d, 2H,  $-\text{CH}_2-$ ,  $J = 5.7$  Hz), 6.31-6.36 (m, 1H, Ar-**H**), 6.55 (d, 1H, Ar-**H**,  $J = 8.7$  Hz), 7.14-7.41 (m, 18H, Ar-**H**), 7.56-7.61 (m, 4H, Ar-**H**), 9.24 (t, 1H, N-**H**,  $J = 5.7$  Hz, exchangeable with  $\text{D}_2\text{O}$ );  $^{13}\text{C}$  NMR (75 MHz,  $\text{CDCl}_3$ ) ( $\delta/\text{ppm}$ ): 46.4 ( $\underline{\text{C}}\text{H}_2$ ), 112.0, 114.9, 118.2, 122.3, 123.7, 126.8, 127.2, 127.3, 127.8, 128.0, 128.4, 128.5, 128.7, 129.2, 129.9, 131.8, 132.5, 134.6, 136.1, 136.4, 138.2, 139.8, 140.0 ( $>\underline{\text{C}}-\text{N}<$ ), 149.9 ( $>\underline{\text{C}}=\text{N}-$ ), 151.5 ( $>\underline{\text{C}}-\text{NH}-$ ), 190.7 ( $>\underline{\text{C}}=\text{O}$ ); ESI-QTOF-MS ( $m/z$ ): mass calculated for  $[\text{C}_{35}\text{H}_{27}\text{N}_3\text{O} + \text{H}]^+$ : 506.22281, found: 506.22288.

**d) 5-(2-benzylaminobenzoyl)-4-(4-methoxyphenyl)-1,3-diphenyl-1H-pyrazole (5b)**

Yield (88 %); m.p.: 188-190 °C; FT-IR ( $\nu_{\max}$ ,  $\text{cm}^{-1}$ ): 3313 (N-H), 3059, 3027 (C-H aromatic), 2931 and 2834 (C-H aliphatic), 1621 ( $>\text{C}=\text{O}$ ), 1563 ( $>\text{C}=\text{N}$ , pyrazole ring), 1492 ( $>\text{C}=\text{C}<$ , aromatic ring), 1446 (C-N<), 1236 (C-O);  $^1\text{H}$  NMR (300 MHz,  $\text{CDCl}_3$ ) ( $\delta/\text{ppm}$ ): 3.77 (s, 3H,  $-\text{OCH}_3$ ), 4.51 (d, 2H,  $-\text{CH}_2-$ ,  $J = 6$  Hz), 6.32-6.38 (m, 1H, Ar-**H**), 6.62-6.65 (m, 2H, Ar-**H**), 7.08-7.28 (m, 9H, Ar-**H**), 7.30-7.40 (m, 12H, Ar-**H**), 9.25 (t, 1H, N-**H**,  $J = 5.7$  Hz);  $^{13}\text{C}$  NMR (75 MHz,  $\text{CDCl}_3$ ) ( $\delta/\text{ppm}$ ): 46.4 ( $\underline{\text{C}}\text{H}_2$ ), 55.0 ( $-\text{O}\underline{\text{C}}\text{H}_3$ ), 111.9, 114.8, 118.2, 123.6, 125.5, 126.8, 127.2, 128.2, 128.3, 128.4, 128.7, 128.7, 129.1, 131.0, 131.9, 136.5, 138.2, 139.8, 140.0, 140.1 ( $>\underline{\text{C}}-\text{N}<$ ), 149.9 ( $>\underline{\text{C}}=\text{N}-$ ), 151.5 ( $>\underline{\text{C}}-\text{NH}-$ ), 158.7 ( $>\underline{\text{C}}-\text{OCH}_3$ ), 190.0 ( $>\underline{\text{C}}=\text{O}$ ); ESI-QTOF-MS ( $m/z$ ): mass calculated for  $[\text{C}_{31}\text{H}_{27}\text{N}_3\text{O}_2\text{H}]^+$ : 536.2335, found: 536.2342.

**e) 5-(2-benzylaminobenzoyl)-4-(4-chlorophenyl)-1,3-diphenyl-1H-pyrazole (5c)**

Yield (65 %); m.p.: 138-140 °C; FT-IR ( $\nu_{\max}$ ,  $\text{cm}^{-1}$ ): 3335 (N-H), 3027 (C-H aromatic), 2915 and 2855 (C-H aliphatic), 1619 ( $>\text{C}=\text{O}$ ), 1572 ( $>\text{C}=\text{N}$ , pyrazole ring), 1512 and 1494 ( $>\text{C}=\text{C}<$ , aromatic ring), 1428 (C-N<), 757 (C-Cl);  $^1\text{H}$  NMR (300 MHz,  $\text{CDCl}_3$ ) ( $\delta/\text{ppm}$ ): 4.52 (d, 2H,  $-\text{CH}_2-$ ,  $J = 6$  Hz), 6.33-6.39 (m, 1H, Ar-**H**), 6.59 (d, 1H, Ar-**H**,  $J = 8.4$  Hz), 7.16-7.29 (m, 5H, Ar-**H**), 7.31-7.41 (m, 12H, Ar-**H**), 7.55-7.60 (m, 4H, Ar-**H**), 9.25 (t, 1H, N-**H**,  $J = 5.7$  Hz, exchangeable with  $\text{D}_2\text{O}$ );  $^{13}\text{C}$  NMR (75 MHz,  $\text{CDCl}_3$ ) ( $\delta/\text{ppm}$ ): 46.4 (**CH**<sub>2</sub>), 112.1, 114.9, 118.1, 120.9, 123.6, 126.8, 127.3, 127.8, 128.1, 128.4, 128.4, 128.6, 128.7, 129.1, 131.1, 132.2, 133.1, 134.4, 136.2, 138.1, 139.7, 140.0 ( $>\text{C}-\text{N}<$ ), 149.8 ( $>\text{C}=\text{N}-$ ), 151.6 ( $>\text{C}-\text{NH}-$ ), 190.5 ( $>\text{C}=\text{O}$ ); ESI-QTOF-MS ( $m/z$ ): mass calculated for  $[\text{C}_{35}\text{H}_{26}\text{ClN}_3\text{O} + \text{H}]^+$ : 540.18507, found: 540.18457.

**f) 5-(2-benzylaminobenzoyl)-1,3-diphenyl-4-(p-tolyl)-1H-pyrazole (5d)**

Yield (76 %); m.p.: 152-154 °C; FT-IR ( $\nu_{\max}$ ,  $\text{cm}^{-1}$ ): 3300 (N-H), 3061 and 3028 (C-H aromatic), 2917 and 2859 (C-H aliphatic), 1617 ( $>\text{C}=\text{O}$ ), 1573 ( $>\text{C}=\text{N}$ , pyrazole ring), 1519 and 1496 ( $>\text{C}=\text{C}<$ , aromatic ring), 1428 (C-N<);  $^1\text{H}$  NMR (300 MHz,  $\text{CDCl}_3$ ) ( $\delta/\text{ppm}$ ): 2.31 (s, 3H,  $-\text{CH}_3$ ), 4.51 (d, 2H,  $-\text{CH}_2-$ ,  $J = 6$  Hz), 6.34-6.35 (m, 1H, Ar-**H**), 6.55 (d, 1H, Ar-**H**,  $J = 8.4$  Hz), 6.80-6.90 (m, 2H, Ar-**H**), 7.02-7.08 (m, 2H, Ar-**H**), 7.12-7.15 (m, 3H, Ar-**H**), 7.20-7.29 (m, 2H, Ar-**H**), 7.30-7.39 (m, 5H, Ar-**H**), 7.54-7.62 (m, 6H, Ar-**H**), 9.24 (t, 1H, N-**H**,  $J = 5.7$  Hz, exchangeable with  $\text{D}_2\text{O}$ );  $^{13}\text{C}$  NMR (75 MHz,  $\text{CDCl}_3$ ) ( $\delta/\text{ppm}$ ): 21.2 (**CH**<sub>3</sub>), 46.3 (**CH**<sub>2</sub>), 111.8, 114.8, 118.3, 122.2, 123.6, 126.8, 127.2, 127.6, 127.8, 128.1, 128.2, 128.4, 128.6, 129.0, 129.1, 129.6, 132.6, 134.6, 135.9, 136.5, 136.7, 138.2, 139.9 ( $>\text{C}-\text{N}<$ ), 149.8 ( $>\text{C}=\text{N}-$ ), 151.4 ( $>\text{C}-\text{NH}-$ ), 190.9 ( $>\text{C}=\text{O}$ ); ESI-QTOF-MS ( $m/z$ ): mass calculated for  $[\text{C}_{36}\text{H}_{29}\text{N}_3\text{O} + \text{H}]^+$ : 520.23963, found: 520.23941.

**g) 5-(2-allylaminobenzoyl)-1,3,4-triphenyl-1H-pyrazole 6a**

Yield (66 %); m.p.: 148-150 °C; FT-IR ( $\nu_{\max}$ ,  $\text{cm}^{-1}$ ): 3292 (N-H), 3061 and 3026 ( $=\text{CH}$  vinylic and C-H aromatic), 2985, 2913 and 2854 (C-H aliphatic), 1616 ( $>\text{C}=\text{O}$ ), 1568 ( $>\text{C}=\text{N}$ , pyrazole ring), 1515 and 1497 ( $>\text{C}=\text{C}<$ , aromatic ring), 1429 (C-N<);  $^1\text{H}$  NMR (300 MHz,  $\text{CDCl}_3$ ) ( $\delta/\text{ppm}$ ): 3.89-3.94 (m, 2H,  $-\text{CH}_2-$ ), 5.18-5.25 (m, 2H,  $=\text{CH}_2$  allylic), 5.89-5.99 (m, 1H,  $-\text{CH}=\text{allylic}$ ), 6.31-6.36 (m, 1H, Ar-**H**), 6.58 (d, 1H, Ar-**H**,  $J = 8.4$  Hz), 7.18-7.39 (m, 13H, Ar-**H**), 7.53-7.60 (m, 4H, Ar-**H**), 8.96 (t, 1H, N-**H**,  $J = 5.7$  Hz, exchangeable with  $\text{D}_2\text{O}$ );  $^{13}\text{C}$  NMR (75 MHz,  $\text{CDCl}_3$ ) ( $\delta/\text{ppm}$ ): 44.7 ( $-\text{CH}_2-$ ), 111.7, 114.5, 116.1 ( $=\text{CH}_2$  allylic), 117.9, 123.6, 127.1, 127.8, 127.9, 128.3, 128.4, 128.6, 129.1, 129.9, 131.8, 132.5, 133.8, 134.6, 135.9 ( $-\text{CH}=\text{allylic}$ ), 138.1, 139.8, 139.9 ( $>\text{C}-\text{N}<$ ), 149.8 ( $>\text{C}=\text{N}-$ ), 151.6 ( $>\text{C}-\text{NH}-$ ), 190.6 ( $>\text{C}=\text{O}$ ); ESI-QTOF-MS ( $m/z$ ): mass calculated for  $[\text{C}_{31}\text{H}_{25}\text{N}_3\text{O} + \text{H}]^+$ : 456.20782, found: 456.20812.

**h) 5-(2-allylaminobenzoyl)-4-(4-methoxyphenyl)-1,3-diphenyl-1H-pyrazole 6b**

Yield (73 %); m.p.: 146-148 °C; FT-IR ( $\nu_{\max}$ ,  $\text{cm}^{-1}$ ): 3346 (N-H), 3060 and 3026 (=CH vinylic and C-H aromatic), 2985, 2954 and 2835 (C-H aliphatic), 1614 (>C=O), 1567 (>C=N, pyrazole ring), 1497 (>C=C<, aromatic ring), 1424 (C-N<), 1242 (C-O);  $^1\text{H}$  NMR (300 MHz,  $\text{CDCl}_3$ ) ( $\delta/\text{ppm}$ ): 3.77 (s, 3H,  $-\text{OCH}_3$ ), 3.89-3.93 (m, 2H,  $-\text{CH}_2-$ ), 5.17-5.26 (m, 2H, = $\text{CH}_2$  allylic), 5.87-5.99 (m, 1H,  $-\text{CH}=\text{allylic}$ ), 6.31-6.37 (m, 1H, Ar- $\text{H}$ ), 6.59 (d, 1H, Ar- $\text{H}$ ,  $J = 8.4$  Hz), 6.74-6.78 (m, 2H, Ar- $\text{H}$ ), 7.13-7.38 (m, 10H, Ar- $\text{H}$ ), 7.52-7.61 (m, 4H, Ar- $\text{H}$ ), 8.96 (t, 1H, N- $\text{H}$ ,  $J = 5.7$  Hz, exchangeable with  $\text{D}_2\text{O}$ );  $^{13}\text{C}$  NMR (75 MHz,  $\text{CDCl}_3$ ) ( $\delta/\text{ppm}$ ): 44.7 ( $-\text{CH}_2-$ ), 55.1 ( $-\text{OCH}_3$ ), 111.7, 113.8, 114.5, 116.1 (=  $\text{CH}_2$  allylic), 117.9, 121.1, 121.8, 123.5, 124.0, 127.5, 127.8, 128.2, 128.4, 128.6, 129.1, 131.0, 132.6, 133.8, 134.6, 135.9 ( $-\text{CH}=\text{allylic}$ ), 139.8, 139.8 (> $\text{C}-\text{N}$ <), 149.8 (> $\text{C}=\text{N}$ -), 151.6 (> $\text{C}-\text{NH}$ -), 158.6 (> $\text{C}-\text{OCH}_3$ ), 190.8 (> $\text{C}=\text{O}$ ); ESI-QTOF-MS (m/z): mass calculated for  $[\text{C}_{32}\text{H}_{27}\text{N}_3\text{O}_2+\text{H}]^+$ : 486.21761, found: 486.21814.

**i) 5-(2-allylaminobenzoyl)-4-(4-chlorophenyl)-1,3-diphenyl-1H-pyrazole 6c**

Yield (69 %); m.p.: 130-132 °C; FT-IR ( $\nu_{\max}$ ,  $\text{cm}^{-1}$ ): 3352 (N-H), 3081, 3062 and 3015 (=CH vinylic and C-H aromatic), 2982, 2983 and 2839 (C-H aliphatic), 1613 (>C=O), 1566 (>C=N, pyrazole ring), 1496 (>C=C<, aromatic ring), 1421 (C-N<), 726 (C-Cl);  $^1\text{H}$  NMR (300 MHz,  $\text{CDCl}_3$ ) ( $\delta/\text{ppm}$ ): 3.90-3.95 (m, 2H,  $-\text{CH}_2-$ ), 5.19-5.27 (m, 2H, = $\text{CH}_2$  allylic), 5.87-6.00 (m, 1H,  $-\text{CH}=\text{allylic}$ ), 6.31-6.36 (m, 1H, Ar- $\text{H}$ ), 6.61 (d, 1H, Ar- $\text{H}$ ,  $J = 8.7$  Hz), 7.14-7.39 (m, 12H, Ar- $\text{H}$ ), 7.52-7.57 (m, 4H, Ar- $\text{H}$ ), 8.96 (t, 1H, N- $\text{H}$ ,  $J = 5.7$  Hz, exchangeable with  $\text{D}_2\text{O}$ );  $^{13}\text{C}$  NMR (75 MHz,  $\text{CDCl}_3$ ) ( $\delta/\text{ppm}$ ): 44.7 ( $-\text{CH}_2-$ ), 111.8, 114.6, 116.2 (=  $\text{CH}_2$  allylic), 117.7, 120.8, 123.6, 127.7, 128.1, 128.4, 128.6, 129.1, 130.4, 131.1, 132.2, 133.1, 133.7, 134.4, 136.2 ( $-\text{CH}=\text{allylic}$ ), 139.7, 140.0 (> $\text{C}-\text{N}$ <), 149.8 (> $\text{C}=\text{N}$ -), 151.7 (> $\text{C}-\text{NH}$ -), 190.3 (> $\text{C}=\text{O}$ ); ESI-QTOF-MS (m/z): mass calculated for  $[\text{C}_{31}\text{H}_{24}\text{ClN}_3\text{O}+\text{H}]^+$ : 490.16939, found: 490.16973.

**j) 5-(2-propargylaminobenzoyl)-1,3,4-triphenyl-1H-pyrazole 7a**

Yield (57 %); m.p.: 178-180 °C; FT-IR ( $\nu_{\max}$ ,  $\text{cm}^{-1}$ ): 3329 (N-H), 3282 ( $\equiv\text{CH}$  propargylic), 3060 (C-H aromatic), 2910 and 2853 (C-H aliphatic), 1616 (>C=O), 1562 (>C=N, pyrazole ring), 1496 (>C=C<, aromatic ring), 1426 (C-N<);  $^1\text{H}$  NMR (300 MHz,  $\text{CDCl}_3$ ) ( $\delta/\text{ppm}$ ): 2.26 (t, 1H,  $-\text{C}\equiv\text{CH}$ ,  $J = 2.4$  Hz), 4.04 (dd, 2H,  $-\text{CH}_2-$ ,  $J = 2.4, 5.7$  Hz), 6.38-6.44 (m, 1H, Ar- $\text{H}$ ), 6.72 (d, 1H, Ar- $\text{H}$ ,  $J = 8.1$  Hz), 7.21-7.41 (m, 13H, Ar- $\text{H}$ ), 7.50-7.59 (m, 4H, Ar- $\text{H}$ ), 8.85 (t, 1H, N- $\text{H}$ ,  $J = 5.7$  Hz, exchangeable with  $\text{D}_2\text{O}$ );  $^{13}\text{C}$  NMR (75 MHz,  $\text{CDCl}_3$ ) ( $\delta/\text{ppm}$ ): 32.2 ( $-\text{CH}_2-$ ), 71.5 ( $-\text{C}\equiv\text{CH}$ ), 79.7 ( $-\text{C}\equiv\text{CH}$ ), 111.5, 115.5, 118.6, 122.4, 123.7, 127.1, 127.7, 127.9, 128.2, 128.3, 128.4, 129.1, 129.9, 130.8, 131.7, 132.4, 134.6, 136.0, 139.7, 139.7 (> $\text{C}-\text{N}$ <), 149.8 (> $\text{C}=\text{N}$ -

),150.5 ( $>\underline{\text{C}}\text{-NH-}$ ), 190.8 ( $>\underline{\text{C}}=\text{O}$ ); ESI-QTOF-MS (m/z): mass calculated for  $[\text{C}_{31}\text{H}_{23}\text{N}_3\text{O}+\text{H}]^+$ : 454.19237, found: 454.19251.

**k) 4-(4-methoxyphenyl)-1,3-diphenyl-5-(2-propargylaminobenzoyl)- 1H-pyrazole 7b**

Yield (68 %); m.p.: 170-172 °C; FT-IR ( $\nu_{\text{max}}$ ,  $\text{cm}^{-1}$ ): 3323 (N-H), 3247 ( $\equiv\text{CH}$  propargylic), 3042 (C-H aromatic), 2956, 2914 and 2834 (C-H aliphatic), 1617 ( $>\text{C}=\text{O}$ ), 1566 ( $>\text{C}=\text{N}$ , pyrazole ring), 1496 ( $>\text{C}=\text{C}<$ , aromatic ring), 1427 (C-N<), 1245 (C-O);  $^1\text{H}$  NMR (300 MHz,  $\text{CDCl}_3$ ) ( $\delta/\text{ppm}$ ): 2.26 (t, 1H,  $-\text{C}\equiv\text{CH}$ ,  $J = 2.4\text{Hz}$ ), 3.76 (s, 3H,  $-\text{OCH}_3$ ), 4.04 (dd, 2H,  $-\text{CH}_2-$ ,  $J = 2.4, 5.7\text{Hz}$ ), 6.04-6.45 (m, 1H, Ar- $\underline{\text{H}}$ ), 6.71-6.78 (m, 3H, Ar- $\underline{\text{H}}$ ), 7.12-7.16 (m, 2H, Ar- $\underline{\text{H}}$ ), 7.25-7.41 (m, 8H, Ar- $\underline{\text{H}}$ ), 7.51-7.57 (m, 2H, Ar- $\underline{\text{H}}$ ), 7.58-7.61 (m, 2H, Ar- $\underline{\text{H}}$ ), 8.86 (t, 1H, N- $\underline{\text{H}}$ ,  $J = 5.7\text{Hz}$ , exchangeable with  $\text{D}_2\text{O}$ );  $^{13}\text{C}$  NMR (75 MHz,  $\text{CDCl}_3$ ) ( $\delta/\text{ppm}$ ): 32.2 ( $-\text{CH}_2-$ ), 55.1 ( $-\text{OCH}_3$ ), 71.5 ( $-\text{C}\equiv\text{CH}$ ), 79.7 ( $-\text{C}\equiv\text{CH}$ ), 111.6, 113.8, 115.5, 118.6, 122.1, 123.6, 123.9, 127.6, 127.7, 127.8, 128.2, 128.4, 129.1, 131.0, 132.6, 134.7, 136.0, 139.8 ( $>\underline{\text{C}}\text{-N}<$ ), 149.8 ( $>\underline{\text{C}}=\text{N-}$ ), 150.5 ( $>\underline{\text{C}}\text{-NH-}$ ), 158.7 ( $>\underline{\text{C}}\text{-OCH}_3$ ), 190.0 ( $>\underline{\text{C}}=\text{O}$ ); ESI-QTOF-MS (m/z): mass calculated for  $[\text{C}_{32}\text{H}_{25}\text{N}_3\text{O}_2+\text{H}]^+$ : 484.20195, found: 484.20220.

**l) 5-(2-methylaminobenzoyl)-1,3,4-triphenyl-1H-pyrazole (8a)**

Yield (83 %); m.p.: 200-202 °C; FT-IR ( $\nu_{\text{max}}$ ,  $\text{cm}^{-1}$ ): 3316 (N-H), 3051 (C-H aromatic), 2984, 2900, 2868 and 2817 (C-H aliphatic), 1618 ( $>\text{C}=\text{O}$ ), 1569 ( $>\text{C}=\text{N}$ , pyrazole ring), 1522 and 1499 ( $>\text{C}=\text{C}<$ , aromatic ring), 1424 (C-N<);  $^1\text{H}$  NMR (300 MHz,  $\text{CDCl}_3$ ) ( $\delta/\text{ppm}$ ): 2.92 (d, 3H,  $-\text{CH}_3$ ,  $J = 5.1\text{ Hz}$ ), 6.30-6.35 (m, 1H, Ar- $\underline{\text{H}}$ ), 6.60 (d, 1H, Ar- $\underline{\text{H}}$ ,  $J = 8.4\text{ Hz}$ ), 7.20-7.39 (m, 13H, Ar- $\underline{\text{H}}$ ), 7.53-7.55 (m, 4H, Ar- $\underline{\text{H}}$ ), 8.81 (q, 1H, N- $\underline{\text{H}}$ ,  $J = 4.8\text{ Hz}$ , exchangeable with  $\text{D}_2\text{O}$ );  $^{13}\text{C}$  NMR (75 MHz,  $\text{CDCl}_3$ ) ( $\delta/\text{ppm}$ ): 29.3 ( $\underline{\text{C}}\text{H}_3$ ), 110.9, 114.2, 117.5, 123.7, 127.1, 127.6, 127.9, 128.3, 128.5, 129.1, 129.9, 131.8, 132.5, 134.7, 136.1, 139.8, 139.9 ( $>\underline{\text{C}}\text{-N}<$ ), 149.8 ( $>\underline{\text{C}}=\text{N-}$ ), 152.7 ( $>\underline{\text{C}}\text{-NH-}$ ), 190.4 ( $>\underline{\text{C}}=\text{O}$ ); ESI-QTOF-MS (m/z): mass calculated for  $[\text{C}_{29}\text{H}_{23}\text{N}_3\text{O}+\text{H}]^+$ : 430.19312, found: 430.19316.

**m) 4-(4-methoxyphenyl)-5-(2-methylaminobenzoyl)-1,3-diphenyl-1H-pyrazole (8b)**

Yield (89 %); m.p.: 176-178 °C; FT-IR ( $\nu_{\text{max}}$ ,  $\text{cm}^{-1}$ ): 3309 (N-H), 3052, 3005 (C-H aromatic), 2933, 2905 and 2834 (C-H aliphatic), 1617 ( $>\text{C}=\text{O}$ ), 1570 ( $>\text{C}=\text{N}$ , pyrazole ring), 1519 and 1497 ( $>\text{C}=\text{C}<$ , aromatic ring), 1427 (C-N<), 1286 (C-O);  $^1\text{H}$  NMR (300 MHz,  $\text{CDCl}_3$ ) ( $\delta/\text{ppm}$ ): 2.92 (d, 3H,  $-\text{CH}_3$ ,  $J = 5.1\text{Hz}$ ), 3.77 (s, 3H,  $\text{OCH}_3$ ), 6.34-6.37 (m, 1H, Ar- $\underline{\text{H}}$ ), 6.61 (d, 1H, Ar- $\underline{\text{H}}$ ,  $J = 8.4\text{ Hz}$ ), 6.76-6.79 (m, 2H, Ar- $\underline{\text{H}}$ ), 7.12-7.16 (m, 2H, Ar- $\underline{\text{H}}$ ), 7.27-7.38 (m, 8H, Ar- $\underline{\text{H}}$ ), 7.51-7.55 (m, 4H, Ar- $\underline{\text{H}}$ ), 8.80 (q, 1H, N- $\underline{\text{H}}$ ,  $J = 5.4\text{Hz}$ );  $^{13}\text{C}$  NMR (75 MHz,  $\text{CDCl}_3$ ) ( $\delta/\text{ppm}$ ):

29.2 ( $\underline{\text{C}}\text{H}_3$ ), 55.1 ( $-\text{O}\underline{\text{C}}\text{H}_3$ ), 110.9, 113.9, 114.2, 117.5, 123.5, 123.7, 127.6, 128.2, 128.5, 129.1, 129.6, 131.0, 131.2, 133.7, 134.6, 136.2, 139.8, 140.0 ( $>\underline{\text{C}}-\text{N}<$ ), 148.7 ( $>\underline{\text{C}}=\text{N}-$ ), 152.7 ( $>\underline{\text{C}}-\text{NH}-$ ), 158.8 ( $>\underline{\text{C}}-\text{OCH}_3$ ), 190.4 ( $>\underline{\text{C}}=\text{O}$ ); ESI-QTOF-MS (m/z): mass calculated for  $[\text{C}_{30}\text{H}_{25}\text{N}_3\text{O}_2 + \text{H}]^+$ : 460.20398, found: 460.20405.

**n) 4-(4-chlorophenyl)-5-(2-methylaminobenzoyl)-1,3-diphenyl-1H-pyrazole (8c)**

Yield (76 %); m.p.: 174-176 °C; FT-IR ( $\nu_{\text{max}}$ ,  $\text{cm}^{-1}$ ): 3350 (N-H), 3073, 3056, 3027 (C-H aromatic), 2920, 2906 and 2881 (C-H aliphatic), 1619 ( $>\text{C}=\text{O}$ ), 1566 ( $>\text{C}=\text{N}$ , pyrazole ring), 1518 and 1497 ( $>\text{C}=\text{C}<$ , aromatic ring), 1424 (C-N<), 725 (C-Cl);  $^1\text{H}$  NMR (300 MHz,  $\text{CDCl}_3$ ) ( $\delta/\text{ppm}$ ): 2.93 (d, 3H,  $-\underline{\text{C}}\text{H}_3$ ,  $J = 5.1\text{Hz}$ ), 6.32-6.37 (m, 1H, Ar- $\underline{\text{H}}$ ), 6.63 (d, 1H, Ar- $\underline{\text{H}}$ ,  $J = 8.4\text{Hz}$ ), 7.14-7.21 (m, 4H, Ar- $\underline{\text{H}}$ ), 7.25-7.39 (m, 7H, Ar- $\underline{\text{H}}$ ), 7.53-7.58 (m, 4H, Ar- $\underline{\text{H}}$ ), 8.81 (q, 1H, N- $\underline{\text{H}}$ ,  $J = 5.7\text{Hz}$ , exchangeable with  $\text{D}_2\text{O}$ );  $^{13}\text{C}$  NMR (75 MHz,  $\text{CDCl}_3$ ) ( $\delta/\text{ppm}$ ): 29.3 ( $\underline{\text{C}}\text{H}_3$ ), 111.1, 114.3, 117.4, 120.7, 123.6, 127.7, 128.1, 128.4, 128.4, 128.6, 129.1, 130.4, 131.1, 132.3, 133.1, 134.5, 136.3, 139.7, 140.0 ( $>\underline{\text{C}}-\text{N}<$ ), 149.8 ( $>\underline{\text{C}}=\text{N}-$ ), 152.8 ( $>\underline{\text{C}}-\text{NH}-$ ), 190.1 ( $>\underline{\text{C}}=\text{O}$ ); ESI-QTOF-MS (m/z): mass calculated for  $[\text{C}_{29}\text{H}_{22}\text{ClN}_3\text{O} + \text{H}]^+$ : 464.15393, found: 464.15401.

**o) 5-(2-methylaminobenzoyl)-1,3-diphenyl-4-(p-tolyl)-1H-pyrazole (8d)**

Yield (91 %); m.p.: 172-174 °C; FT-IR ( $\nu_{\text{max}}$ ,  $\text{cm}^{-1}$ ): 3318 (N-H), 3058, 3023 (C-H aromatic), 2977, 2918, 2868 and 2816 (C-H aliphatic), 1618 ( $>\text{C}=\text{O}$ ), 1568 ( $>\text{C}=\text{N}$ , pyrazole ring), 1518 and 1498 ( $>\text{C}=\text{C}<$ , aromatic ring), 1423 (C-N<);  $^1\text{H}$  NMR (300 MHz,  $\text{CDCl}_3$ ) ( $\delta/\text{ppm}$ ): 2.29 (s, 3H,  $-\underline{\text{C}}\text{H}_3$ ), 2.92 (d, 3H,  $-\underline{\text{C}}\text{H}_3$ ,  $J = 5.1\text{Hz}$ ), 6.31-6.37 (m, 1H, Ar- $\underline{\text{H}}$ ), 6.61 (d, 1H, Ar- $\underline{\text{H}}$ ,  $J = 8.4\text{Hz}$ ), 7.02 (d, 2H, Ar- $\underline{\text{H}}$ ,  $J = 7.8\text{Hz}$ ), 7.12 (d, 2H, Ar- $\underline{\text{H}}$ ,  $J = 8.1\text{Hz}$ ), 7.23-7.38 (m, 8H, Ar- $\underline{\text{H}}$ ), 7.52-7.61 (m, 4H, Ar- $\underline{\text{H}}$ ), 8.82 (q, 1H, N- $\underline{\text{H}}$ ,  $J = 6\text{Hz}$ , exchangeable with  $\text{D}_2\text{O}$ );  $^{13}\text{C}$  NMR (75 MHz,  $\text{CDCl}_3$ ) ( $\delta/\text{ppm}$ ): 21.2 ( $\underline{\text{C}}\text{H}_3$ ), 29.3 ( $\underline{\text{C}}\text{H}_3$ ), 110.9, 114.2, 117.6, 122.0, 123.6, 127.5, 127.8, 128.2, 128.4, 128.7, 129.0, 129.1, 129.7, 132.7, 134.7, 136.1, 136.7, 139.8, 139.9 ( $>\underline{\text{C}}-\text{N}<$ ), 149.9 ( $>\underline{\text{C}}=\text{N}-$ ), 152.7 ( $>\underline{\text{C}}-\text{NH}-$ ), 190.6 ( $>\underline{\text{C}}=\text{O}$ ); ESI-QTOF-MS (m/z): mass calculated for  $[\text{C}_{30}\text{H}_{25}\text{N}_3\text{O} + \text{H}]^+$ : 444.20926, found: 444.20927.

**p) 5-(2-dimethylaminobenzoyl)-1,3,4-triphenyl-1H-pyrazole (9a)**

Yield (55 %); m.p.: 180-182 °C; FT-IR ( $\nu_{\text{max}}$ ,  $\text{cm}^{-1}$ ): 3057 (C-H aromatic), 2995, 2926, 2880 and 2808 (C-H aliphatic), 1624 ( $>\text{C}=\text{O}$ ), 1596 ( $>\text{C}=\text{N}$ , pyrazole ring), 1544 and 1496 ( $>\text{C}=\text{C}<$ , aromatic ring), 1409 (C-N<);  $^1\text{H}$  NMR (300 MHz,  $\text{CDCl}_3$ ) ( $\delta/\text{ppm}$ ): 2.67 (s, 6H,  $\underline{\text{C}}\text{H}_3$ ), 6.66-6.74 (m, 2H, Ar- $\underline{\text{H}}$ ), 7.18-7.37 (m, 12H, Ar- $\underline{\text{H}}$ ), 7.49-7.59 (m, 5H, Ar- $\underline{\text{H}}$ );  $^{13}\text{C}$  NMR (75 MHz,  $\text{CDCl}_3$ ) ( $\delta/\text{ppm}$ ): 43.9 (2  $\underline{\text{C}}\text{H}_3$ ), 116.3, 118.1, 123.3, 124.8, 126.8, 127.3, 127.7, 127.8, 127.9,

128.1, 128.2, 128.7, 130.7, 132.0, 132.5, 133.5, 133.9, 139.8, 140.5 ( $>\underline{\text{C}}-\text{N}<$ ), 149.8 ( $>\underline{\text{C}}=\text{N}-$ ), 152.4 ( $>\underline{\text{C}}-\text{N}(\text{CH}_3)_2$ ), 186.7 ( $>\underline{\text{C}}=\text{O}$ ); ESI-QTOF-MS (m/z): mass calculated for  $[\text{C}_{30}\text{H}_{25}\text{N}_3\text{O} + \text{H}]^+$ : 4744.20704, found: 444.20696.

**q) 4-(4-methoxyphenyl)-5-(2-dimethylaminobenzoyl)-1,3-diphenyl-1H-pyrazole (9b)**

Yield (67 %); m.p.: 134-136 °C; FT-IR ( $\nu_{\text{max}}$ ,  $\text{cm}^{-1}$ ): 3062, 3000 (C-H aromatic), 2961 and 2836 (C-H aliphatic), 1629 ( $>\text{C}=\text{O}$ ), 1597 ( $>\text{C}=\text{N}$ , pyrazole ring), 1544 and 1497 ( $>\text{C}=\text{C}<$ , aromatic ring), 1420 (C-N<), 1243 (C-O);  $^1\text{H}$  NMR (300 MHz,  $\text{CDCl}_3$ ) ( $\delta/\text{ppm}$ ): 2.67 (s, 6H,  $-\underline{\text{C}}\text{H}_3$ ), 3.78 (s, 3H,  $-\text{O}\underline{\text{C}}\text{H}_3$ ), 6.67-6.77 (m, 4H, Ar- $\underline{\text{H}}$ ), 7.15-7.24 (m, 2H, Ar- $\underline{\text{H}}$ ), 7.26-7.35 (m, 7H, Ar- $\underline{\text{H}}$ ), 7.46-7.58 (m, 5H, Ar- $\underline{\text{H}}$ );  $^{13}\text{C}$  NMR (75 MHz,  $\text{CDCl}_3$ ) ( $\delta/\text{ppm}$ ): 44.0 (2  $-\underline{\text{C}}\text{H}_3$ ), 55.1 ( $-\text{O}-\underline{\text{C}}\text{H}_3$ ), 113.4, 116.3, 118.2, 124.8, 127.7, 127.7, 128.1, 128.2, 128.7, 131.9, 133.4, 133.8, 140.0, 140.5 ( $>\underline{\text{C}}-\text{N}<$ ), 149.9 ( $>\underline{\text{C}}=\text{N}-$ ), 152.4 ( $>\underline{\text{C}}-\text{N}(\text{CH}_3)_2$ ), 158.7 ( $>\underline{\text{C}}-\text{OCH}_3$ ), 186.9 ( $>\underline{\text{C}}=\text{O}$ ); ESI-QTOF-MS (m/z): mass calculated for  $[\text{C}_{31}\text{H}_{27}\text{N}_3\text{O}_2 + \text{H}]^+$ : 474.21868, found: 474.21889.

**r) 4-(4-chlorophenyl)-5-(2-dimethylaminobenzoyl)-1,3-diphenyl-1H-pyrazole (9c)**

Yield (59 %); m.p.: 164-166 °C; FT-IR ( $\nu_{\text{max}}$ ,  $\text{cm}^{-1}$ ): 3062 (C-H aromatic), 2960, 2925 and 2810 (C-H aliphatic), 1626 ( $>\text{C}=\text{O}$ ), 1595 ( $>\text{C}=\text{N}$ , pyrazole ring), 1544 and 1497 ( $>\text{C}=\text{C}<$ , aromatic ring), 1414 (C-N<), 729 (C-Cl);  $^1\text{H}$  NMR (300 MHz,  $\text{CDCl}_3$ ) ( $\delta/\text{ppm}$ ): 2.67 (s, 6H,  $-\underline{\text{C}}\text{H}_3$ ), 6.67-6.76 (m, 2H, Ar- $\underline{\text{H}}$ ), 7.20-7.24 (m, 4H, Ar- $\underline{\text{H}}$ ), 7.25-7.34 (m, 1H, Ar- $\underline{\text{H}}$ ), 7.36-7.37 (m, 6H, Ar- $\underline{\text{H}}$ ), 7.48-7.53 (m, 5H, Ar- $\underline{\text{H}}$ );  $^{13}\text{C}$  NMR (75 MHz,  $\text{CDCl}_3$ ) ( $\delta/\text{ppm}$ ): 44.1 (2  $-\underline{\text{C}}\text{H}_3$ ), 116.5, 118.5, 122.1, 124.9, 126.9, 128.0, 128.0, 128.2, 128.3, 128.7, 130.6, 132.0, 132.2, 133.3, 133.6, 133.6, 139.8, 140.5 ( $>\underline{\text{C}}-\text{N}<$ ), 149.8 ( $>\underline{\text{C}}=\text{N}-$ ), 152.5 ( $>\underline{\text{C}}-\text{N}(\text{CH}_3)_2$ ), 186.5 ( $>\underline{\text{C}}=\text{O}$ ); ESI-QTOF-MS (m/z): mass calculated for  $[\text{C}_{30}\text{H}_{24}\text{ClN}_3\text{O} + \text{H}]^+$ : 478.16992, found: 478.17013.

**s) 5-(2-dimethylaminobenzoyl)-1,3-diphenyl-4-(p-tolyl)-1H-pyrazole (9d)**

Yield (67 %); m.p.: 158-160 °C; FT-IR ( $\nu_{\text{max}}$ ,  $\text{cm}^{-1}$ ): 3060 (C-H aromatic), 2923 and 2808 (C-H aliphatic), 1625 ( $>\text{C}=\text{O}$ ), 1595 ( $>\text{C}=\text{N}$ , pyrazole ring), 1545 and 1496 ( $>\text{C}=\text{C}<$ , aromatic ring), 1419 (C-N<);  $^1\text{H}$  NMR (300 MHz,  $\text{CDCl}_3$ ) ( $\delta/\text{ppm}$ ): 2.3 (s, 3H,  $-\underline{\text{C}}\text{H}_3$ ), 2.68 (s, 6H,  $-\underline{\text{C}}\text{H}_3$ ), 6.67-6.74 (m, 2H, Ar- $\underline{\text{H}}$ ), 7.01 (d, 2H, Ar- $\underline{\text{H}}$ ,  $J = 7.8\text{Hz}$ ), 7.12-7.15 (m, 2H, Ar- $\underline{\text{H}}$ ), 7.21-7.34 (m, 7H, Ar- $\underline{\text{H}}$ ), 7.47-7.59 (m, 5H, Ar- $\underline{\text{H}}$ );  $^{13}\text{C}$  NMR (75 MHz,  $\text{CDCl}_3$ ) ( $\delta/\text{ppm}$ ): 21.2 ( $-\underline{\text{C}}\text{H}_3$ ), 44.0 (2  $-\underline{\text{C}}\text{H}_3$ ), 116.2, 118.1, 123.4, 124.8, 126.8, 127.7, 127.7, 128.1, 128.1, 128.7, 128.9, 130.5, 132.6, 133.4, 134.0, 136.9, 139.9, 140.5 ( $>\underline{\text{C}}-\text{N}<$ ), 149.8 ( $>\underline{\text{C}}=\text{N}-$ ), 152.4 ( $>\underline{\text{C}}-\text{N}(\text{CH}_3)_2$ ), 186.8 ( $>\underline{\text{C}}=\text{O}$ ); ESI-QTOF-MS (m/z): mass calculated for  $[\text{C}_{31}\text{H}_{27}\text{N}_3\text{O}_2 + \text{H}]^+$ : 458.22451, found: 458.22503.

### 3. Antimicrobial Activity

The antimicrobial activity of the synthesized compounds was studied against *Listeria innocua* CECT 4030, *Staphylococcus aureus* CECT 976, *Escherichia coli* K12 as positive and negative bacterial strains. *Candida albicans* ATCC 10231 was used to evaluate the antifungal activity<sup>S1</sup>. The fungi strain was cultured in malt extract (15g in 1liter)<sup>S2</sup>, and the used bacterial strains were cultivated in Luria-Bertani (LB) medium (10g Tryptone, 5g Yeast extract, 10g NaCl in 1liter). The fungi strain and all pathogens bacteria were incubated at 37°C for 48h.

The tested compounds were dissolved in the dimethyl sulfoxide (DMSO) and mixed with sterile LB medium. The *in vitro* screening of the compounds against bacterial and fungi strains was carried out using the broth microdilution method in 96-well plates, according to the previously described methods<sup>S3,S4</sup>, and following guidelines of the Clinical and Laboratory Standards Institute (CLSI, approved Standard M7-A8 and M27-A3)<sup>S5,S6</sup>. From a stock solution of the tested compounds and reference drugs dissolved in DMSO, the required concentrations of 2000, 1000, 500, 250, 125, 62.5, 31.25, 15.62, 7.81 and 3.90 µg/mL were prepared by the successive dilution ½. Each well was inoculated by 100µL of Luria Bertani medium liquid culture medium (LB) for bacteria and Malt Extract (ME) liquid culture medium for fungi, more than 50µL of the tested compounds; every well was then inoculated with 50µL of the microbial concentration. Negative controls (bacteria and fungi without drugs) and positive controls (fungi and bacteria plus a serially diluted antibiotic) were included on every plate. The fluconazole and Streptomycin were used as positives controls for fungi and bacteria, respectively. After incubation at appropriate temperature and period, the activity assay and viability of microbial cell were evaluated with 2,3,5-triphenyl-2H-tetrazolium chloride (TTC) indicator (0.04 mg/mL), 10µL of TTC was added to each well. Results were recorded visually in terms of Minimum inhibitory concentration (MIC, µmol/mL). The Minimum Inhibitory Concentration (MIC) was the lowest concentration of synthesized compounds that completely inhibit microbial strains.

The minimum fungicidal concentrations (MFCs) and the minimum bactericidal concentrations (MBCs) was determined by sub-culturing negative wells that showed no microbial growth. Bacterial strains were subculture onto the surface of LB agar medium and fungal strain on EM agar medium. The MFC and MBC were defined as the lowest concentrations of compounds resulting no microbial growth of strains on the LB and EM agar media<sup>S7</sup>.



#### 4. FT-IR, $^1\text{H}$ , $^{13}\text{C}$ NMR and HRMS spectra of synthesized compounds

##### a) 5-(2-ethylaminobenzoyl)-1,3,4-triphenyl-1H pyrazole (4a)

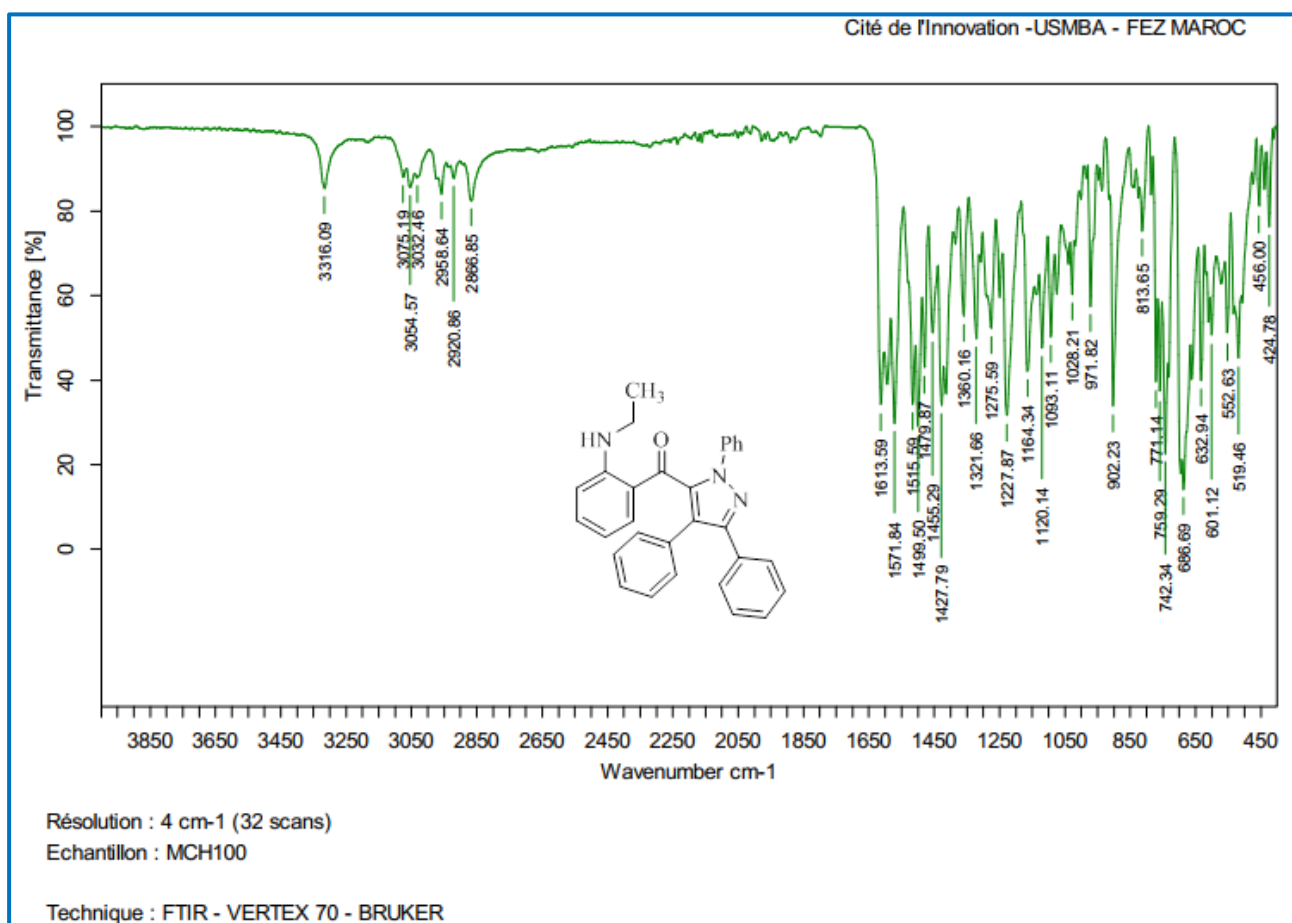

*Figure S5.* IR spectrum of compound (4a)

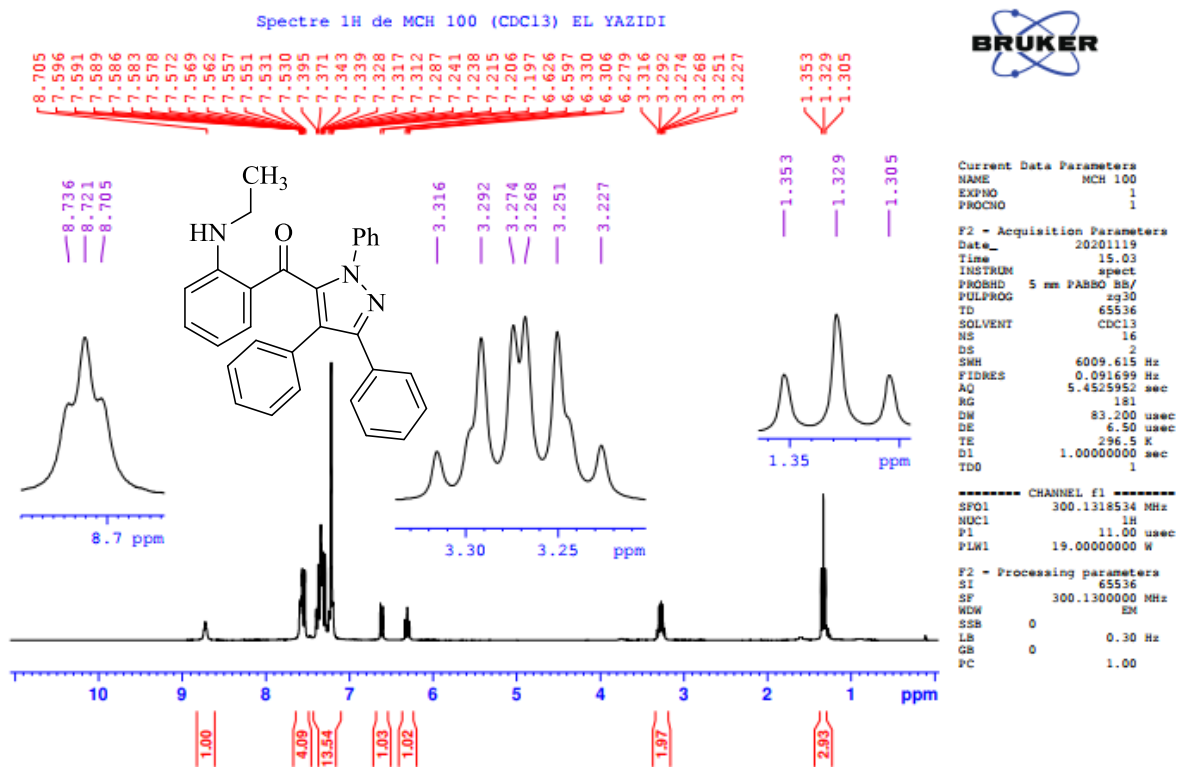

Figure S6. <sup>1</sup>H NMR spectrum (300 MHz, CDCl<sub>3</sub>) of compound (4a)

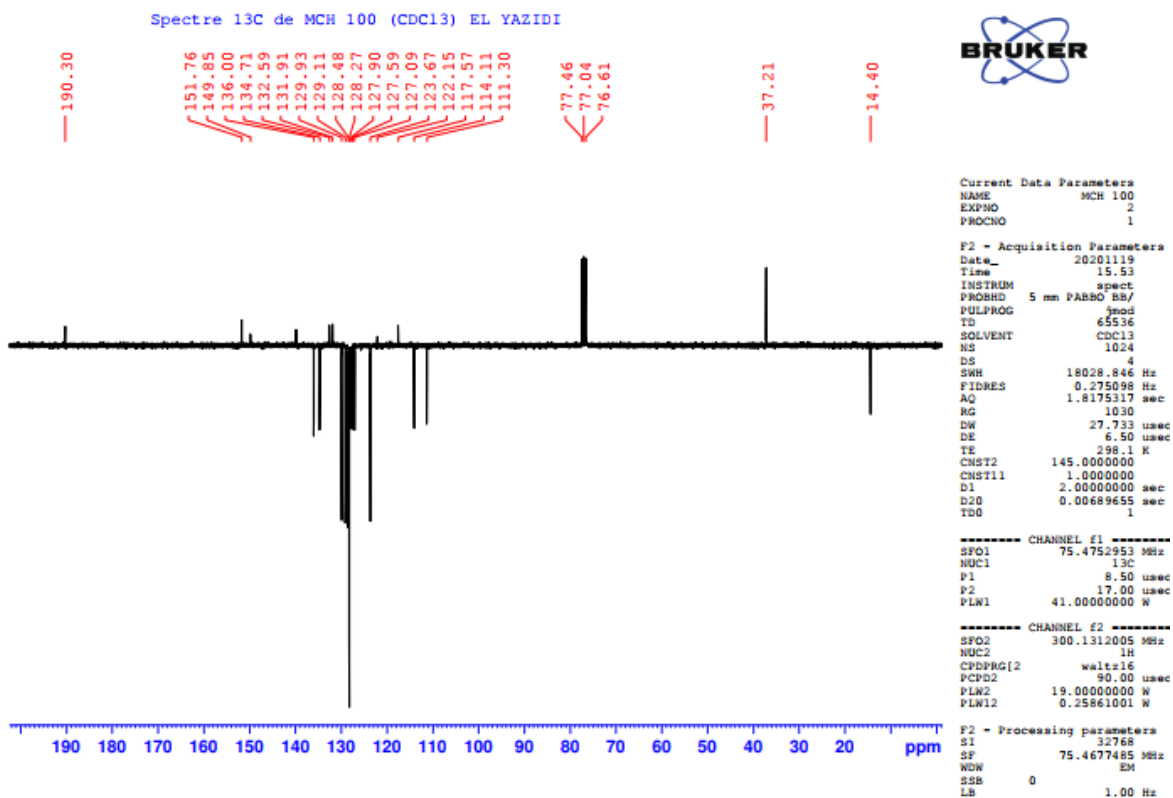

Figure S7. <sup>13</sup>C NMR spectrum (75 MHz, CDCl<sub>3</sub>) of compound (4a)

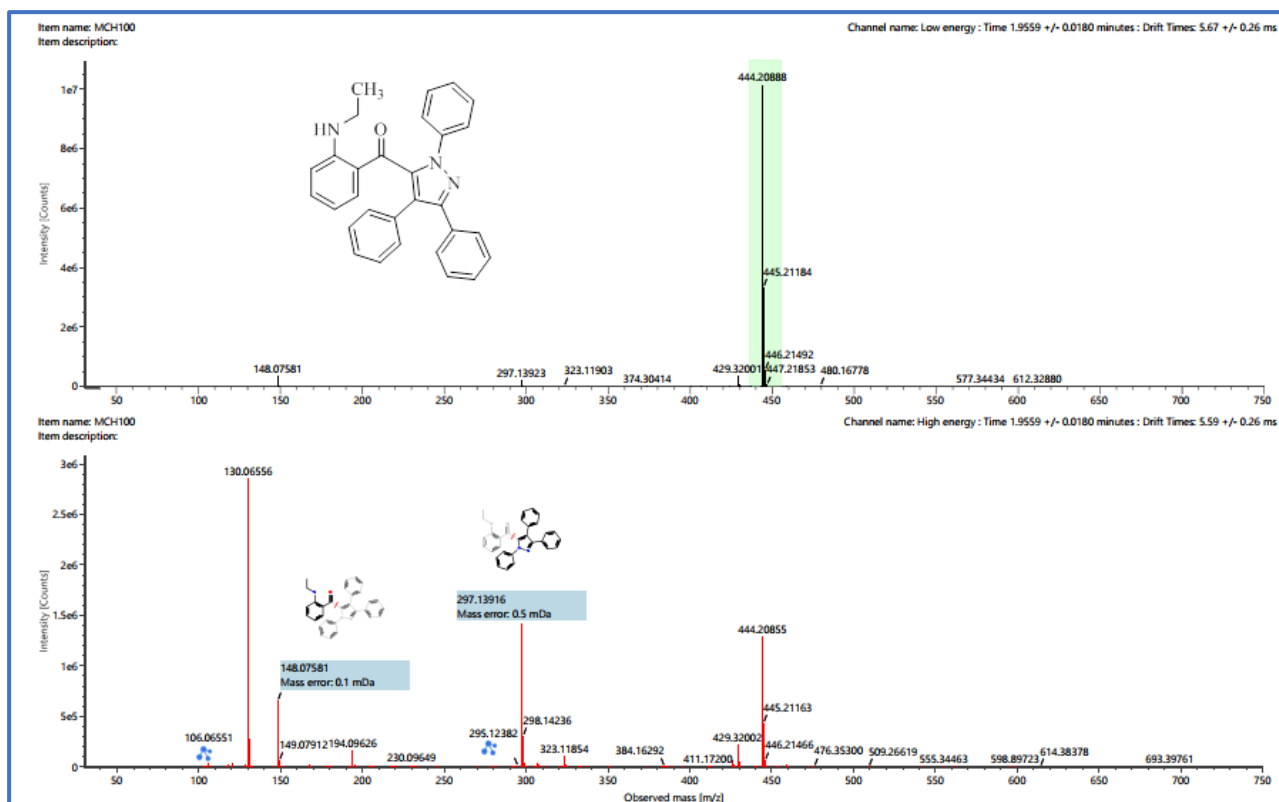

*Figure S8.* Mass spectrum of compound (**4a**)

**b) 5-(2-ethylaminobenzoyl)-4-(4-methoxyphenyl)-1,3-diphenyl-1H-pyrazole (**4b**)**

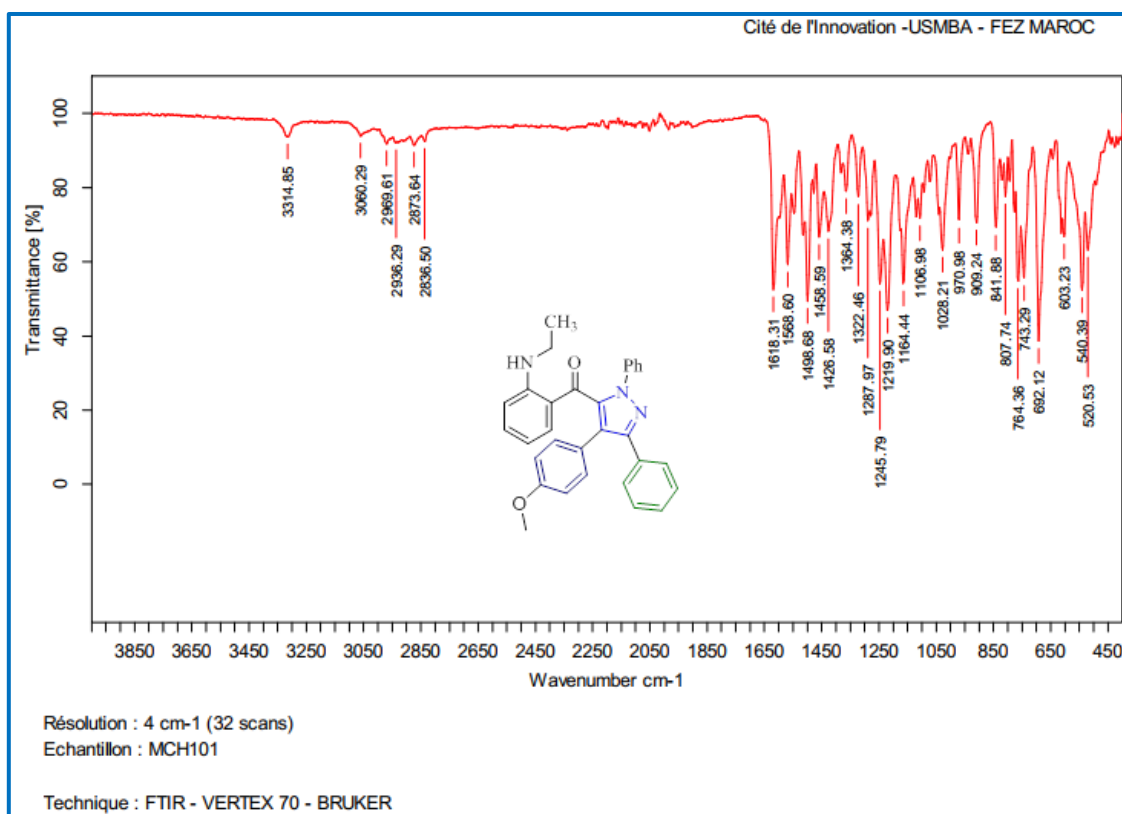

*Figure S9.* IR spectrum of compound (**4b**)

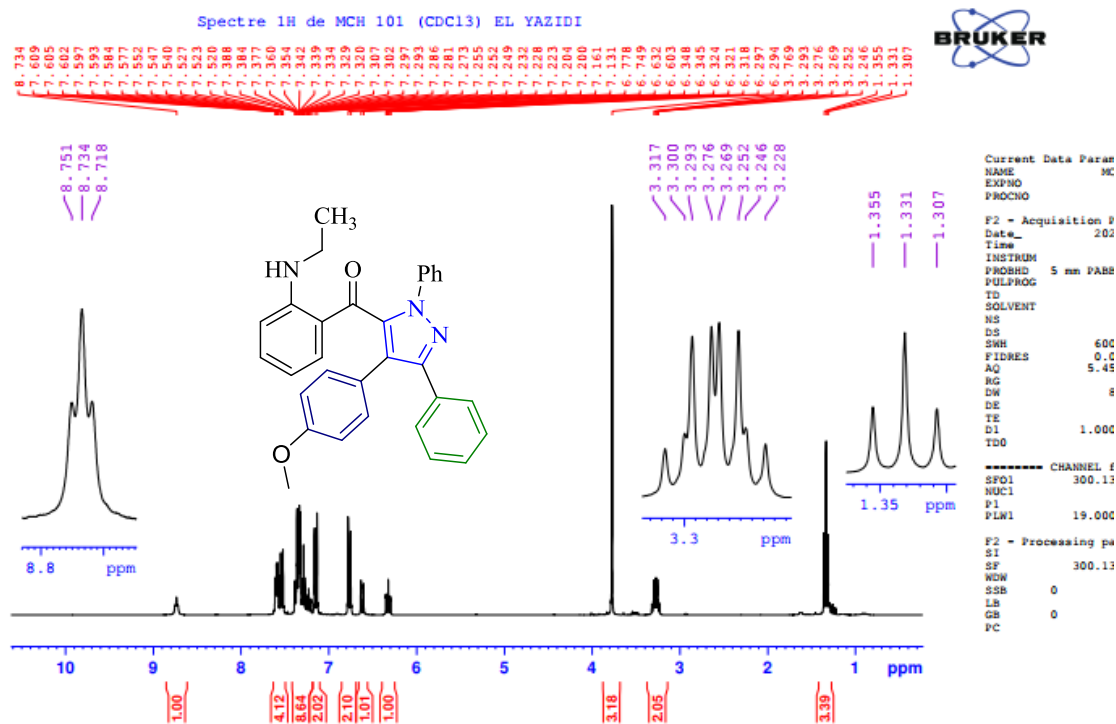

Figure S10. <sup>1</sup>H NMR spectrum (300 MHz, CDCl<sub>3</sub>) of compound (4b)

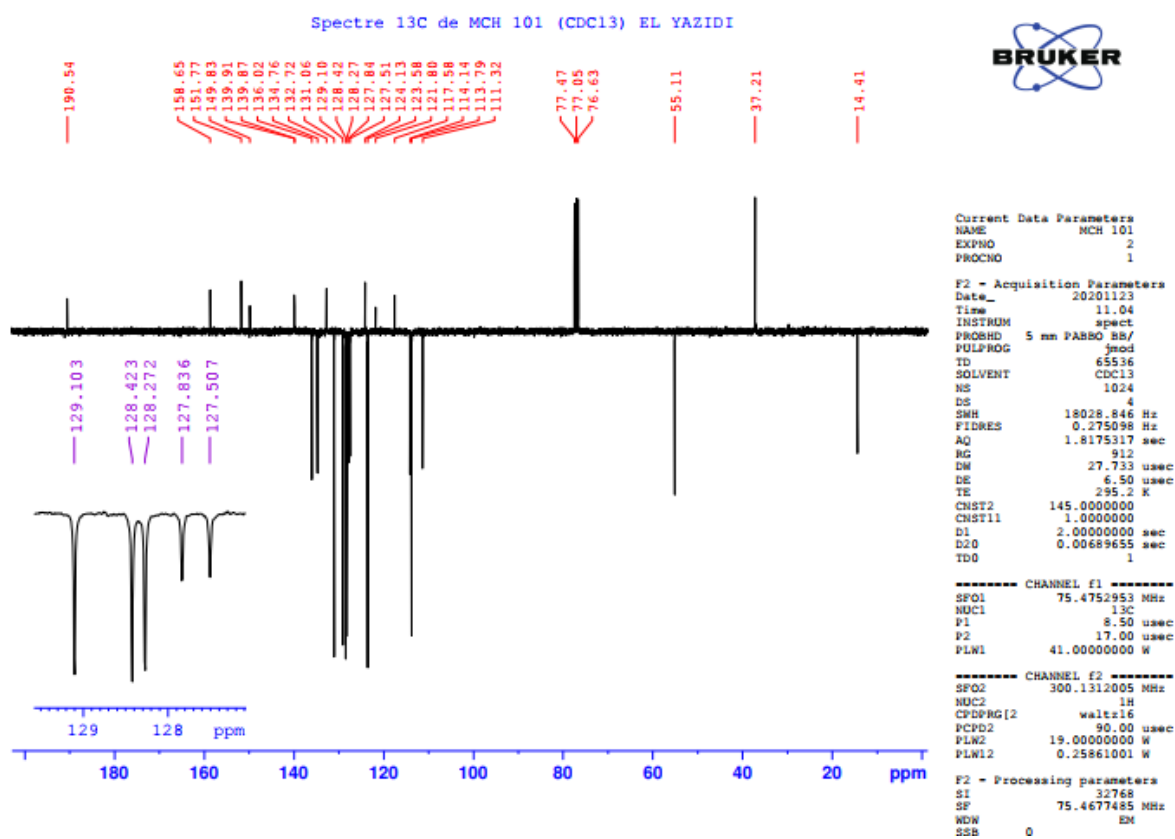

Figure S11. <sup>13</sup>C NMR spectrum (75 MHz, CDCl<sub>3</sub>) of compound (4b)

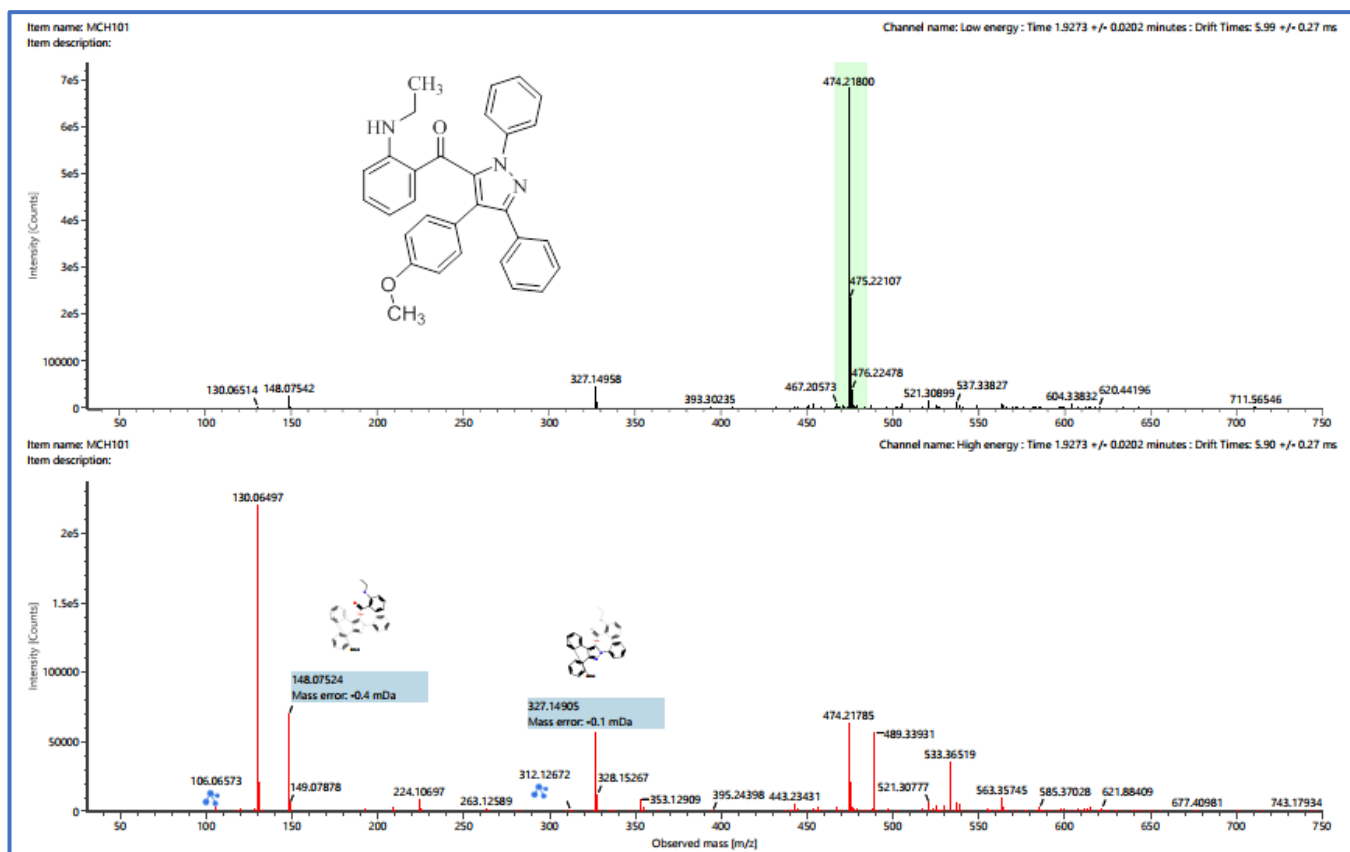

Figure S12. Mass spectrum of compound (4b)

c) 5-(2-benzylaminobenzoyl)-1,3,4-triphenyl-1H-pyrazole (5a)

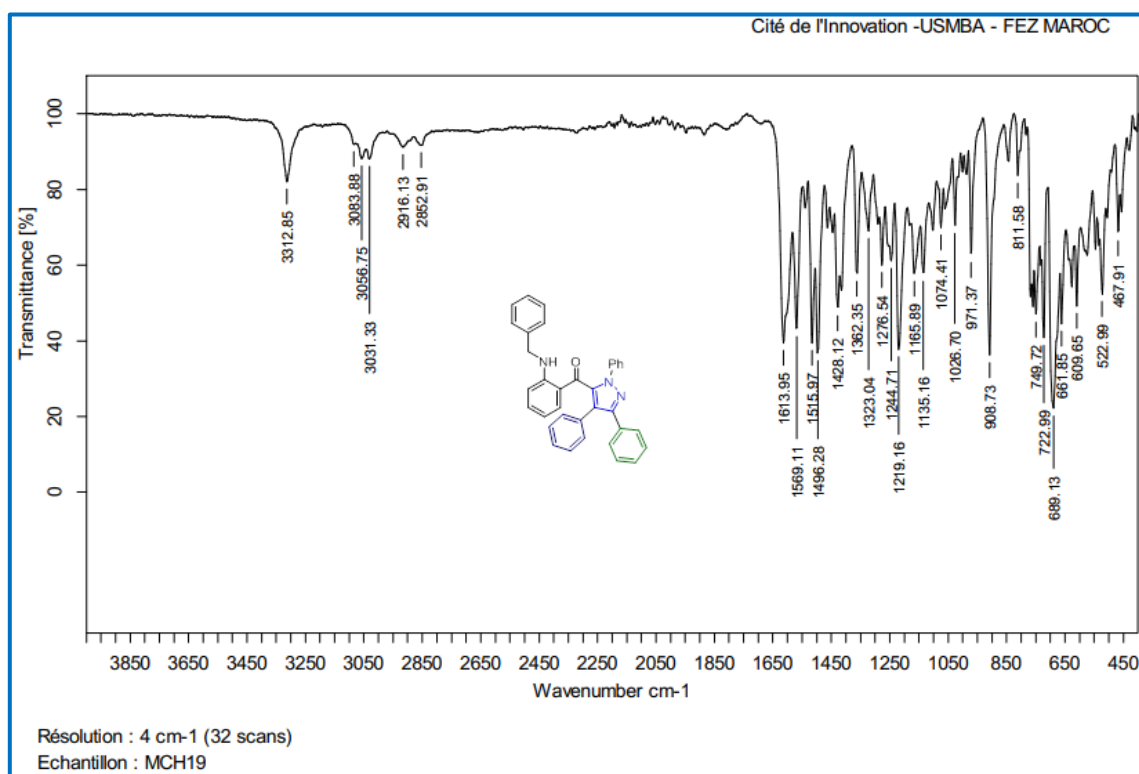

Figure S13. IR spectrum of compound (5a)

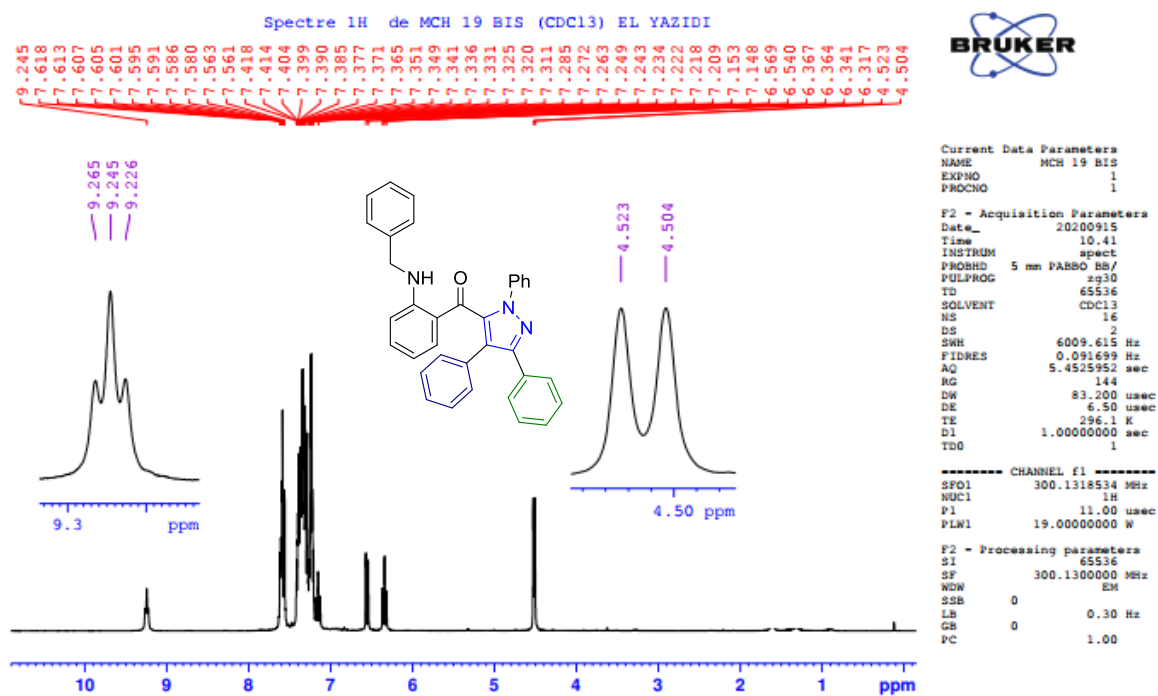

**Figure S14.** <sup>1</sup>H NMR spectrum (300 MHz, CDCl<sub>3</sub>) of compound (5a)

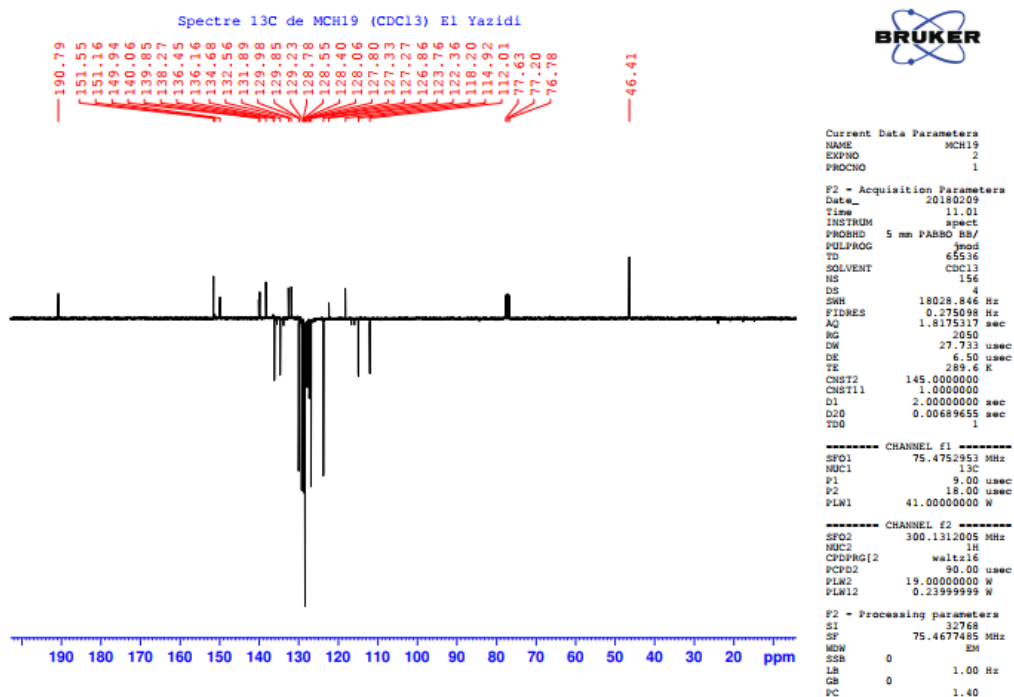

**Figure S15.** <sup>13</sup>C NMR spectrum (75 MHz, CDCl<sub>3</sub>) of compound (5a)

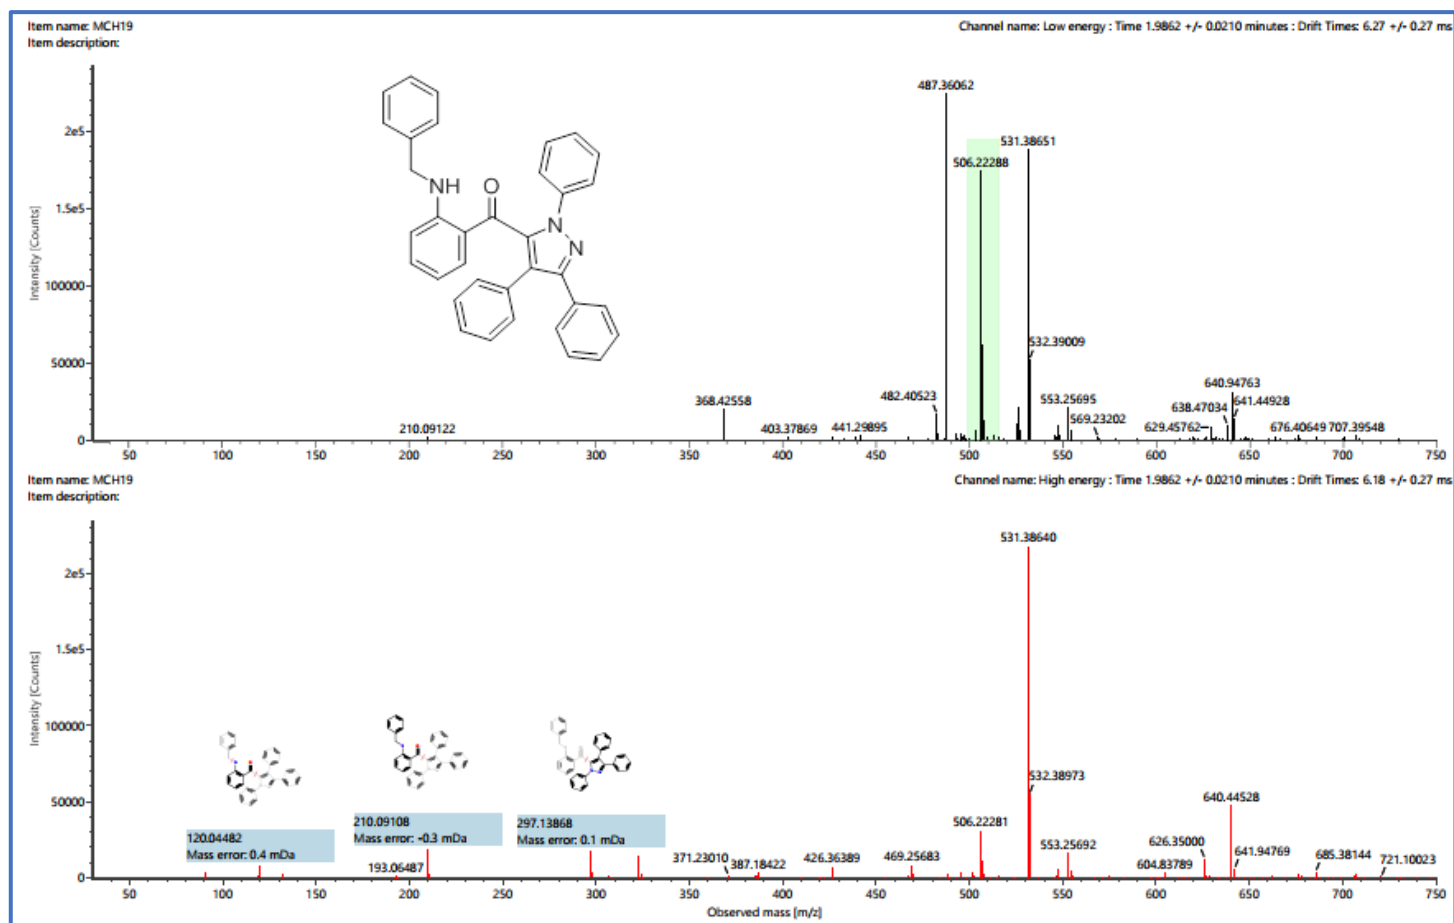

Figure S16. Mass spectrum of compound (5a)

d) 5-(2-benzylaminobenzoyl)-4-(4-methoxyphenyl)-1,3-diphenyl-1H-pyrazole (5b)

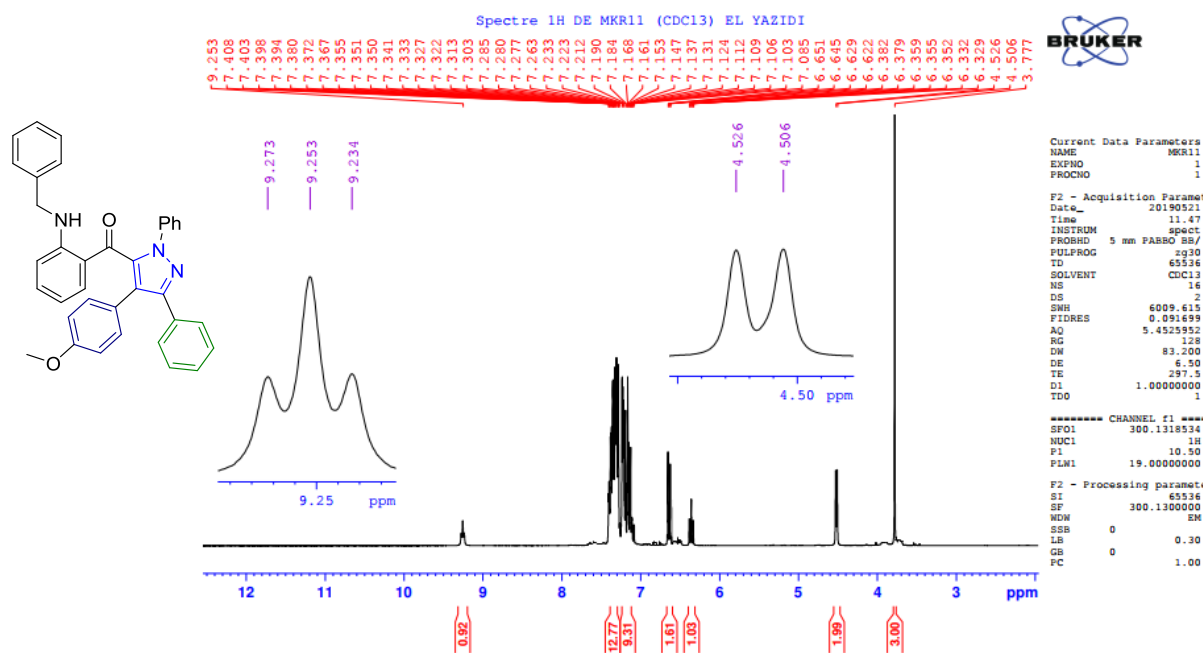

Figure S17. <sup>1</sup>H NMR spectrum (300 MHz, CDCl<sub>3</sub>) of compound (5b)

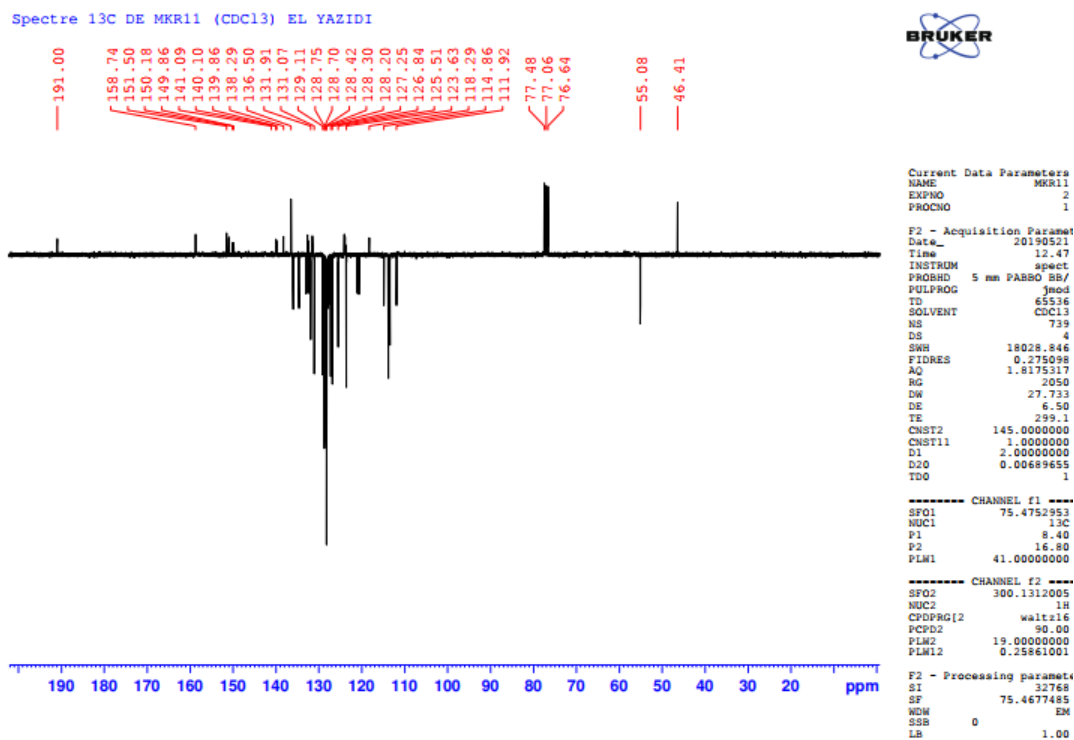

Figure S18. <sup>13</sup>C NMR spectrum (75 MHz, CDCl<sub>3</sub>) of compound (5b)

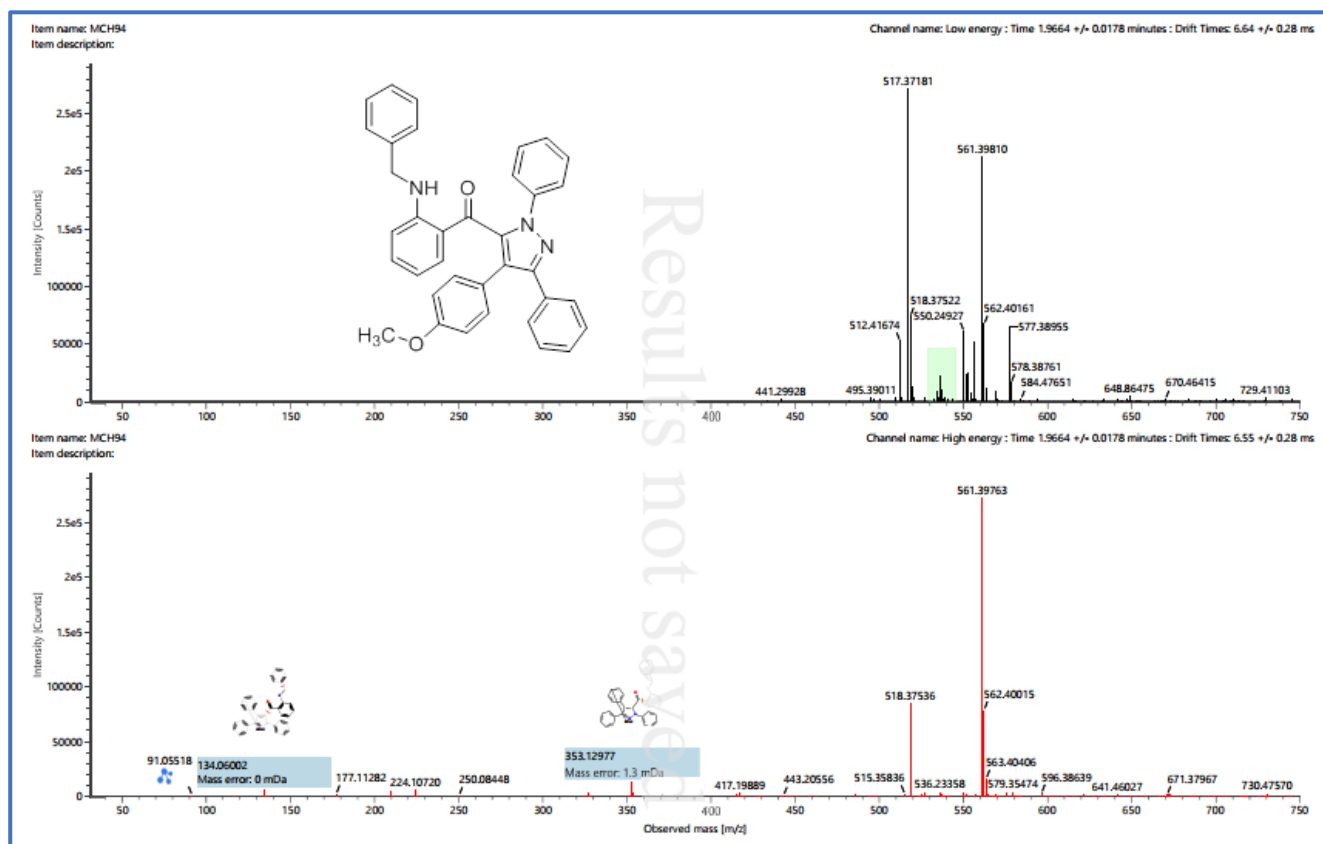

Figure S 19. Mass spectrum of compound (5b)



## e) 5-(2-benzylaminobenzoyl)-4-(4-chlorophenyl)-1,3-diphenyl-1H-pyrazole (5c)

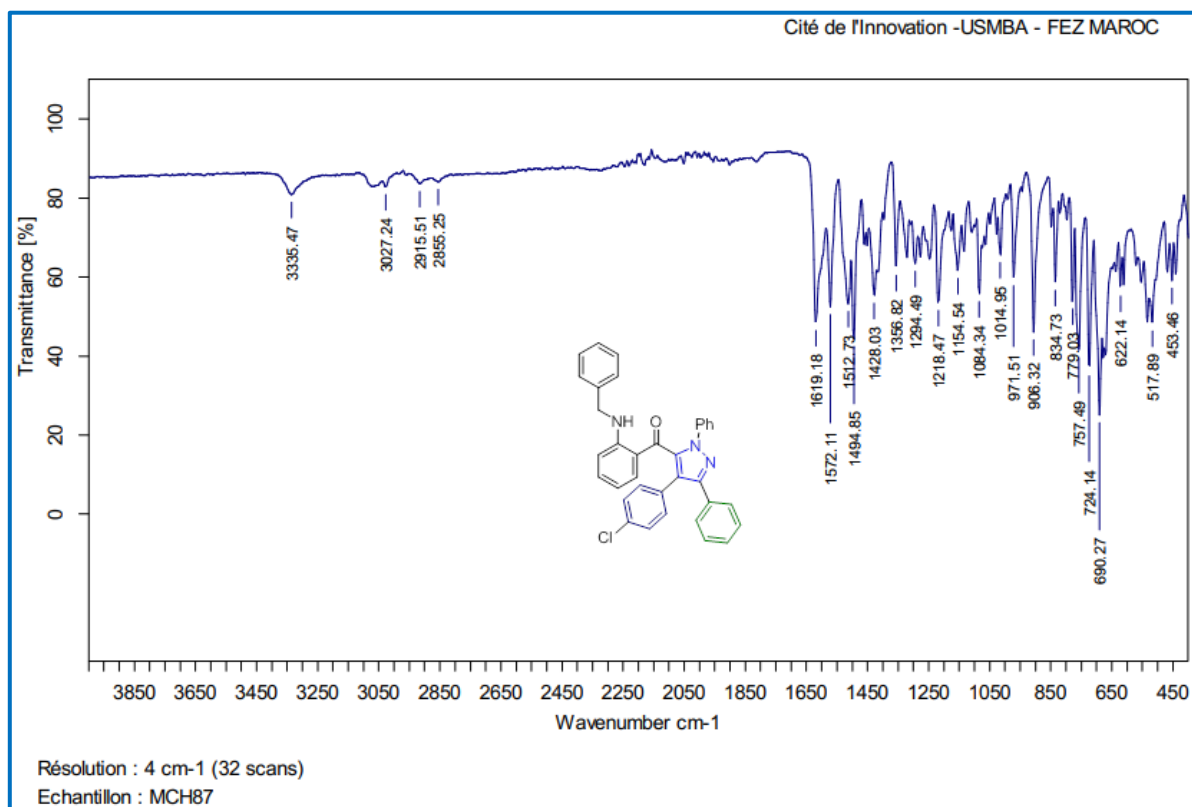

Figure S20. IR spectrum of compound (5c)

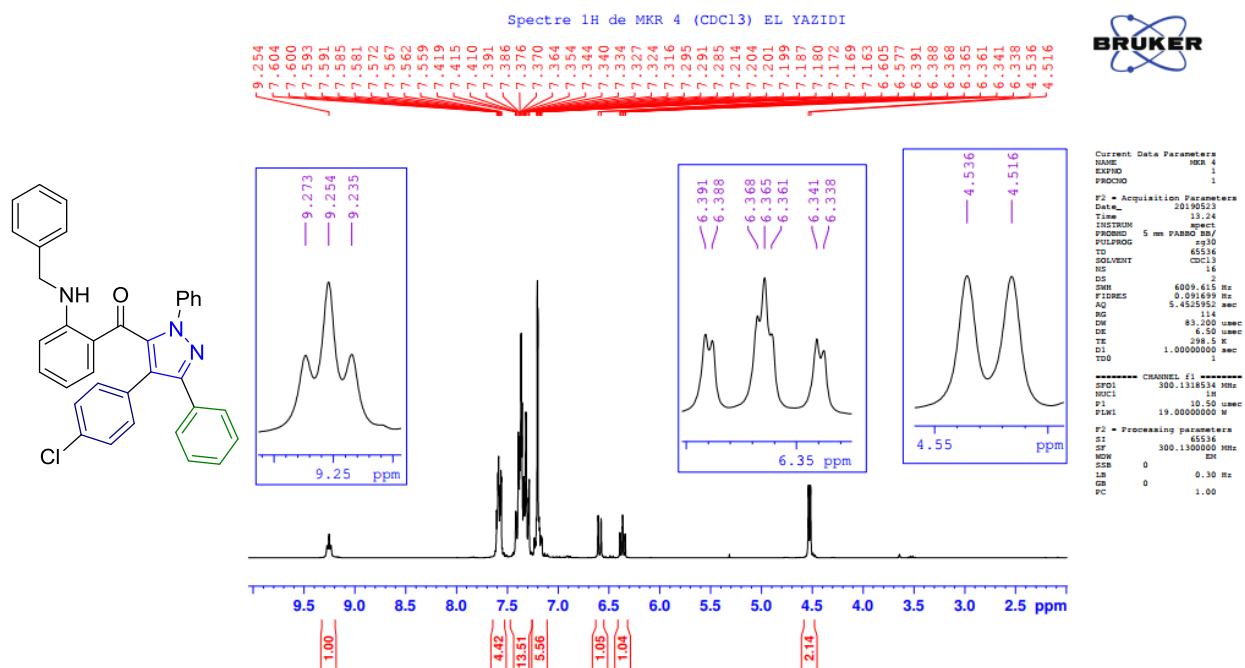Figure S21. <sup>1</sup>H NMR spectrum (300 MHz, CDCl<sub>3</sub>) of compound (5c)

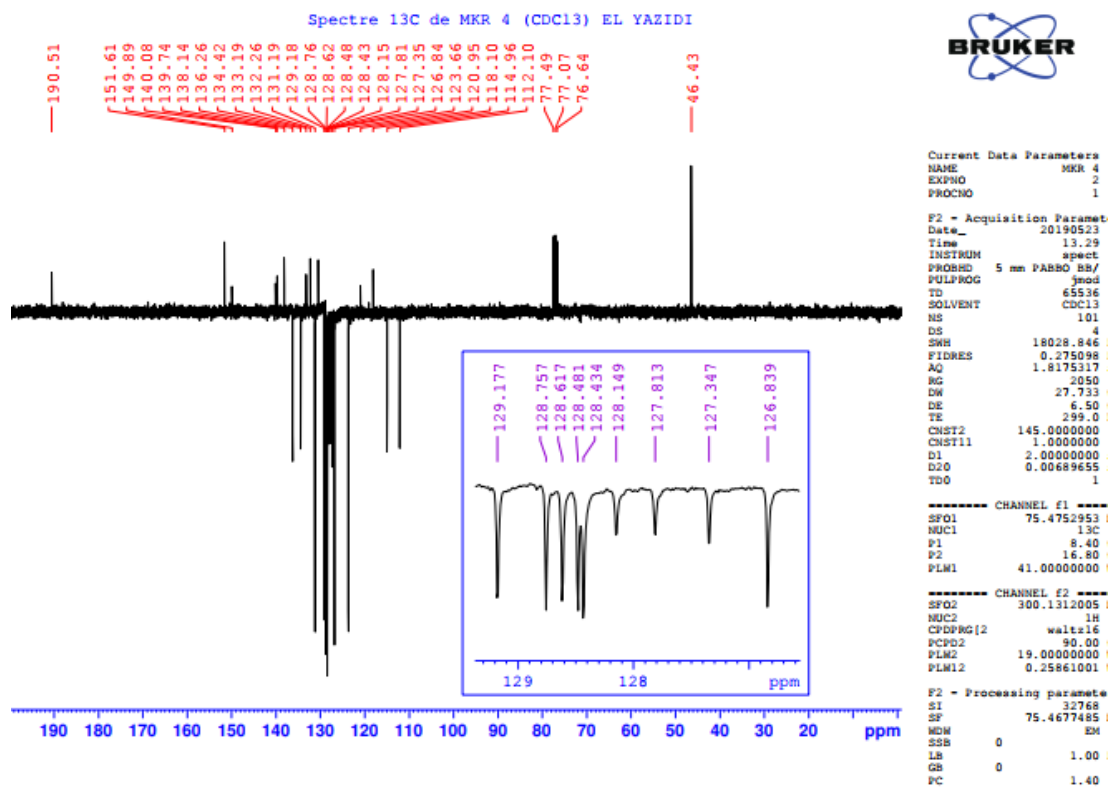

Figure S22. <sup>13</sup>C NMR spectrum (75 MHz, CDCl<sub>3</sub>) of compound (5c)

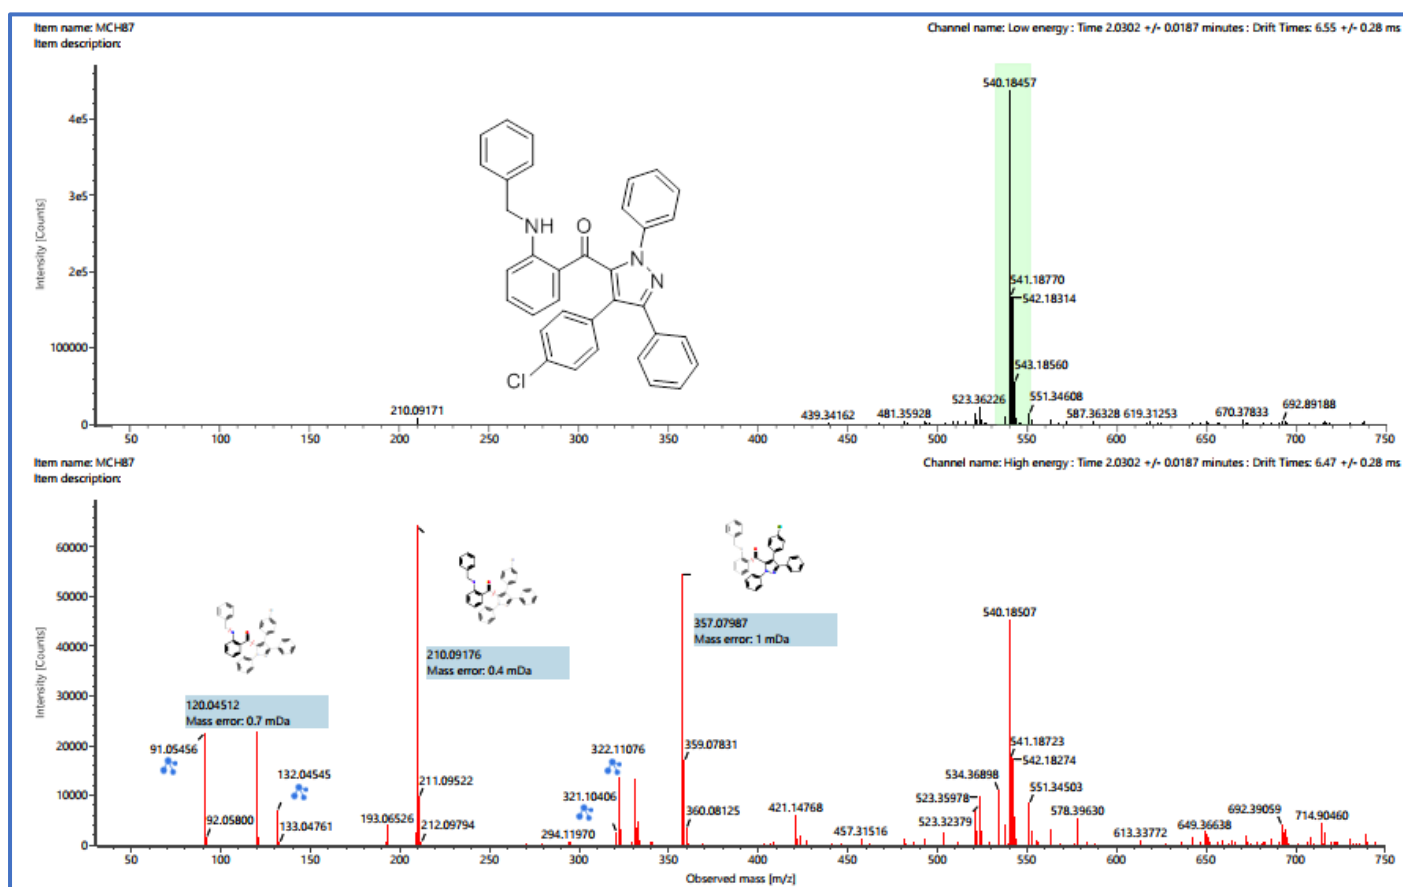

Figure S23. Mass spectrum of compound (5c)

## f) 5-(2-benzylaminobenzoyl)-1,3-diphenyl-4-(p-tolyl)-1H-pyrazole (5d)

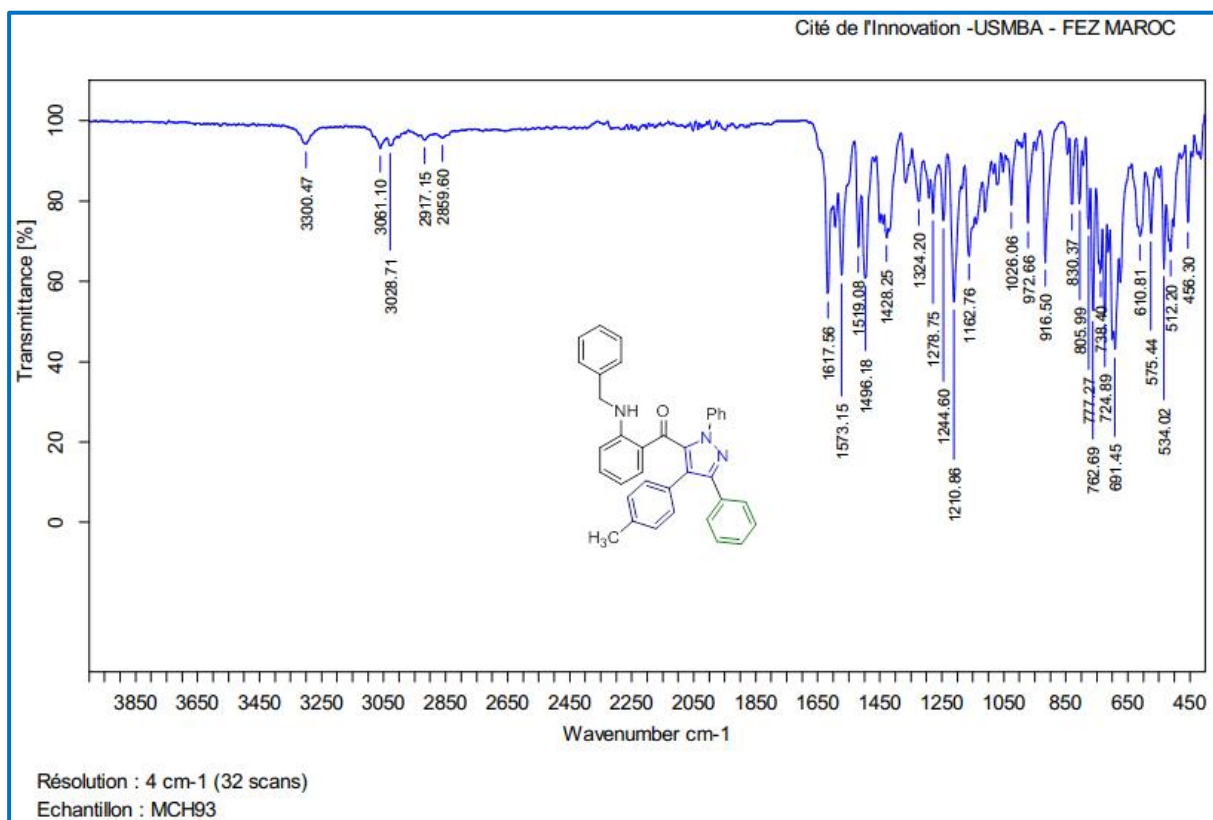

Figure S24. IR spectrum of compound (5d)

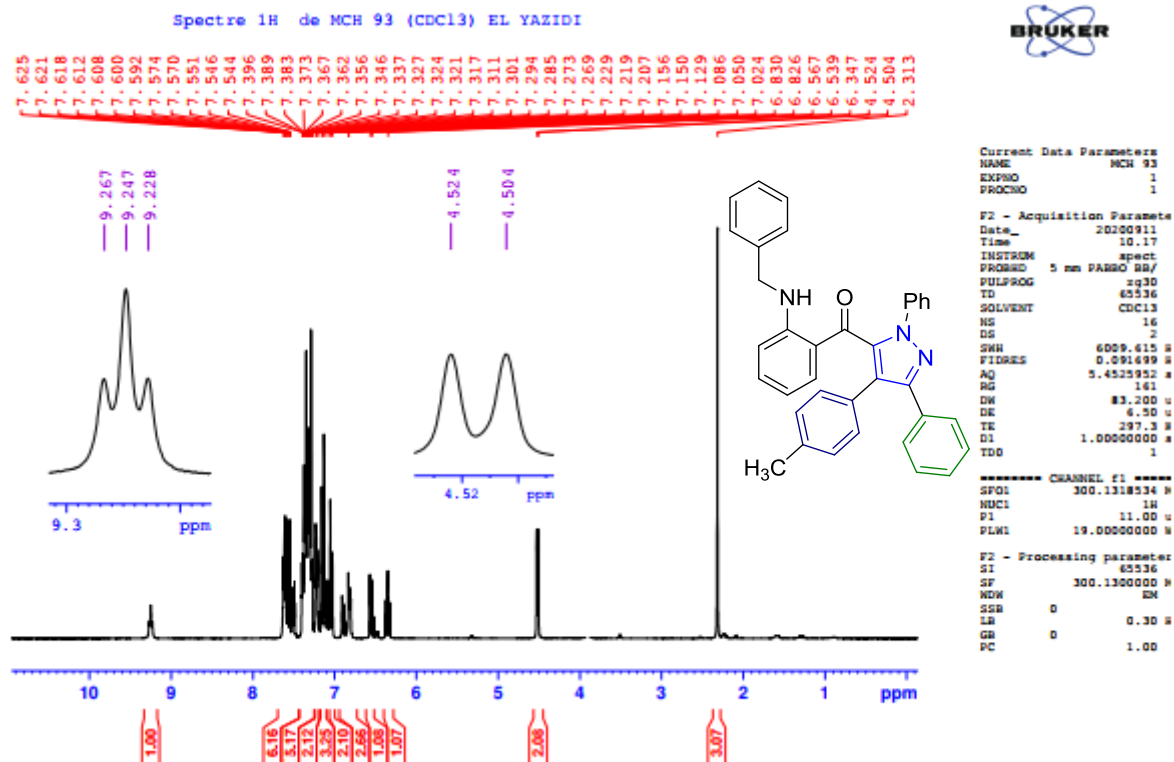Figure S25. <sup>1</sup>H NMR spectrum (300 MHz, CDCl<sub>3</sub>) of compound (5d)

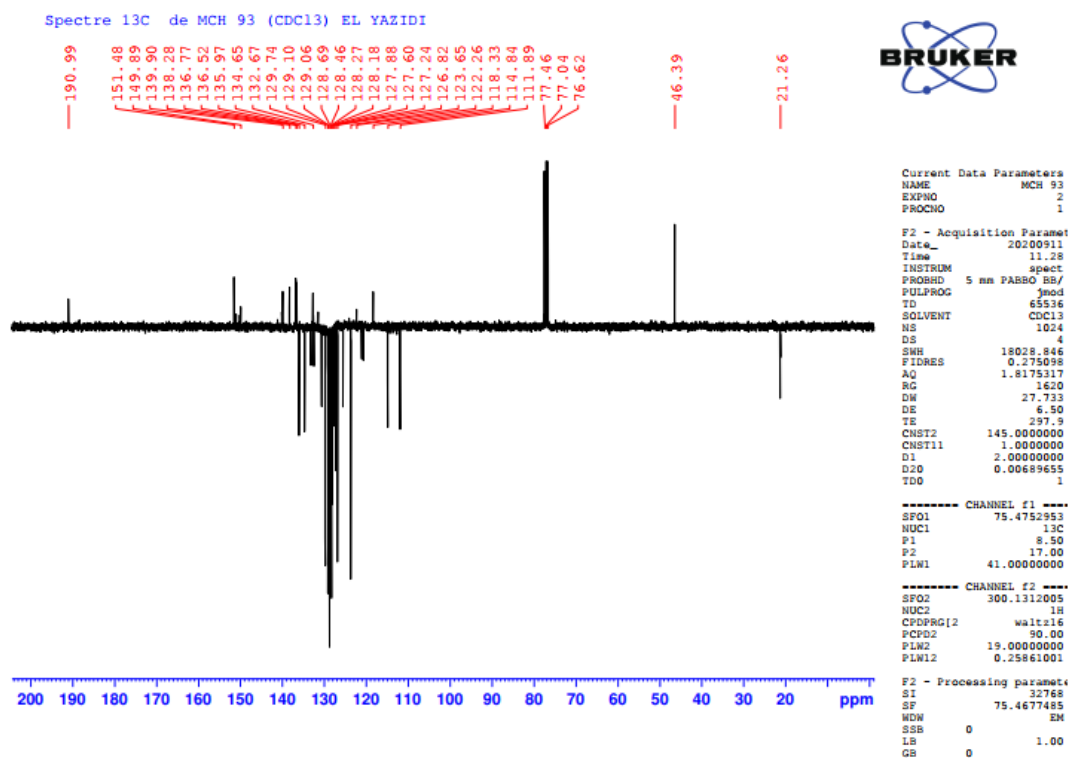

Figure S26.  $^{13}\text{C}$  NMR spectrum (75 MHz,  $\text{CDCl}_3$ ) of compound (**5d**)

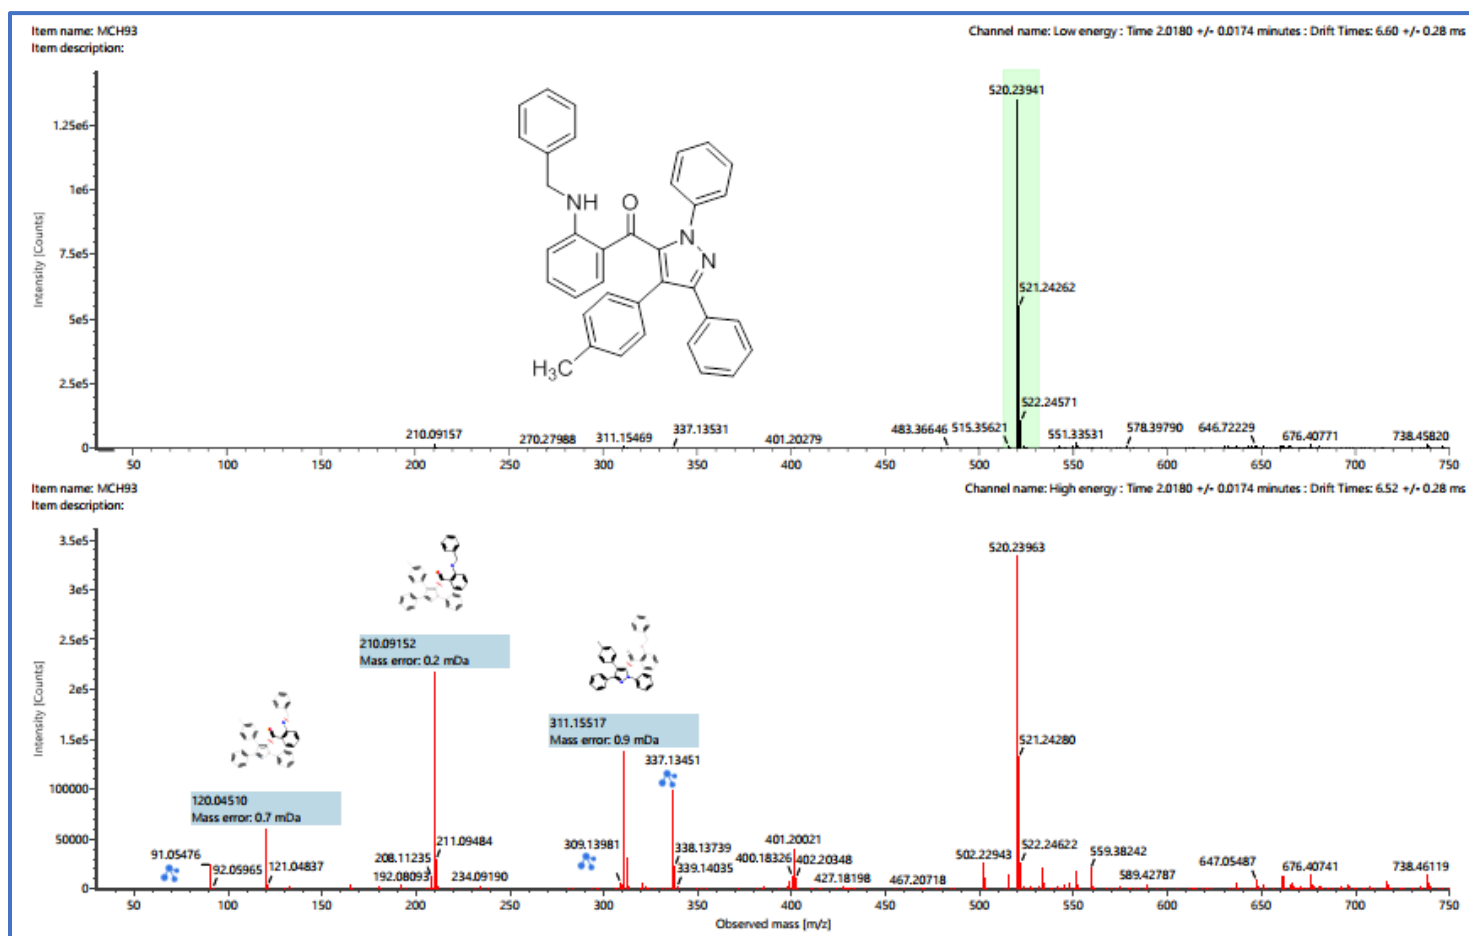

Figure S27. Mass spectrum of compound (**5d**)

## g) 5-(2-allylaminobenzoyl)-1,3,4-triphenyl-1H-pyrazole 6a

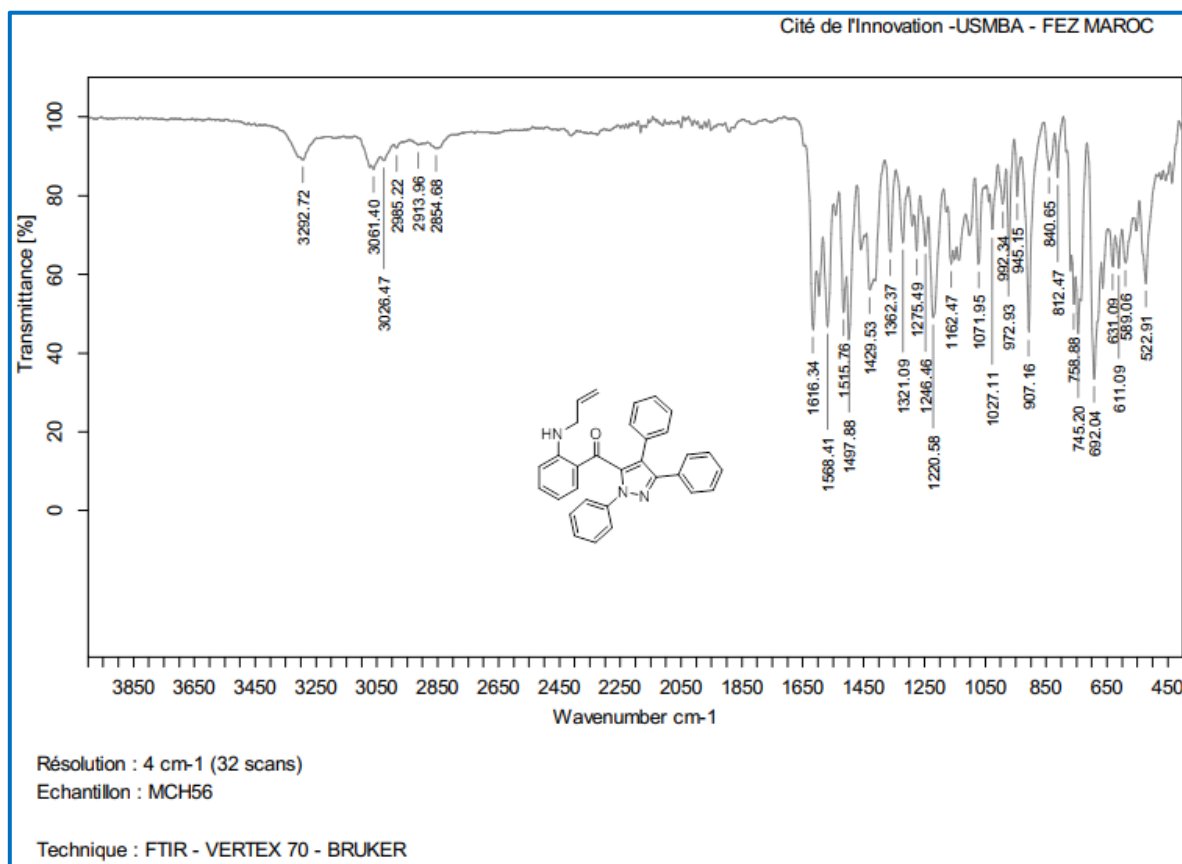

Figure S28. IR spectrum of compound (6a)

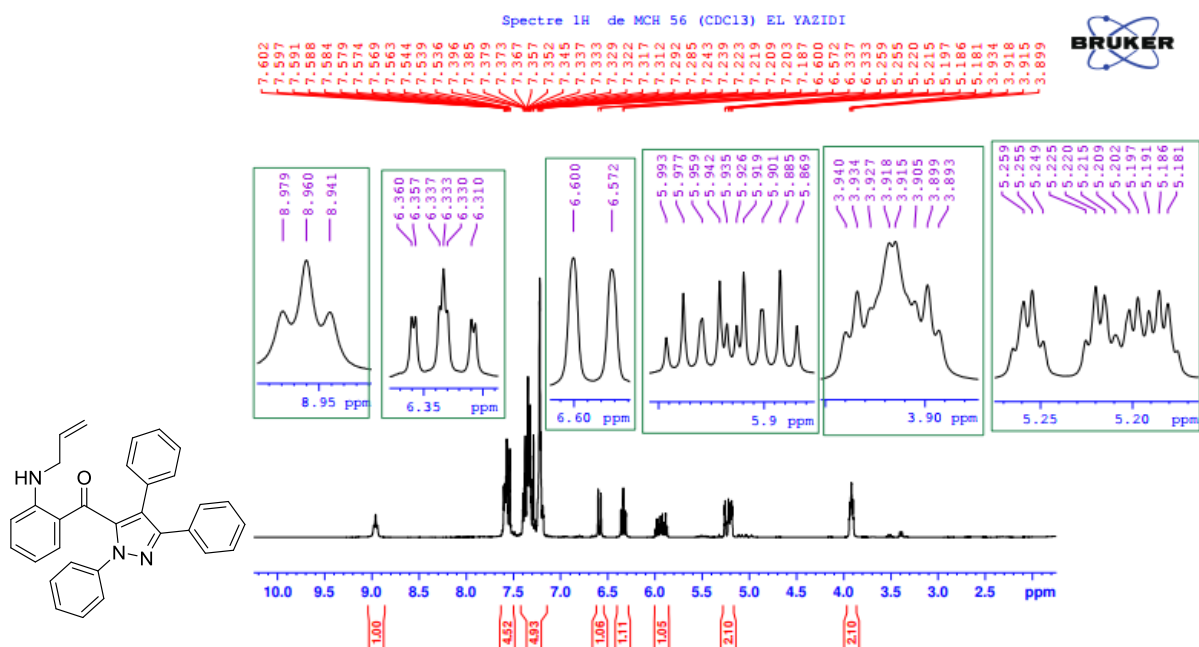Figure S29. <sup>1</sup>H NMR spectrum (300 MHz, CDCl<sub>3</sub>) of compound (6a)

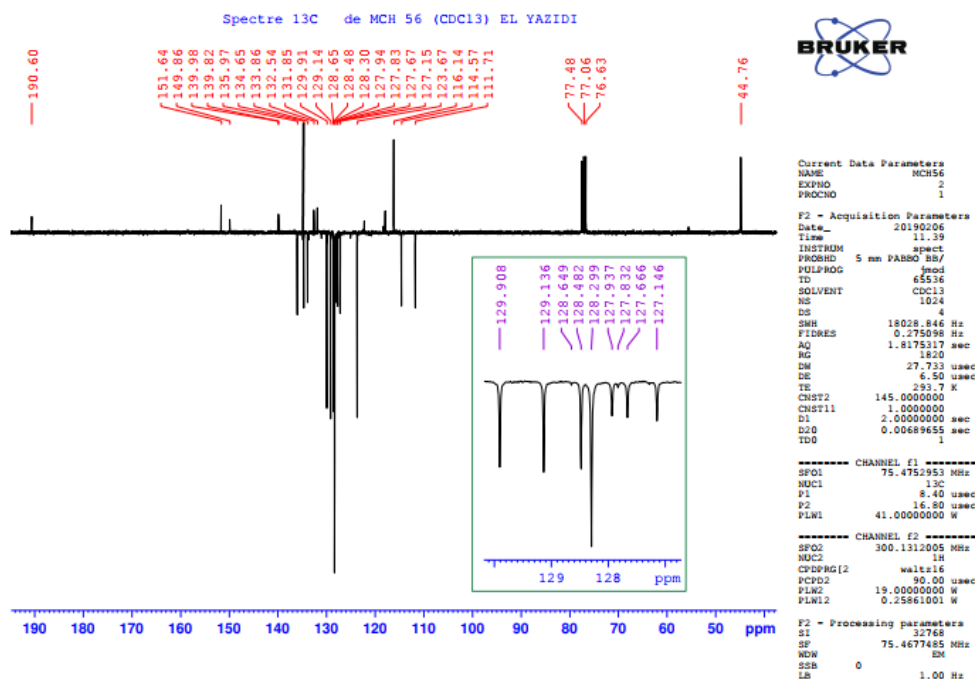

Figure S30. <sup>13</sup>C NMR spectrum (75 MHz, CDCl<sub>3</sub>) of compound (6a)

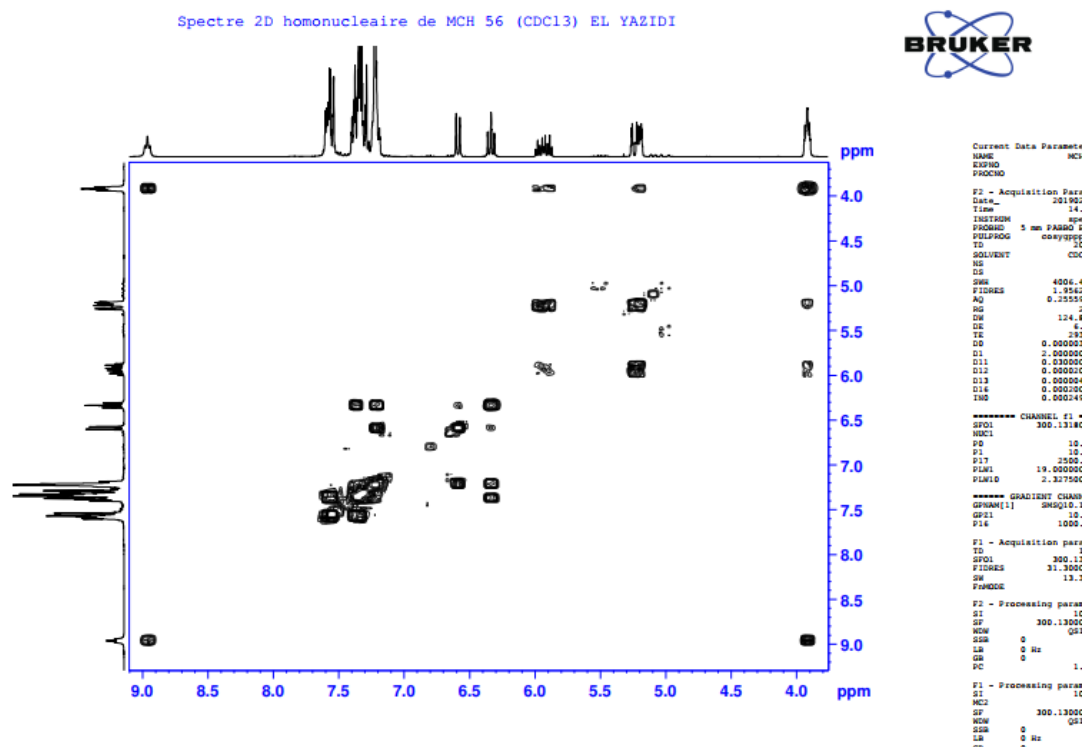

Figure S31. 2D-NMR spectrum of compound (6a)





## h) 5-(2-allylaminobenzoyl)-4-(4-methoxyphenyl)-1,3-diphenyl-1H-pyrazole (6b)

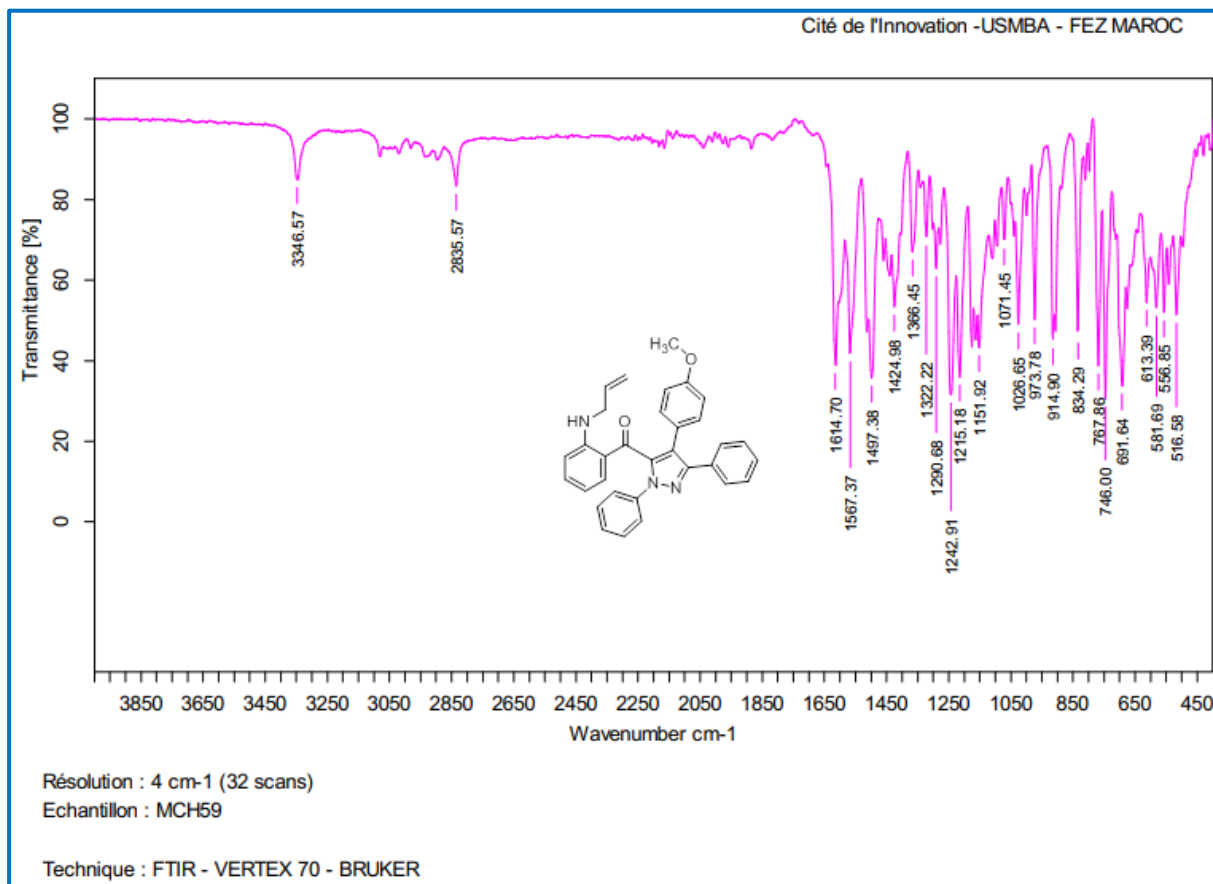

Figure S34. IR spectrum of compound (6b)

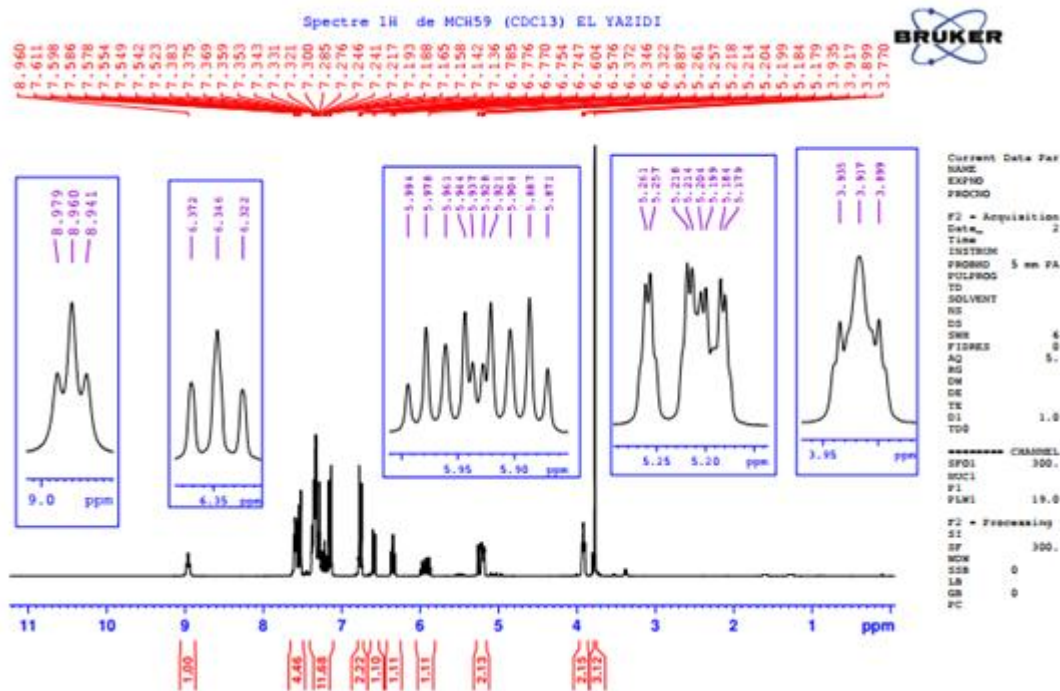Figure S35.  $^1\text{H}$  NMR spectrum (300 MHz,  $\text{CDCl}_3$ ) of compound (6b)



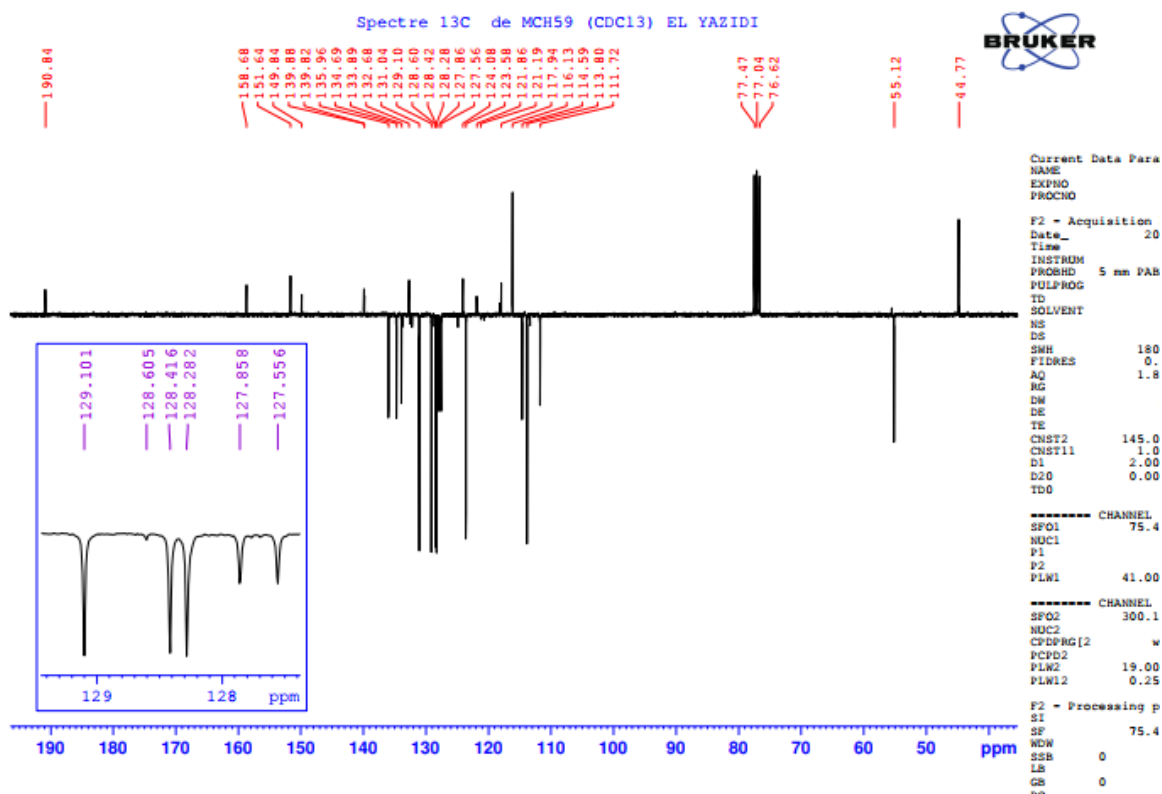

Figure S36. <sup>13</sup>C NMR spectrum (75 MHz, CDCl<sub>3</sub>) of compound (6b)

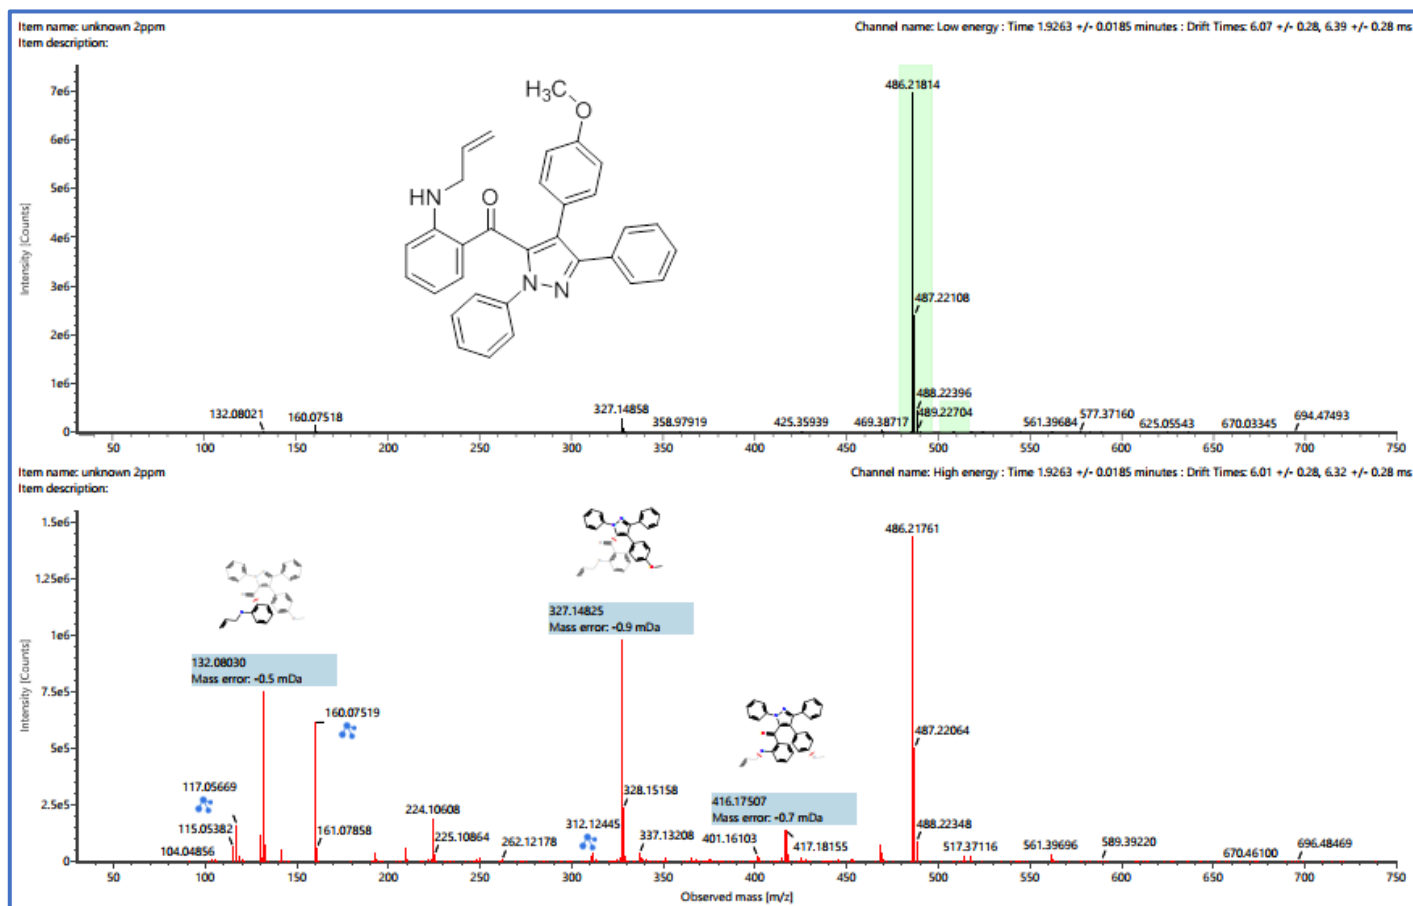

Figure S37. Mass spectrum of compound (6b)

## i) 5-(2-allylaminobenzoyl)-4-(4-chlorophenyl)-1,3-diphenyl-1H-pyrazole (6c)

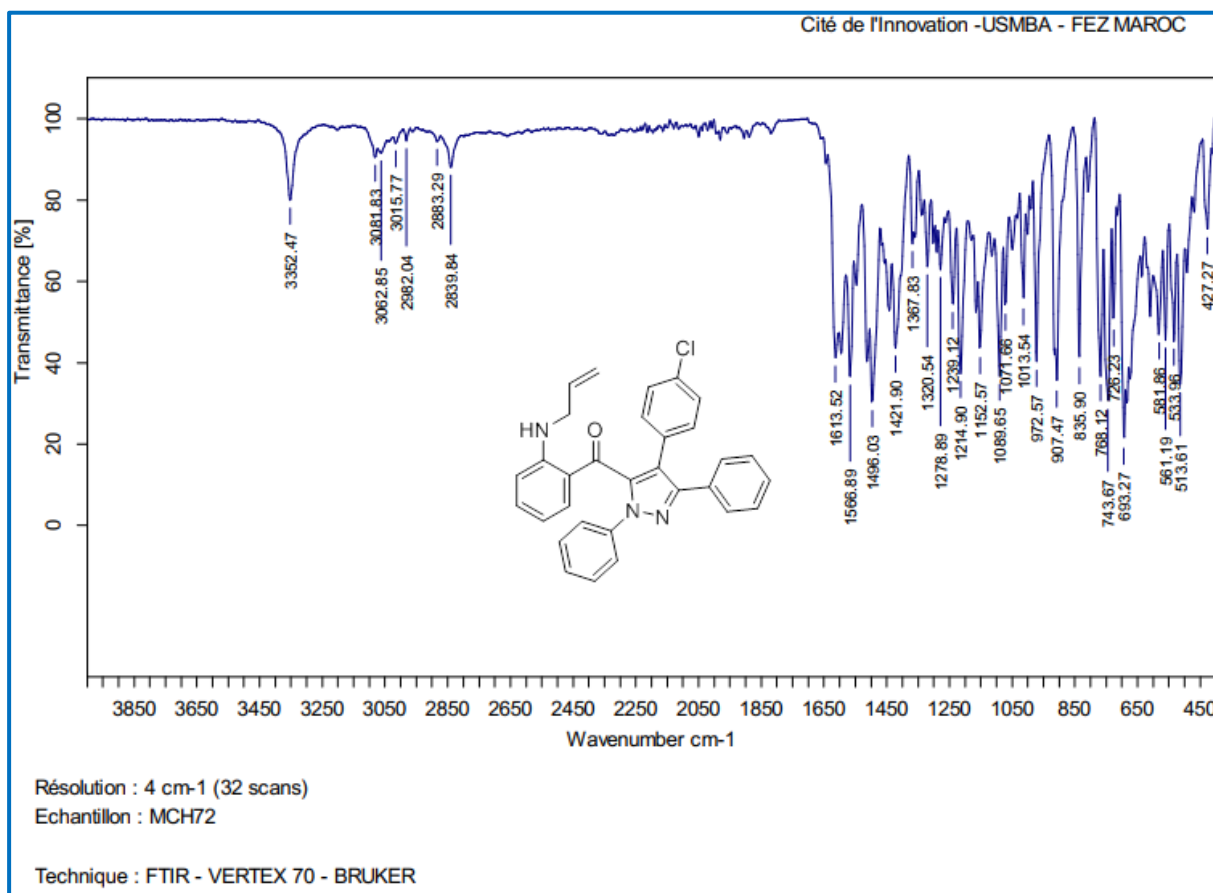

Figure S38. IR spectrum of compound (6c)

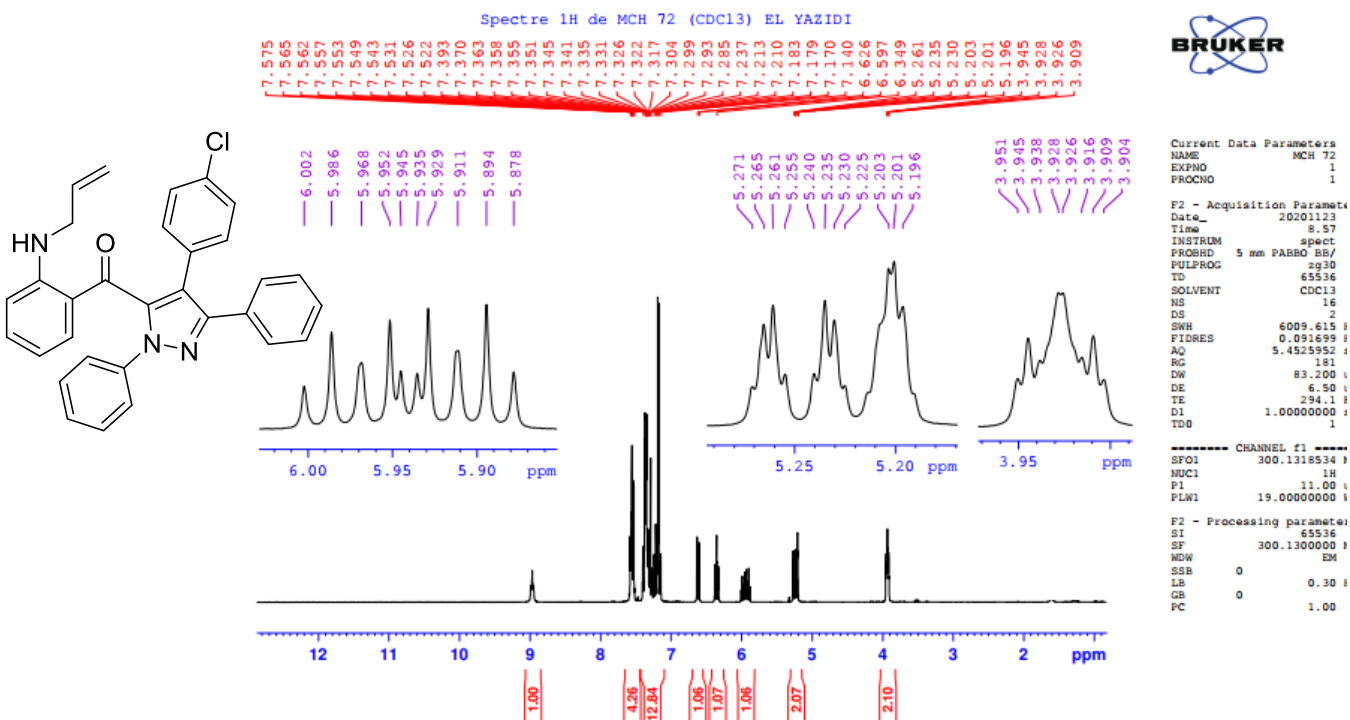Figure S39. <sup>1</sup>H NMR spectrum (300 MHz, CDCl<sub>3</sub>) of compound (6c)

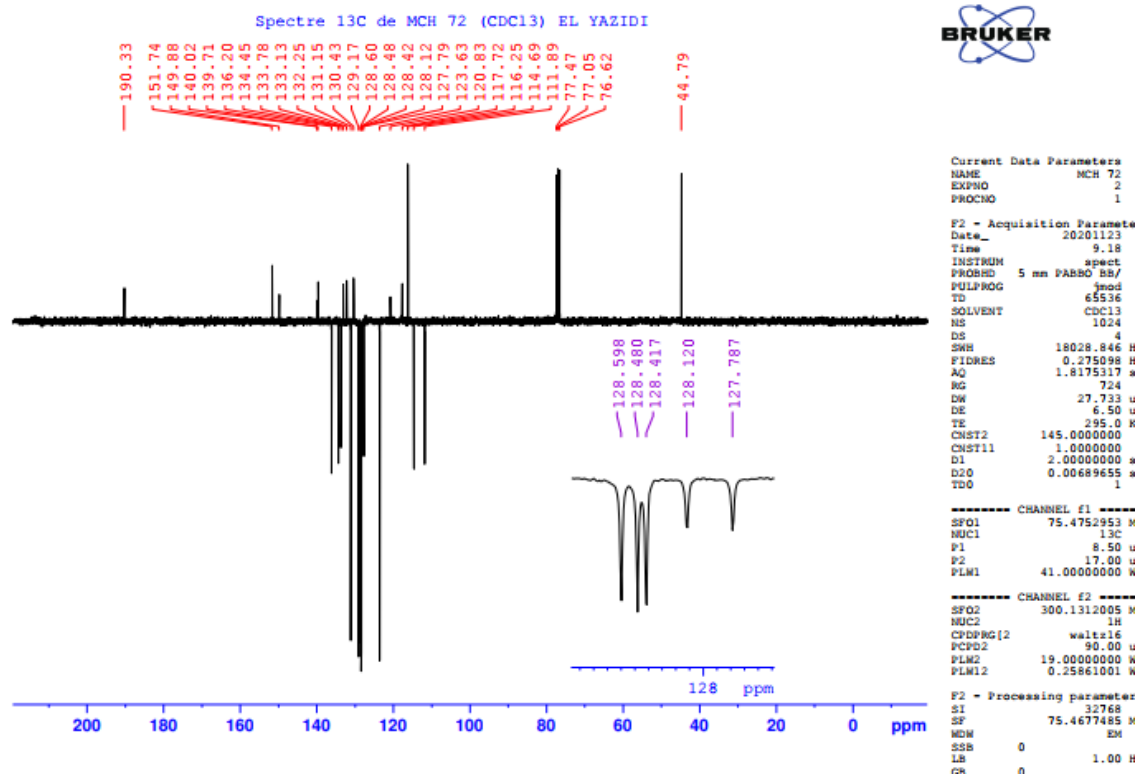

Figure S40.  $^{13}\text{C}$  NMR spectrum (75 MHz,  $\text{CDCl}_3$ ) of compound (6c)

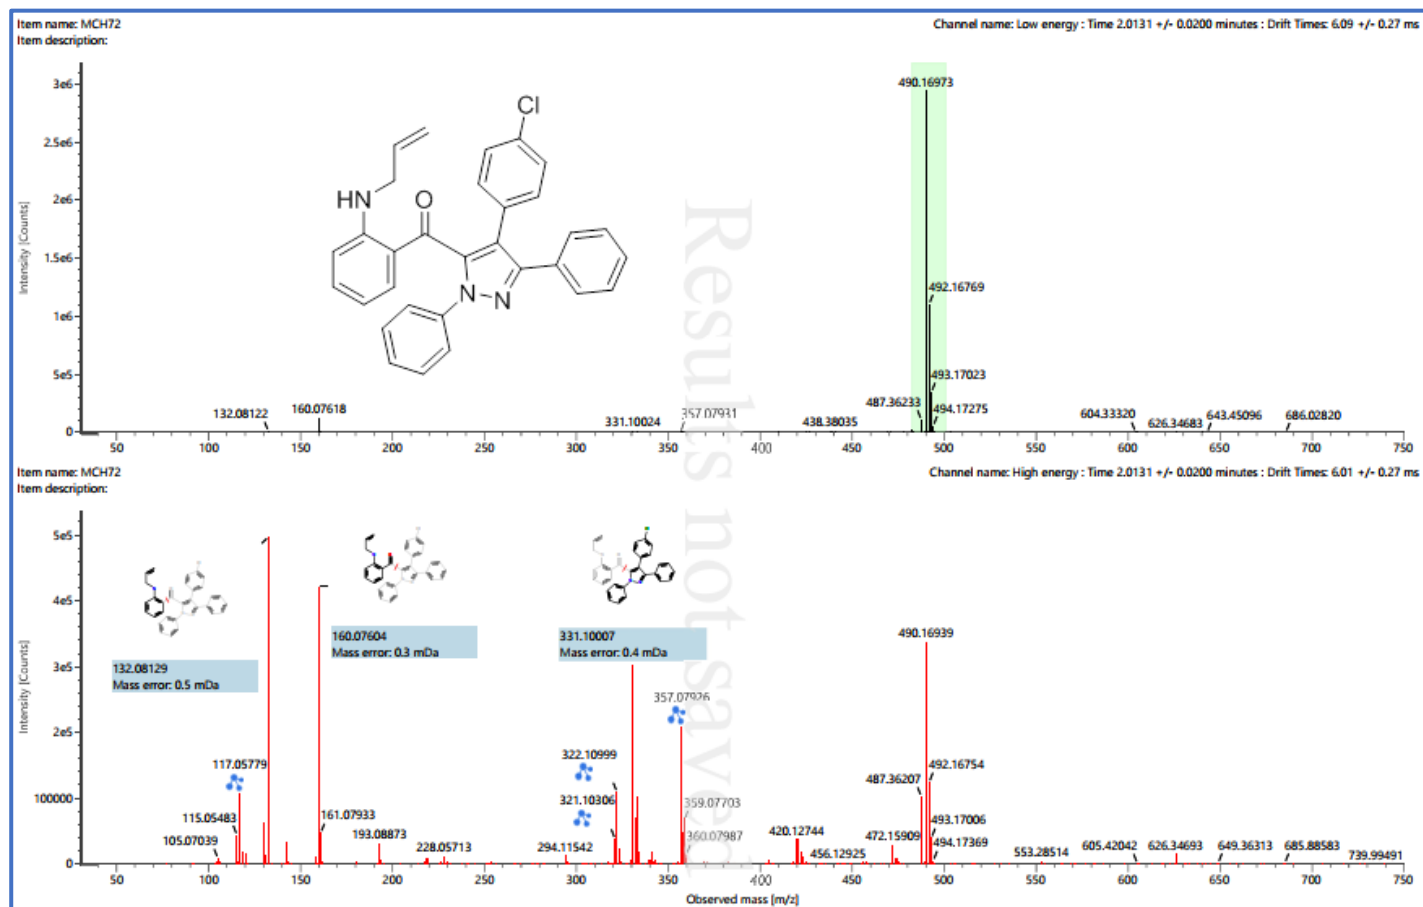

Figure S41. Mass spectrum of compound (6c)

## j) 5-(2-propargylaminobenzoyl)-1,3,4-triphenyl-1H-pyrazole (7a)

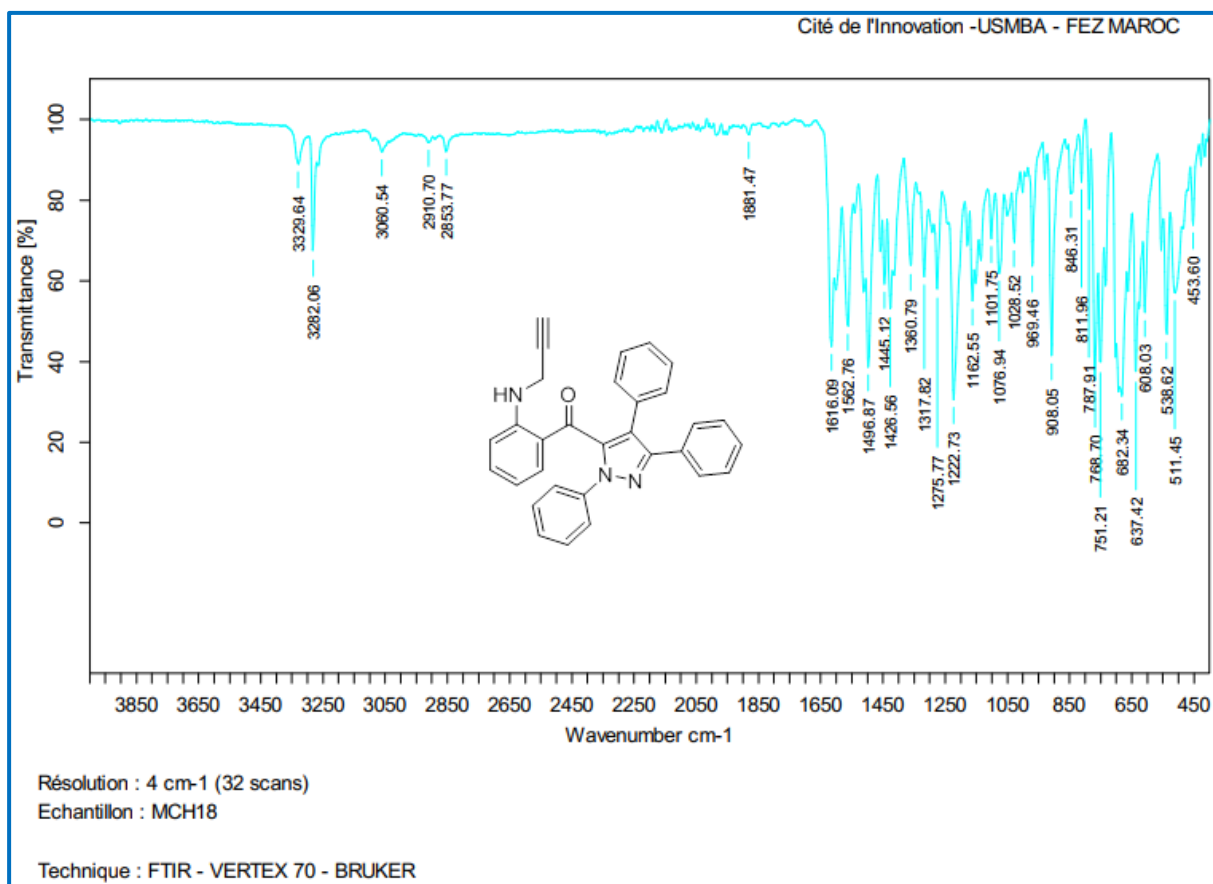

Figure S42. IR spectrum of compound (7a)

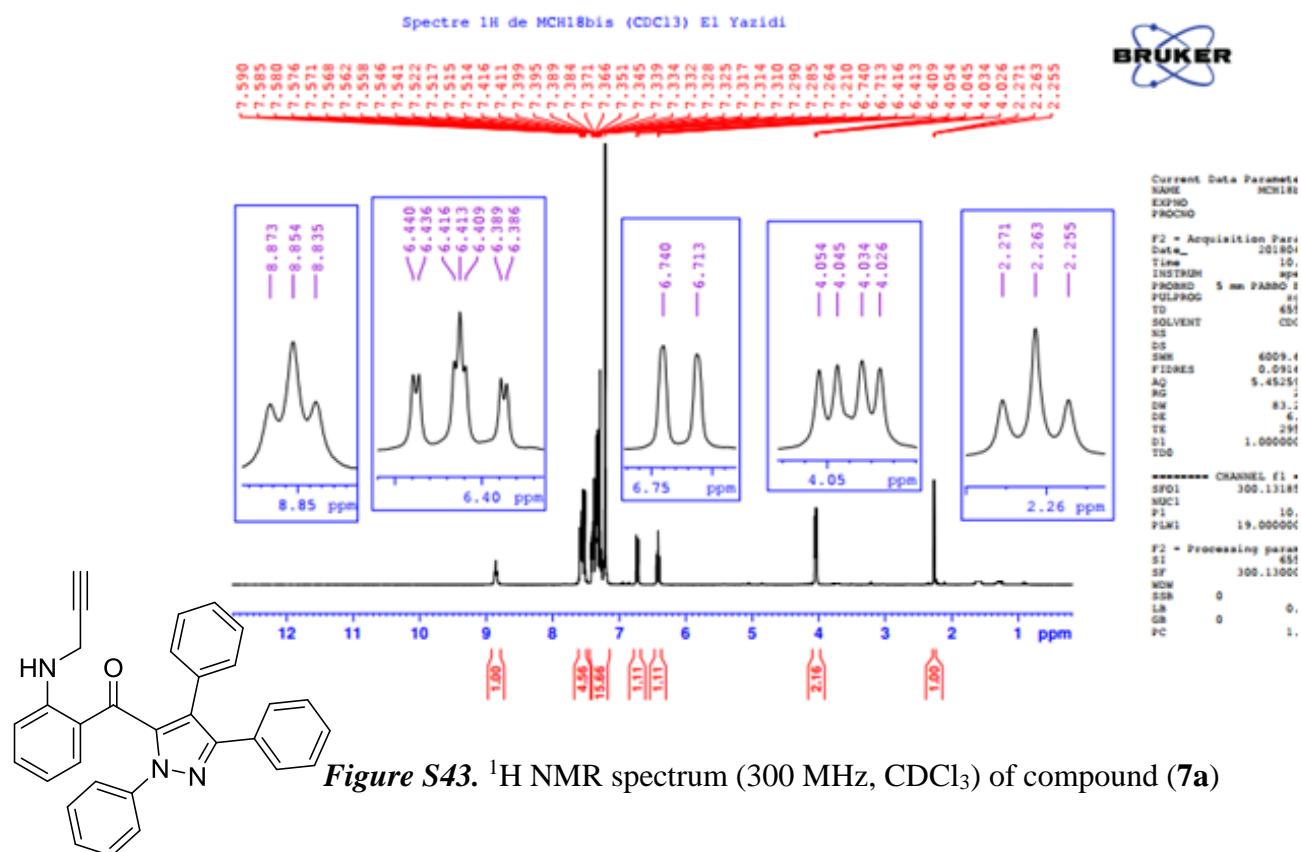Figure S43. <sup>1</sup>H NMR spectrum (300 MHz, CDCl<sub>3</sub>) of compound (7a)

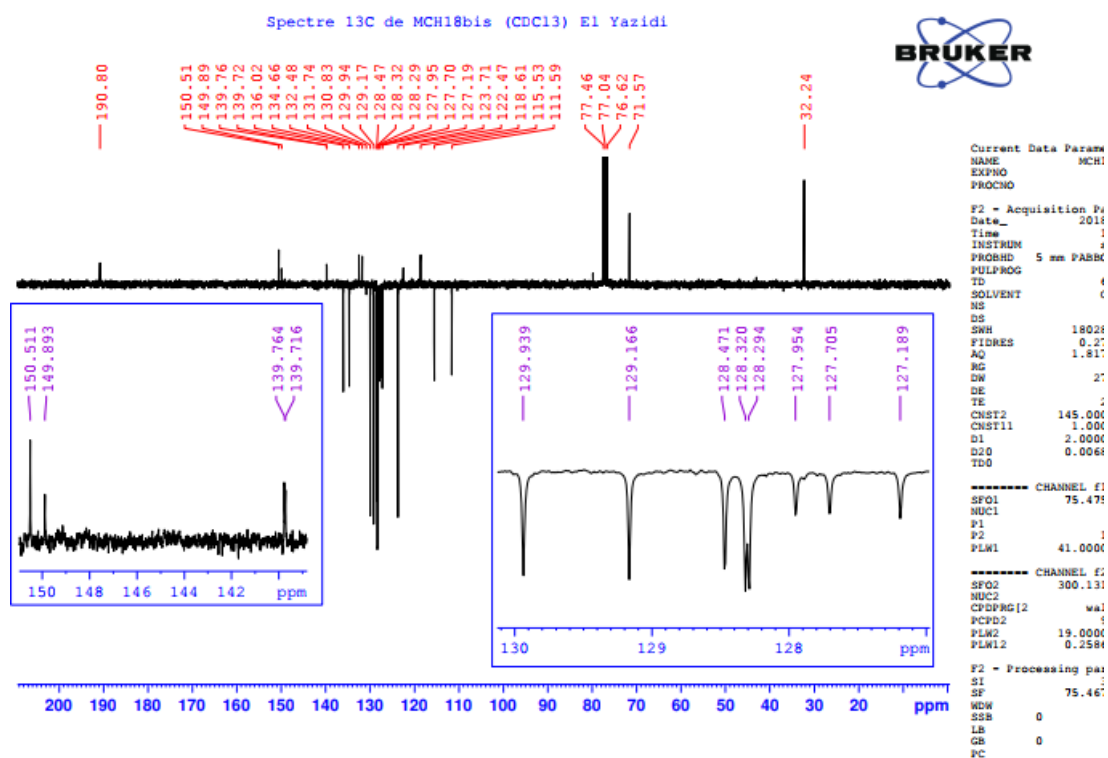

Figure S44. <sup>13</sup>C NMR spectrum (75 MHz, CDCl<sub>3</sub>) of compound (7a)

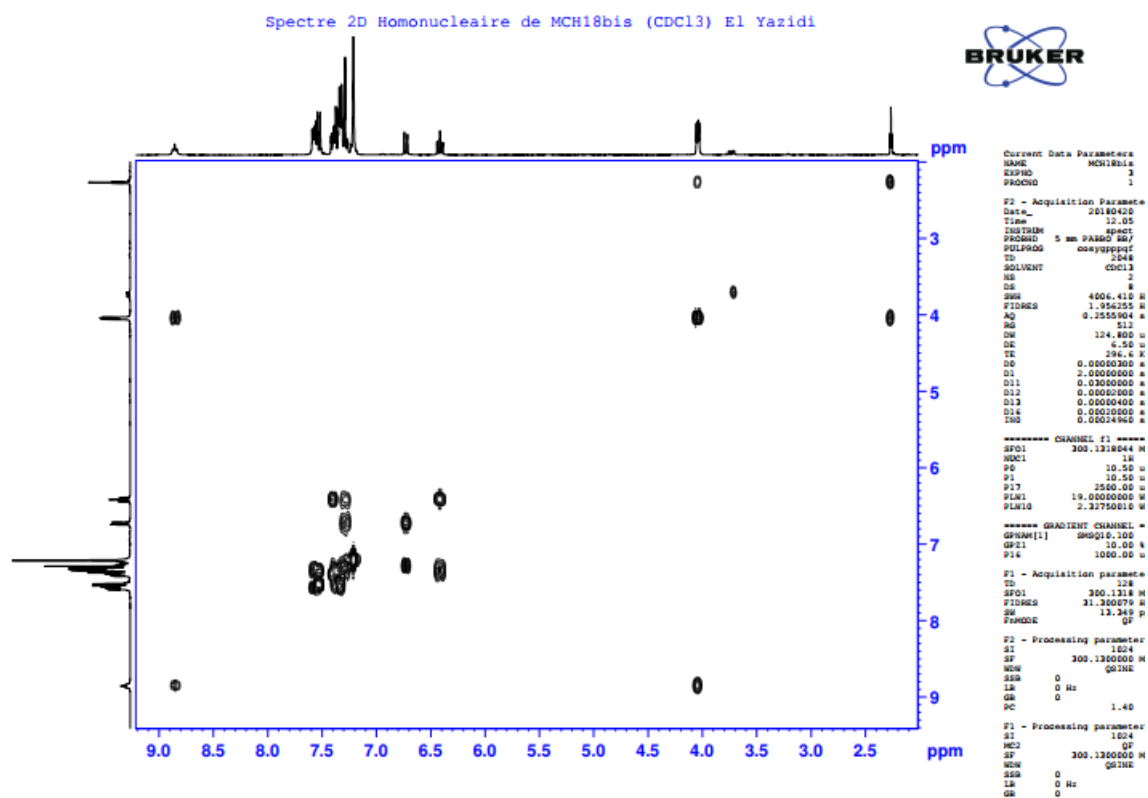

Figure S45. 2D-NMR spectrum of compound (7a)



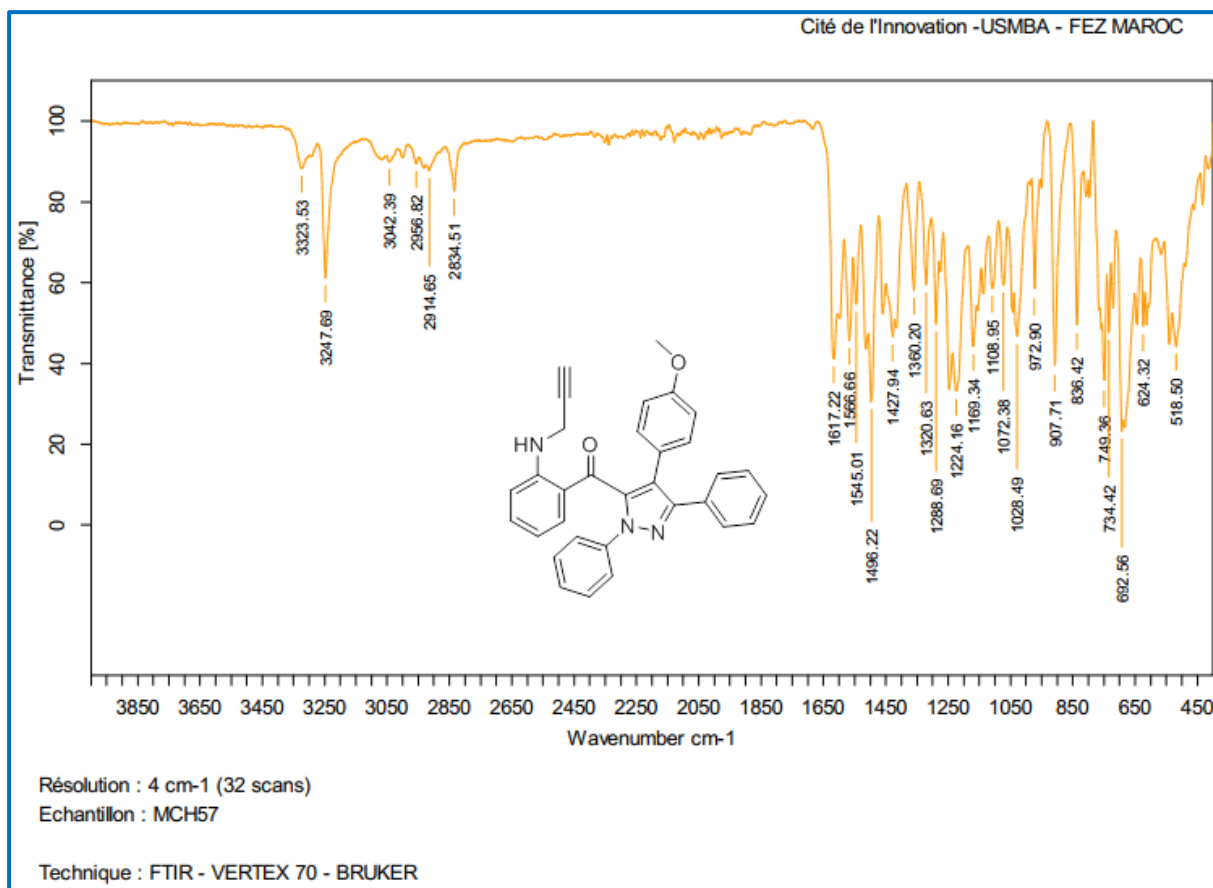

Figure S48. IR spectrum of compound (7b)

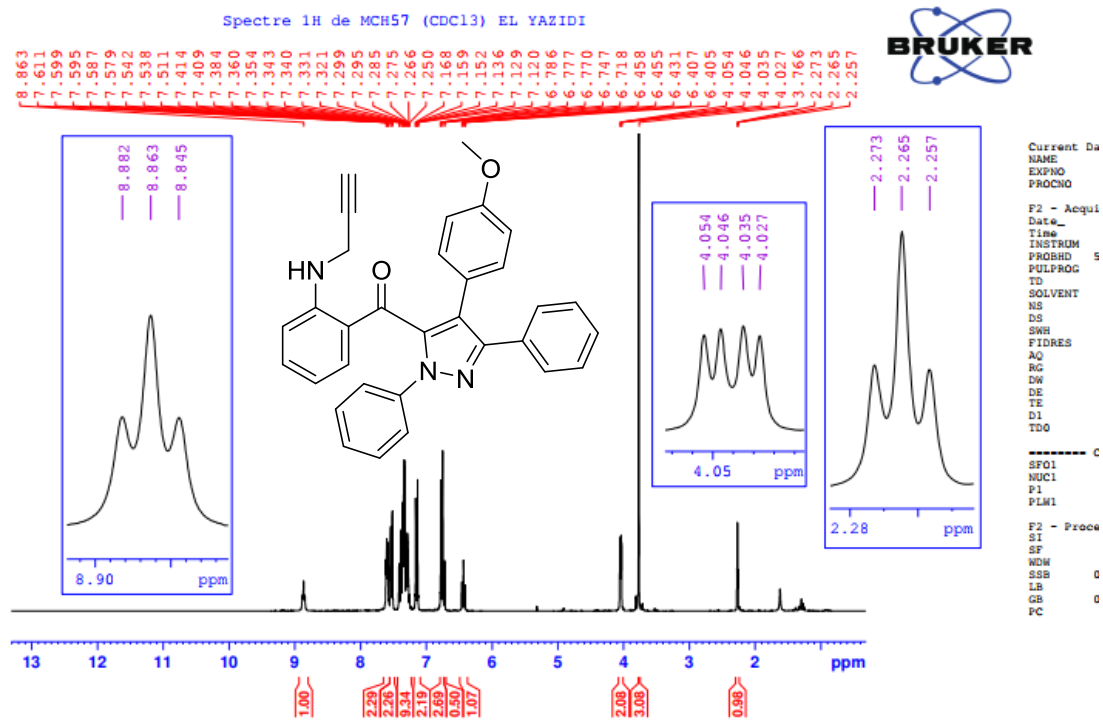

Figure S49. <sup>1</sup>H NMR spectrum (300 MHz, CDCl<sub>3</sub>) of compound (7b)



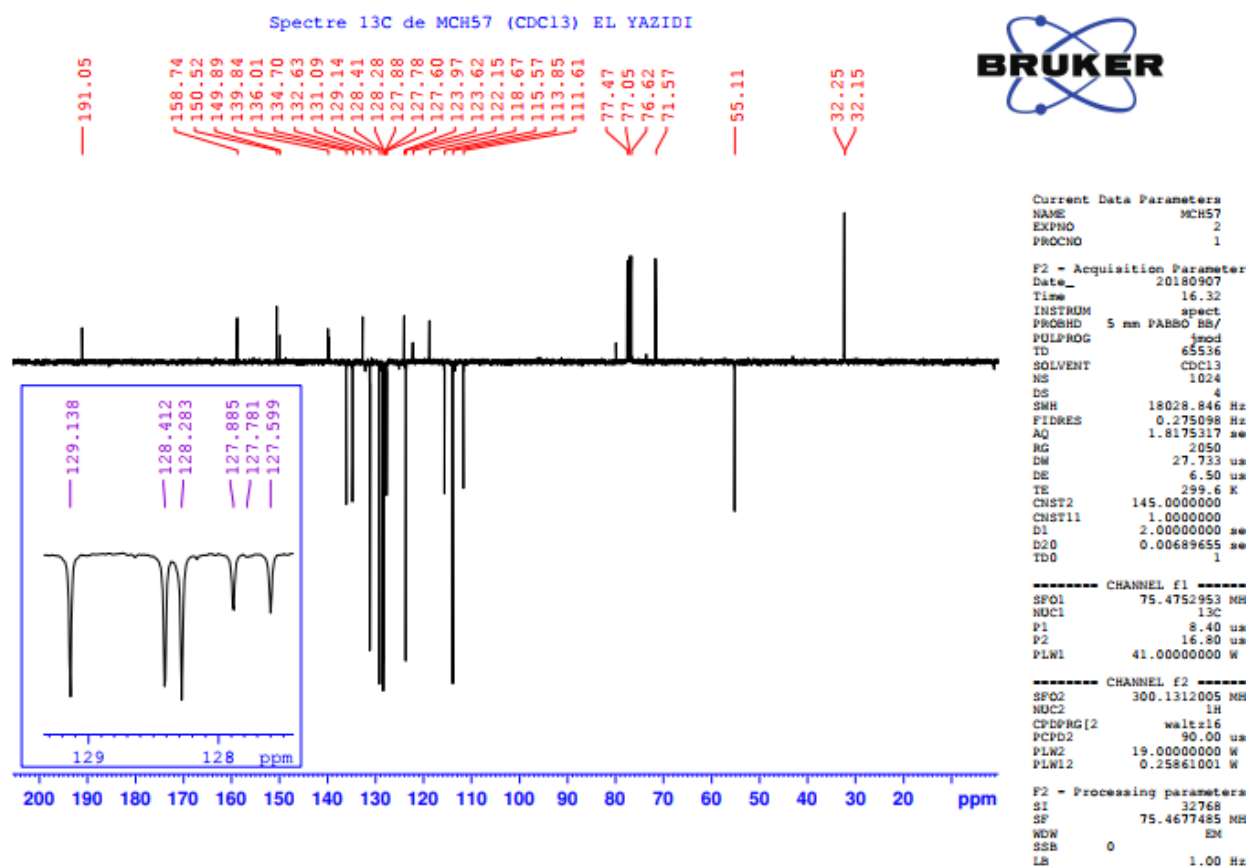

Figure S50.  $^{13}\text{C}$  NMR spectrum (75 MHz,  $\text{CDCl}_3$ ) of compound (7b)

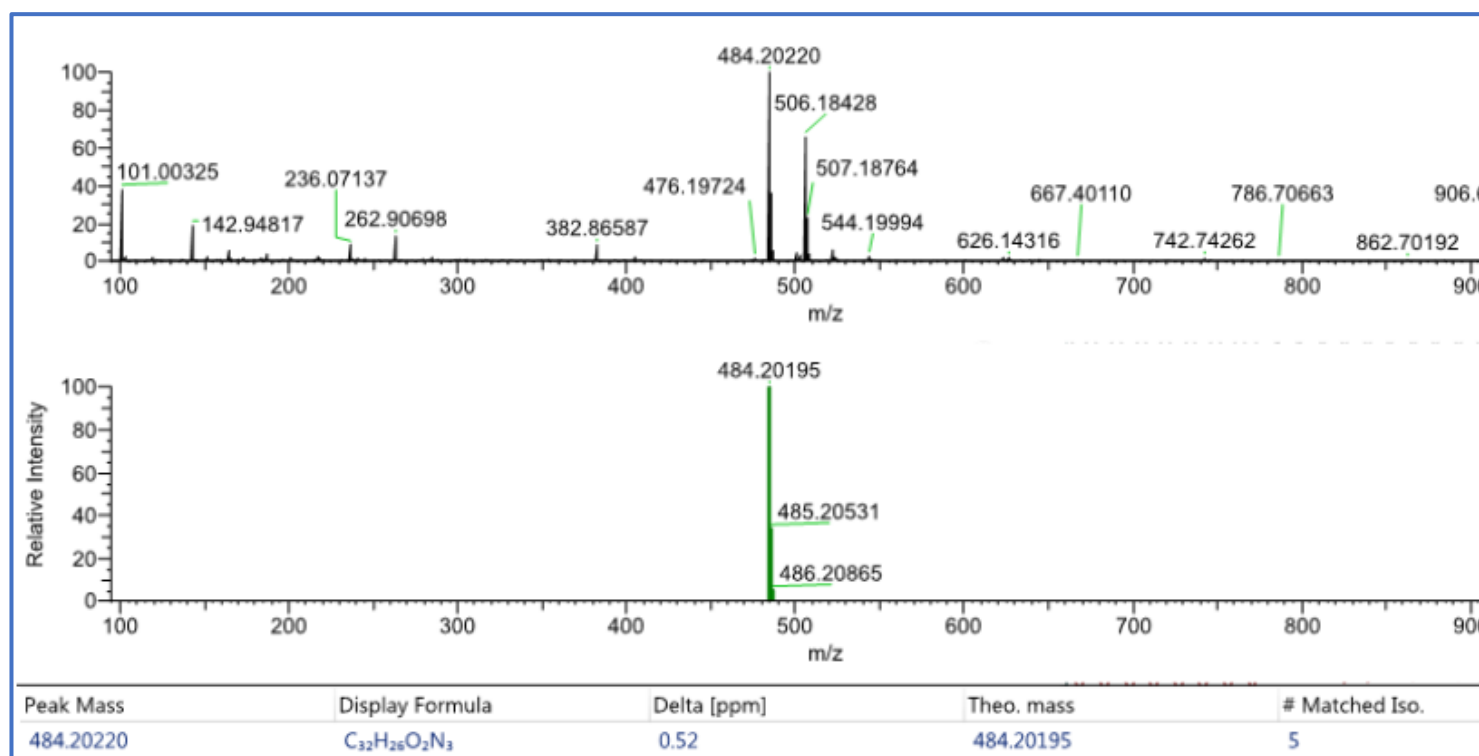

Figure S51. Mass spectrum of compound (7b)



## 1) 5-(2-methylaminobenzoyl)-1,3,4-triphenyl-1H-pyrazole (8a)

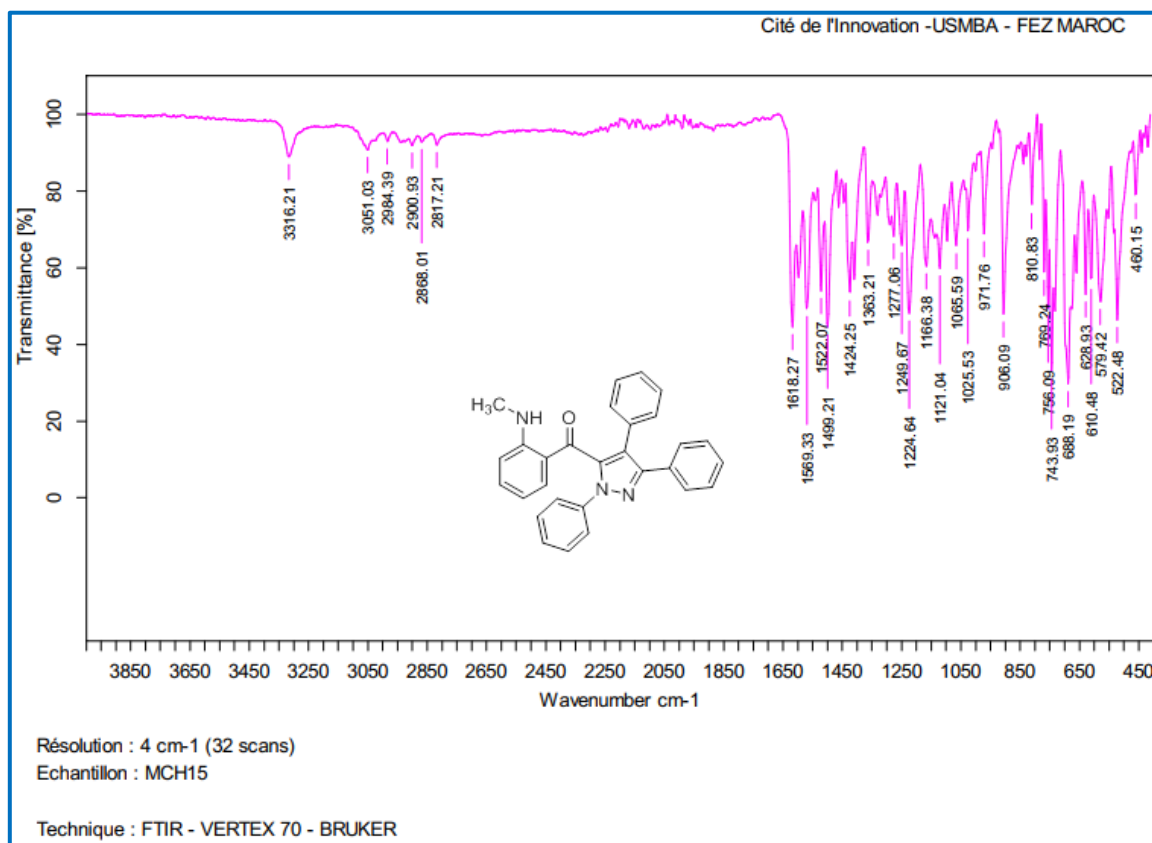

Figure S52. IR spectrum of compound (8a)

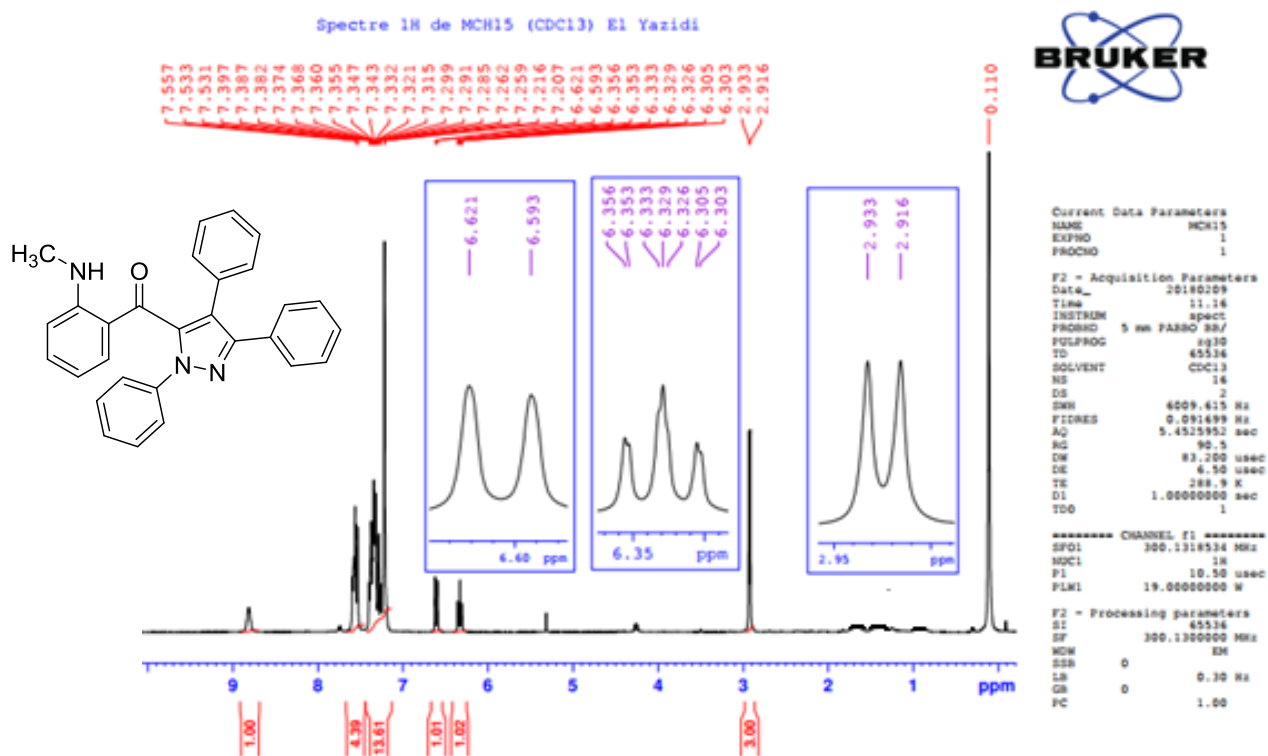Figure S53. <sup>1</sup>H NMR spectrum (300 MHz, CDCl<sub>3</sub>) of compound (8a)

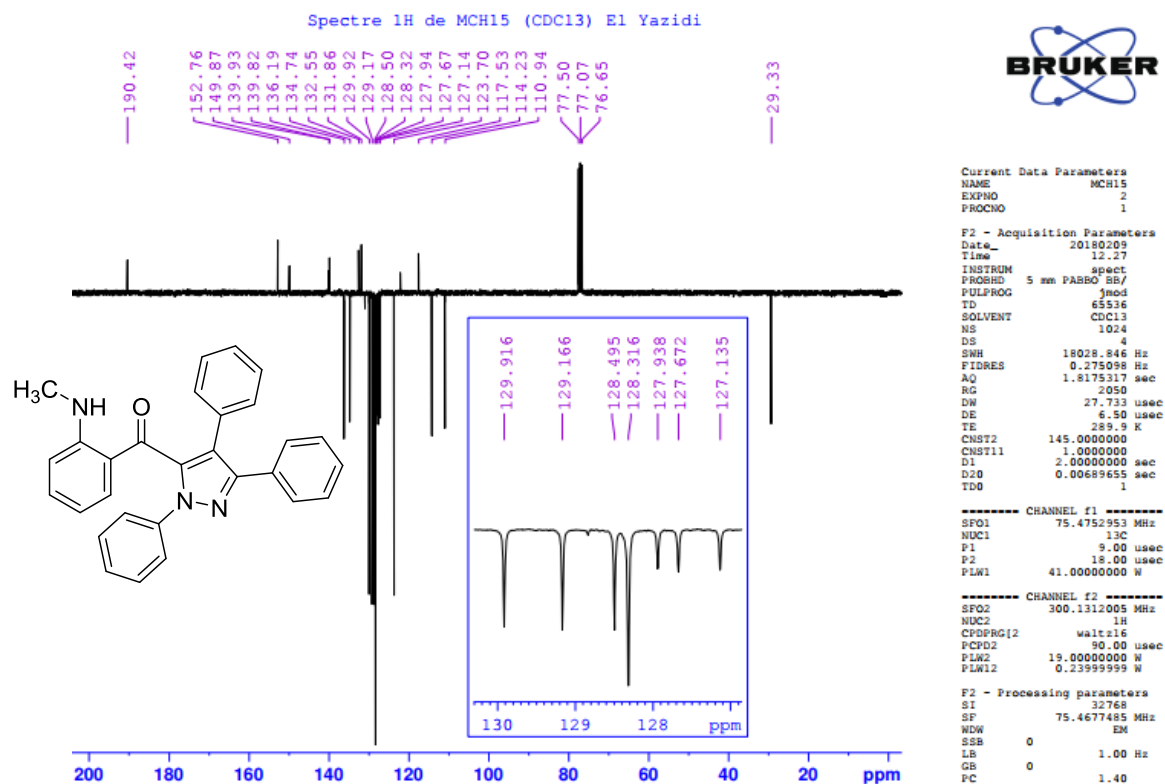

Figure S54.  $^{13}\text{C}$  NMR spectrum (75 MHz,  $\text{CDCl}_3$ ) of compound (8a)

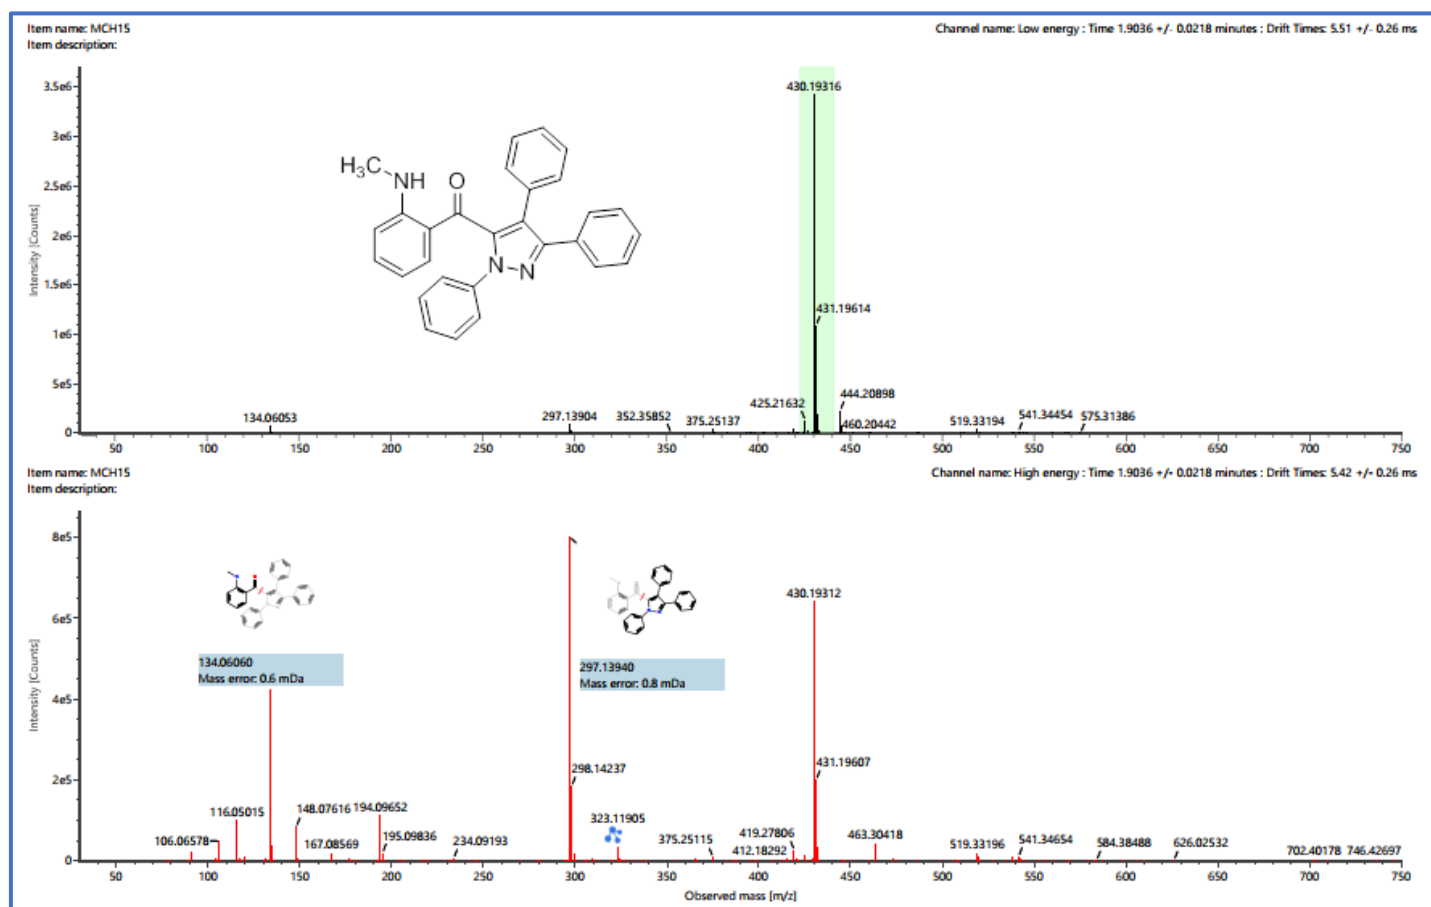

Figure S55. Mass spectrum of compound (8a)

**m) 4-(4-methoxyphenyl)-5-(2-methylaminobenzoyl)-1,3-diphenyl-1H-pyrazole (8b)**

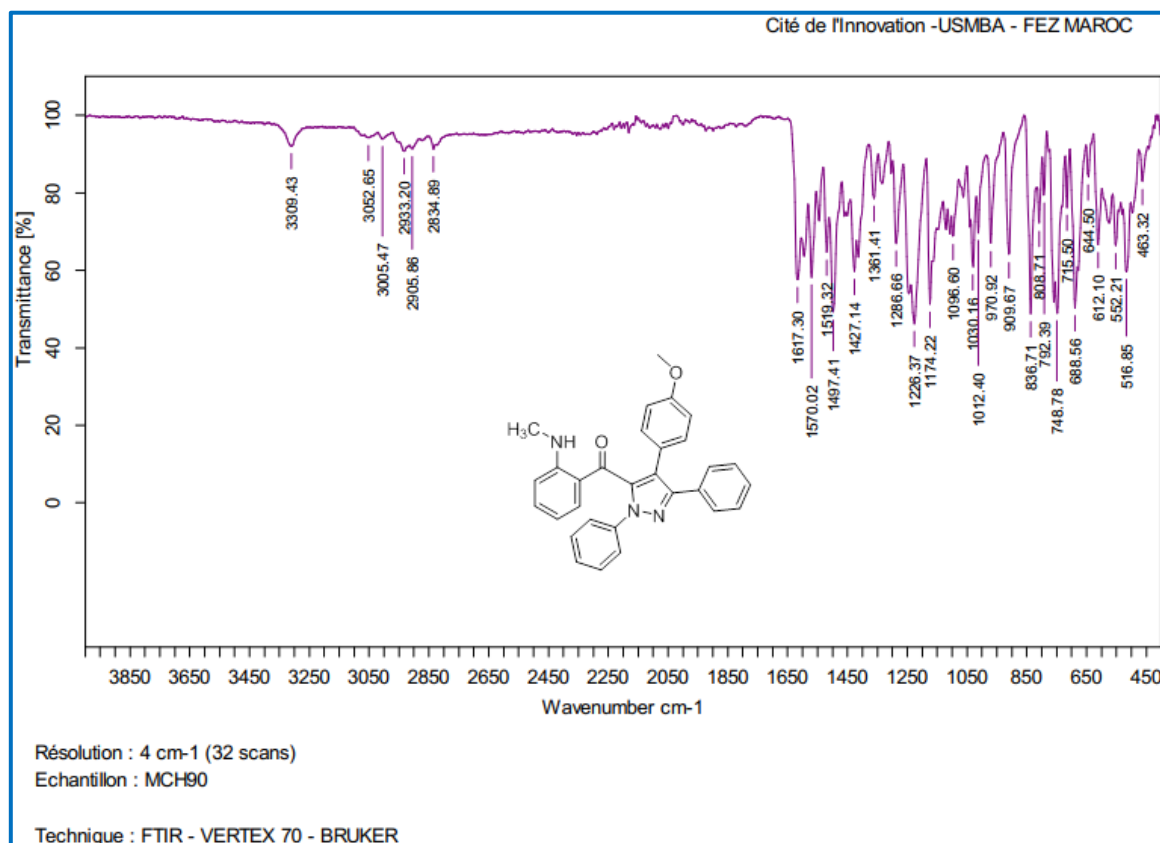

**Figure S56.** IR spectrum of compound (8b)

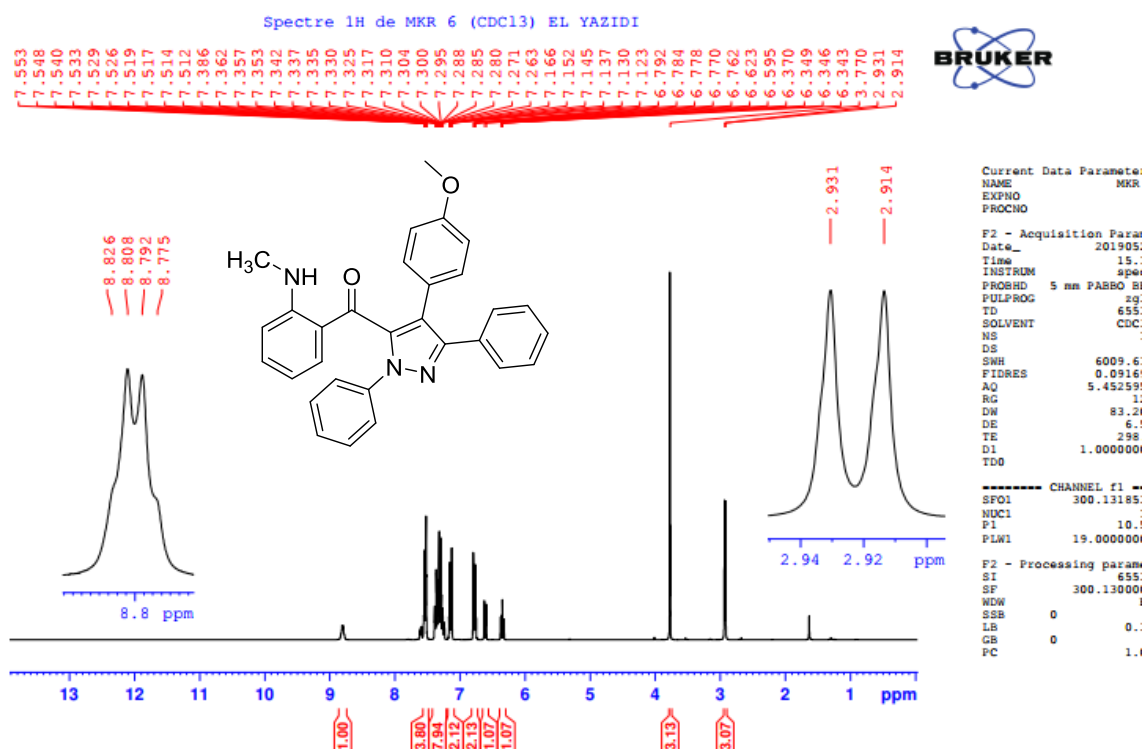

**Figure S57.** <sup>1</sup>H NMR spectrum (300 MHz, CDCl<sub>3</sub>) of compound (8b)

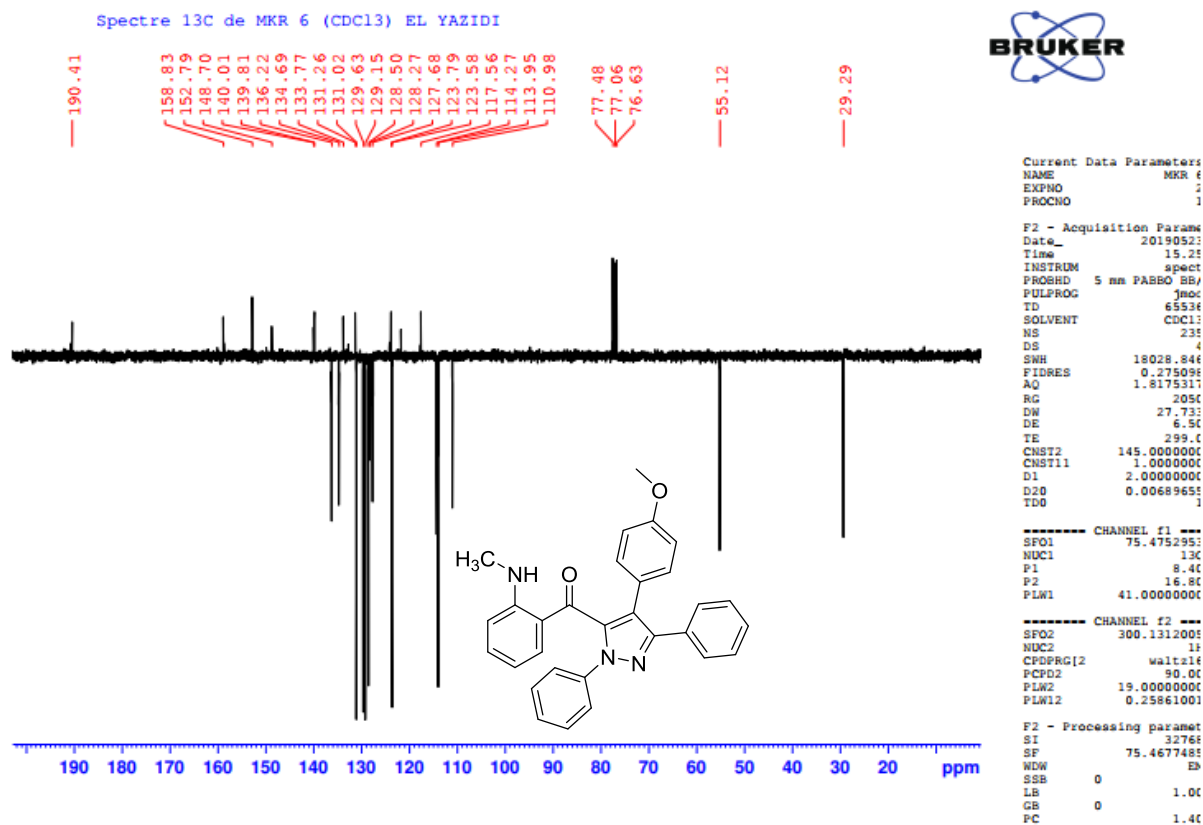

Figure S58.  $^{13}\text{C}$  NMR spectrum (75 MHz,  $\text{CDCl}_3$ ) of compound (8b)

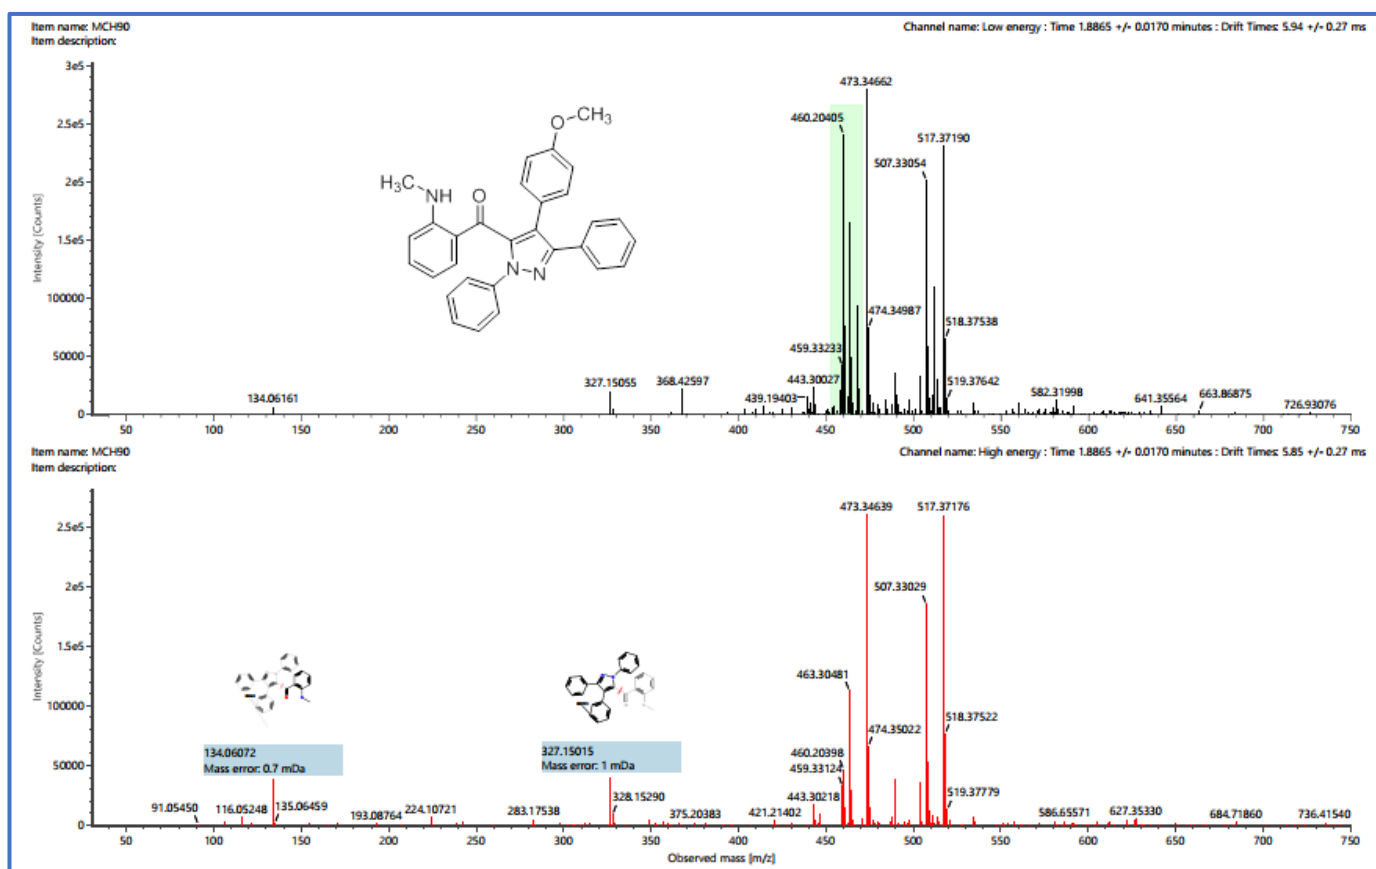

Figure S59. Mass spectrum of compound (8b)

## n) 4-(4-chlorophenyl)-5-(2-methylaminobenzoyl)-1,3-diphenyl-1H-pyrazole (8c)

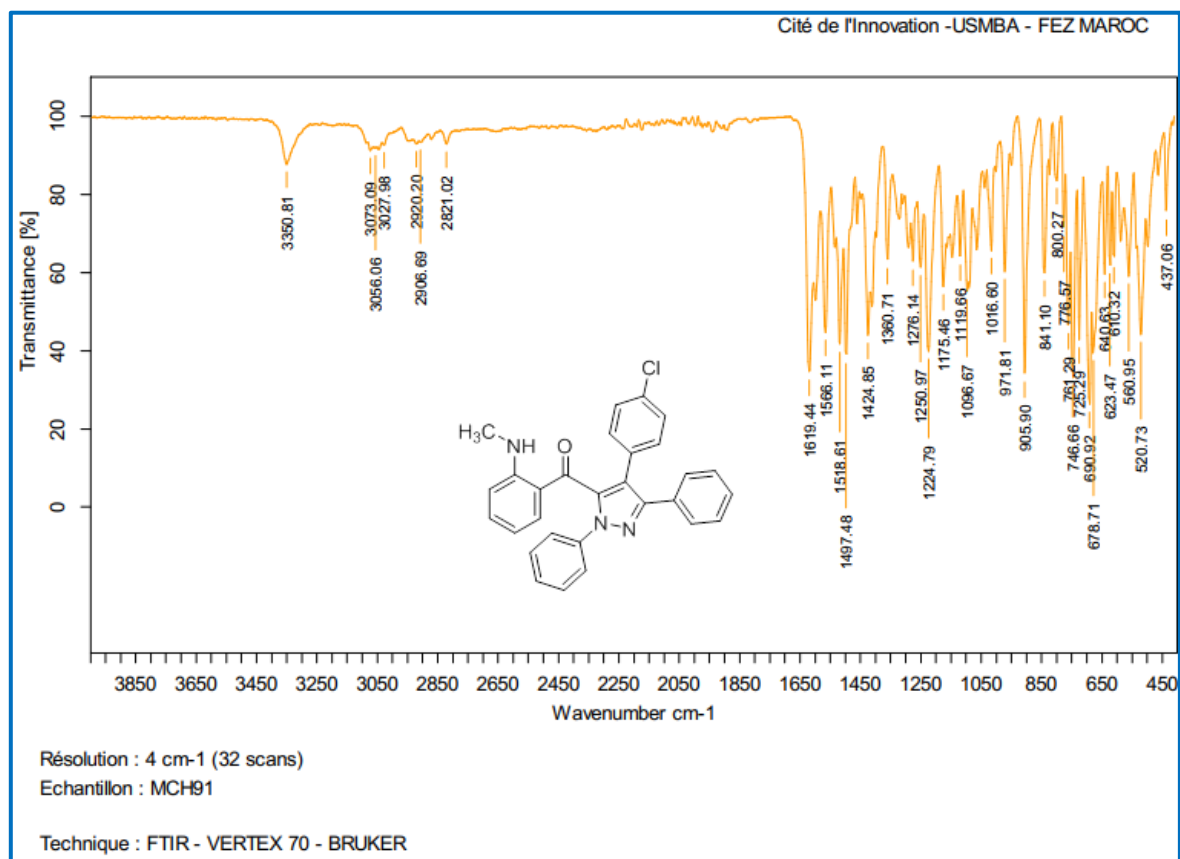

Figure S60. IR spectrum of compound (8c)

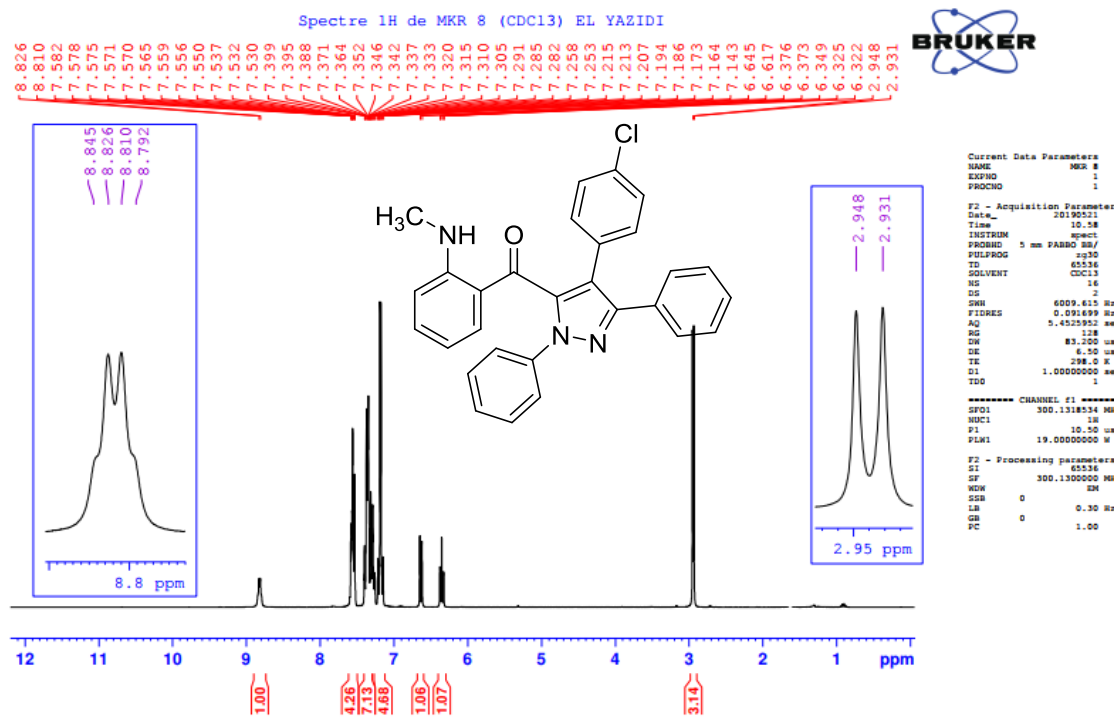Figure S61. <sup>1</sup>H NMR spectrum (300 MHz, CDCl<sub>3</sub>) of compound (8c)

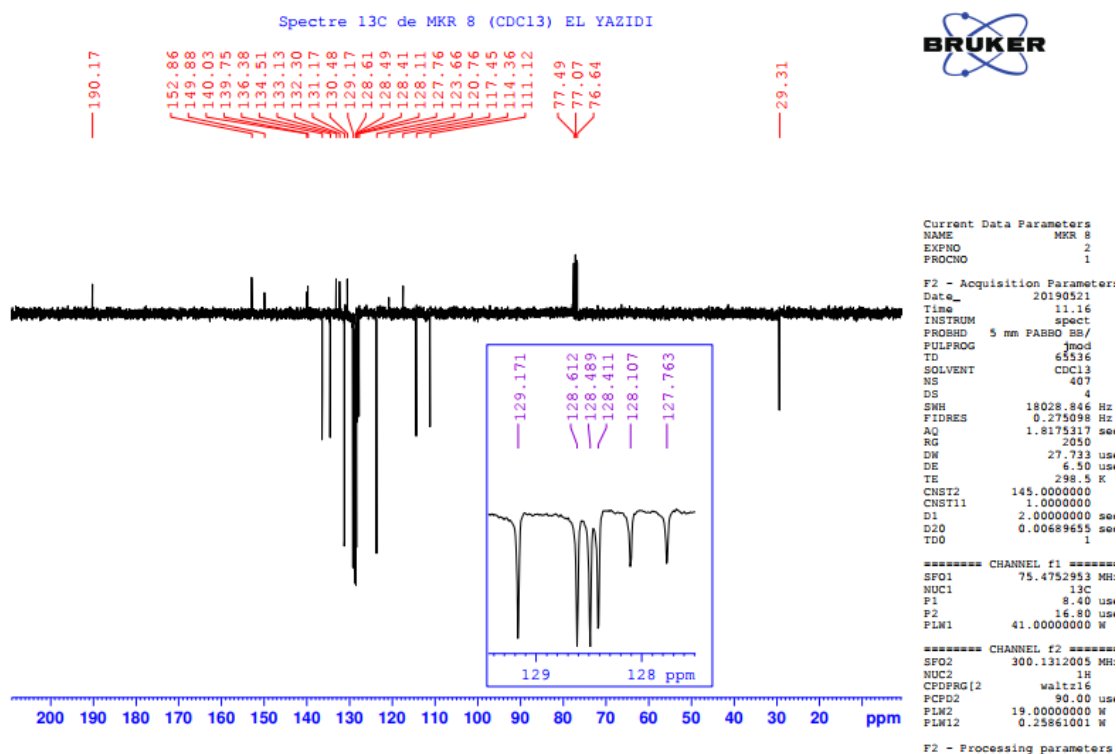

Figure S62. <sup>13</sup>C NMR spectrum (75 MHz, CDCl<sub>3</sub>) of compound (8c)

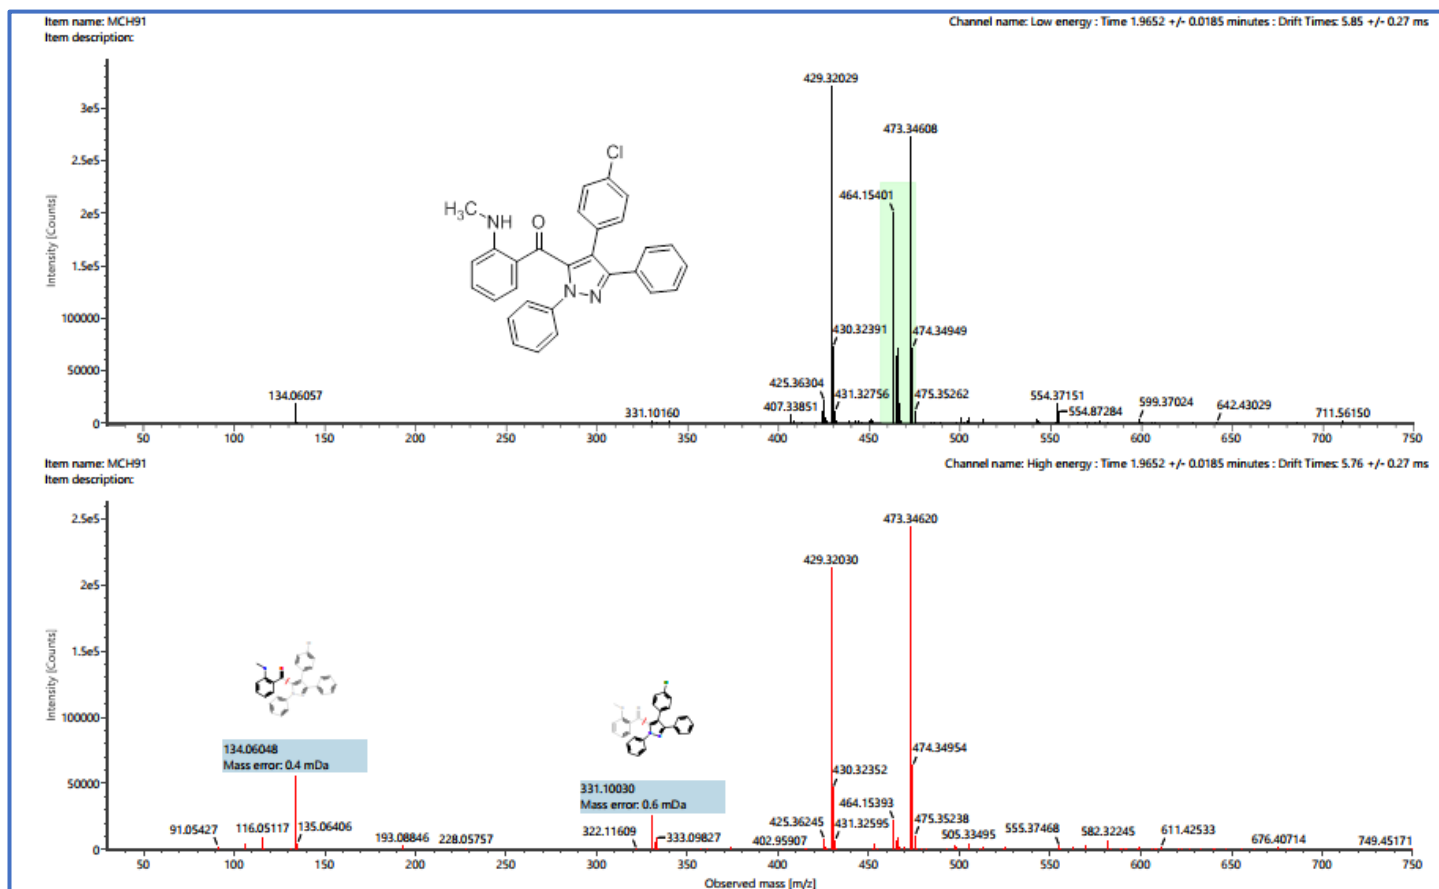

Figure S63. Mass spectrum of compound (8c)

## o) 5-(2-methylaminobenzoyl)-1,3-diphenyl-4-(p-tolyl)-1H-pyrazole (8d)

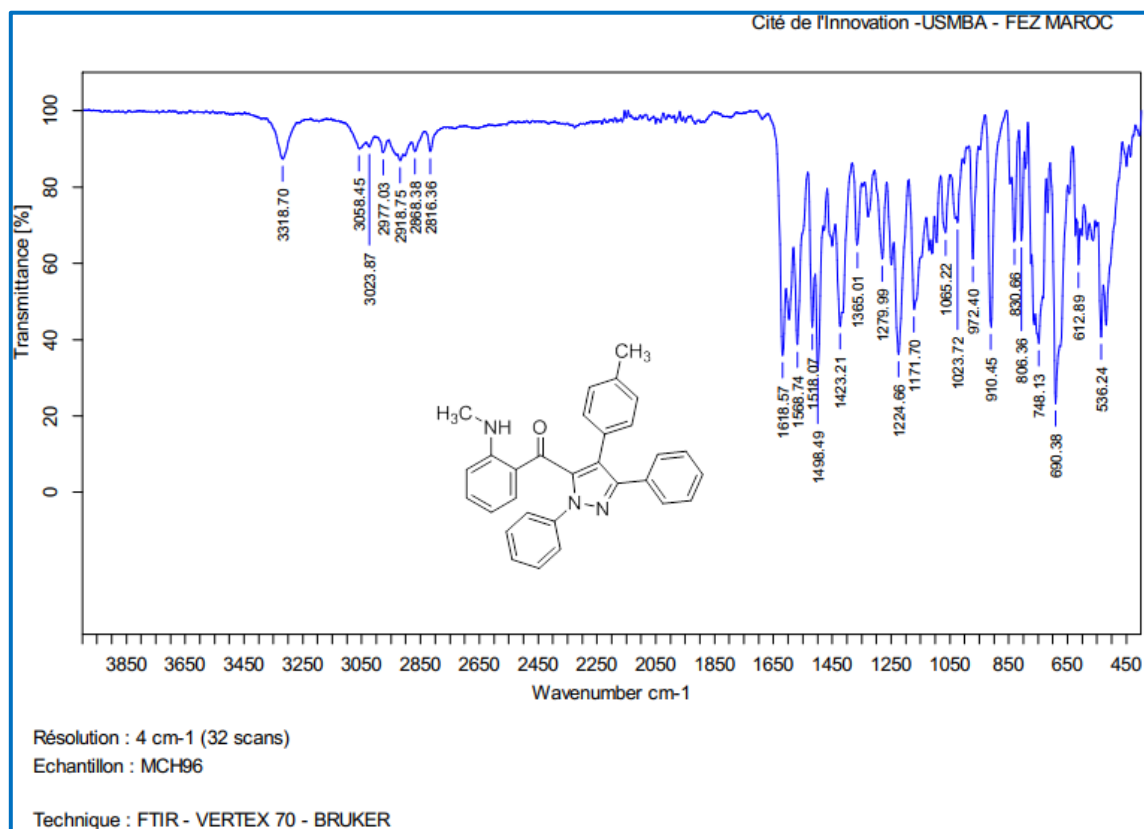

Figure S64. IR spectrum of compound (8d)

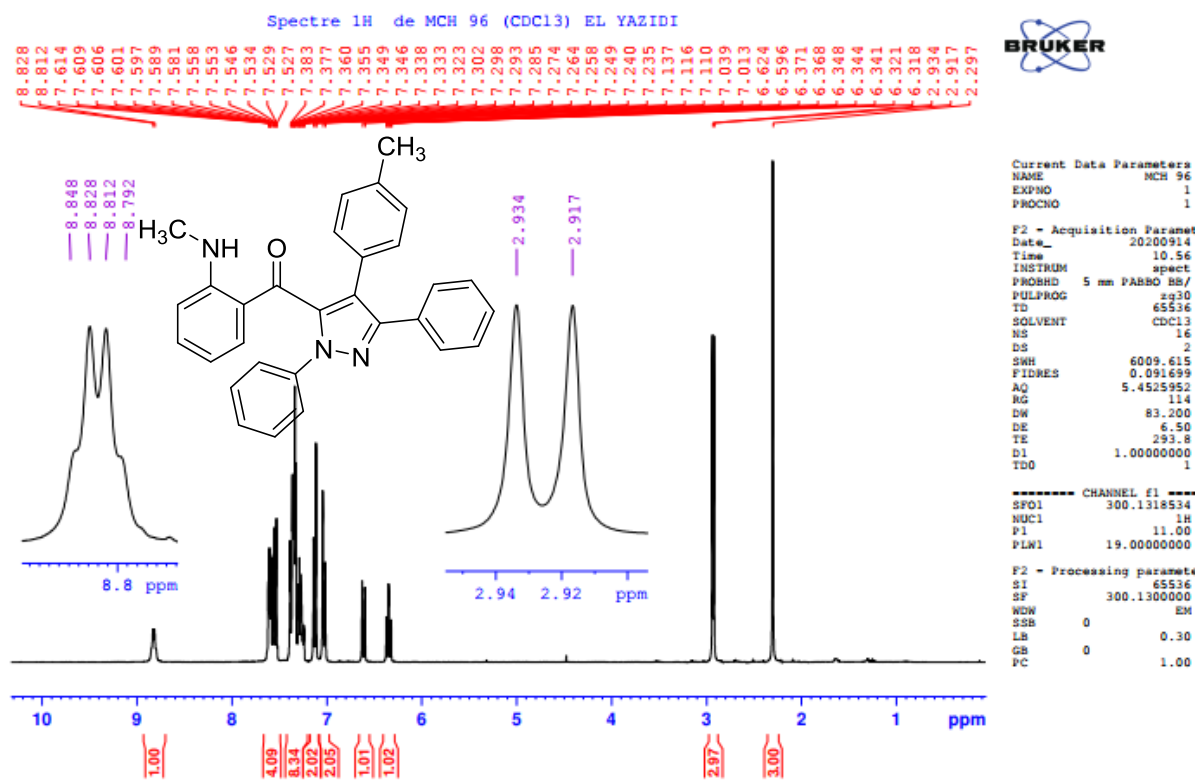Figure S65. <sup>1</sup>H NMR spectrum (300 MHz, CDCl<sub>3</sub>) of compound (8d)



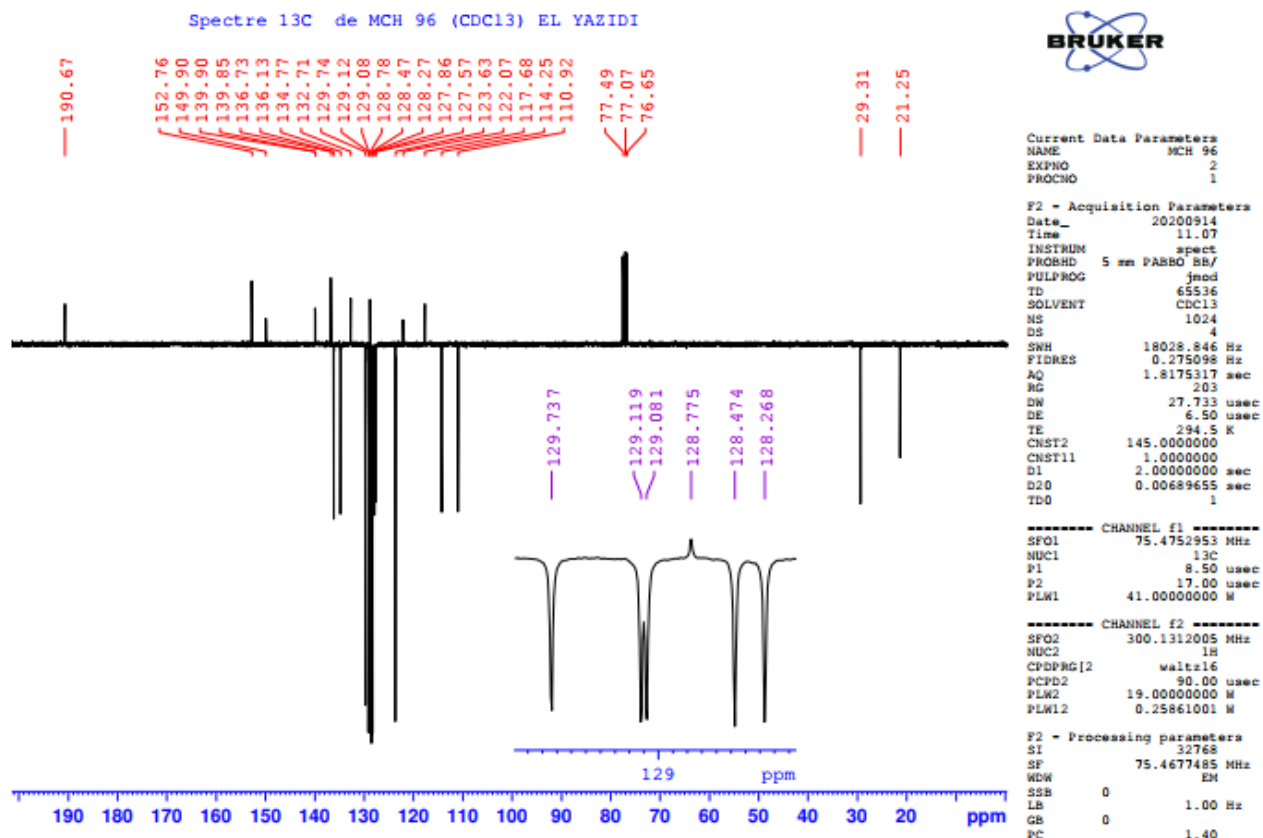

**Figure S66.**  $^{13}\text{C}$  NMR spectrum (75 MHz,  $\text{CDCl}_3$ ) of compound (**8d**)

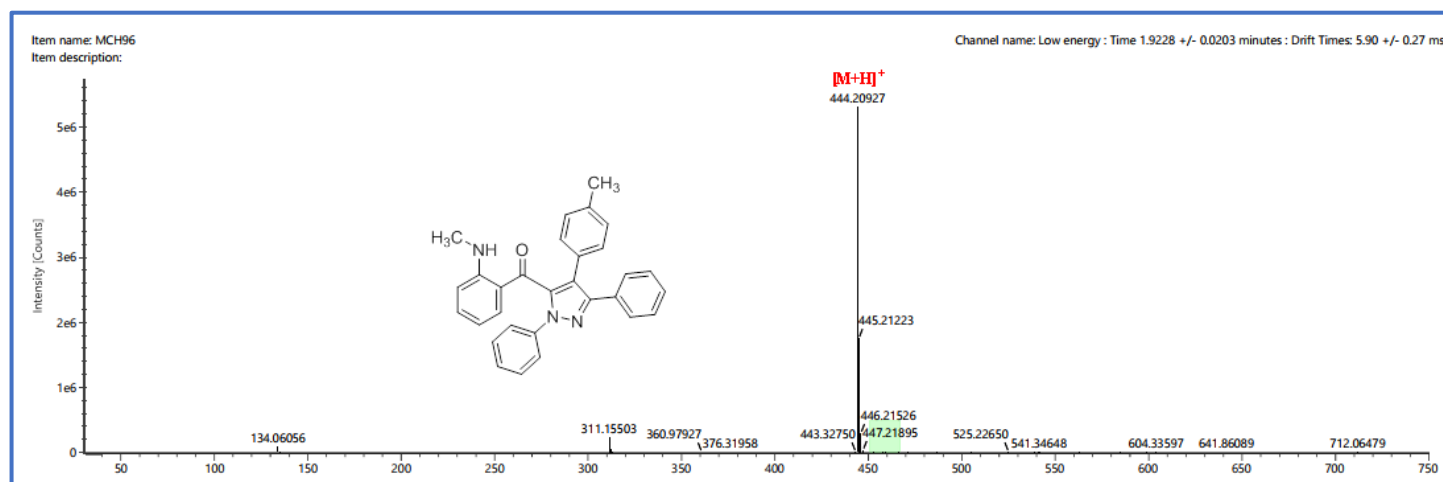

**Figure S67.** Mass spectrum of compound (**8d**)





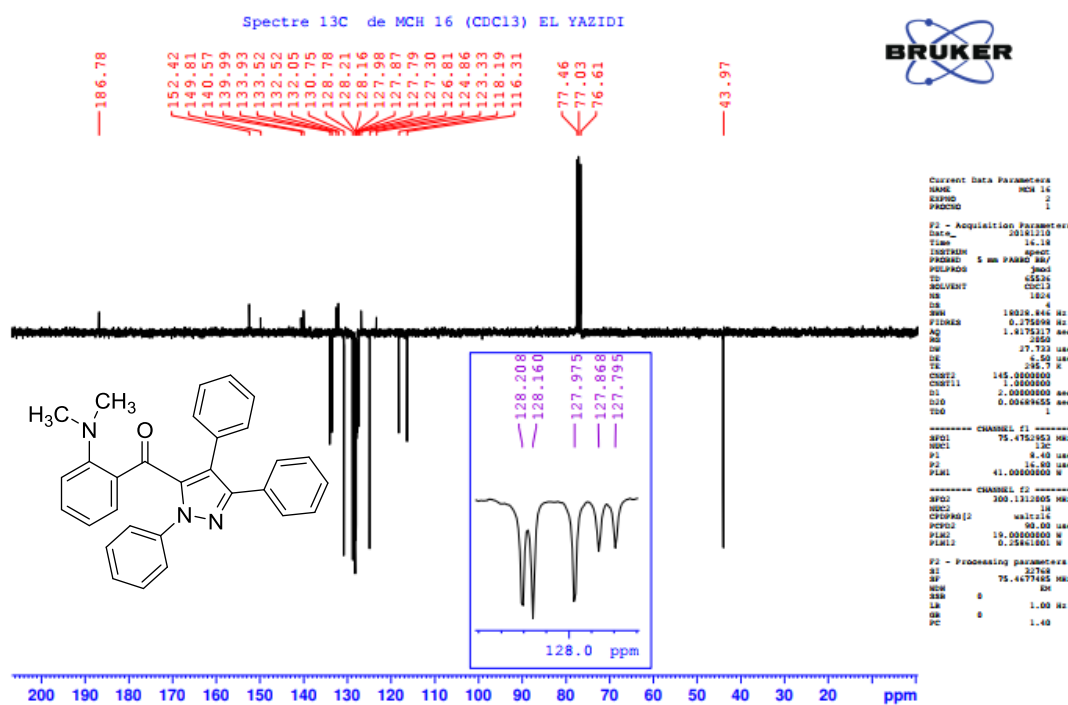

**Figure S70.**  $^{13}\text{C}$  NMR spectrum (75 MHz,  $\text{CDCl}_3$ ) of compound (**9a**)

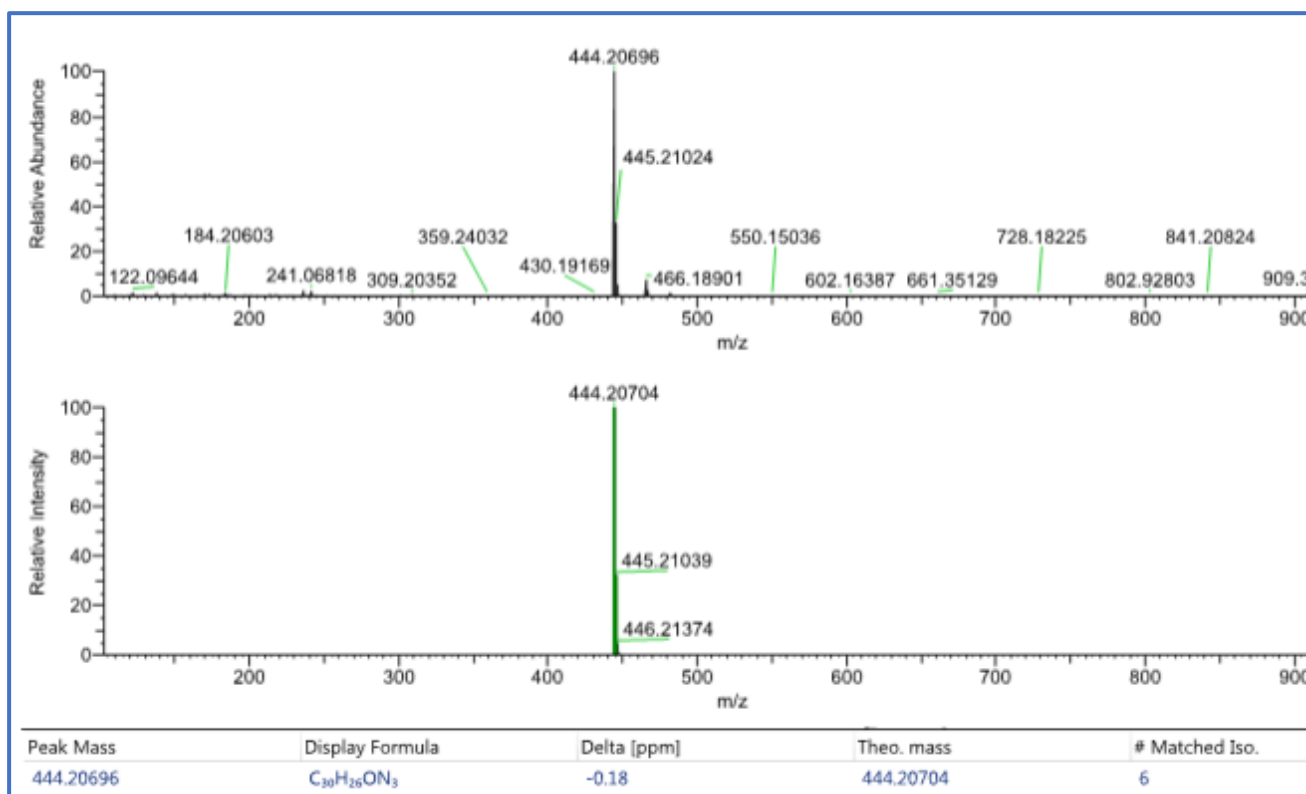

**Figure S71.** Mass spectrum of compound (**9a**)

## q) 4-(4-methoxyphenyl)-5-(2-dimethylaminobenzoyl)-1,3-diphenyl-1H-pyrazole (9b)

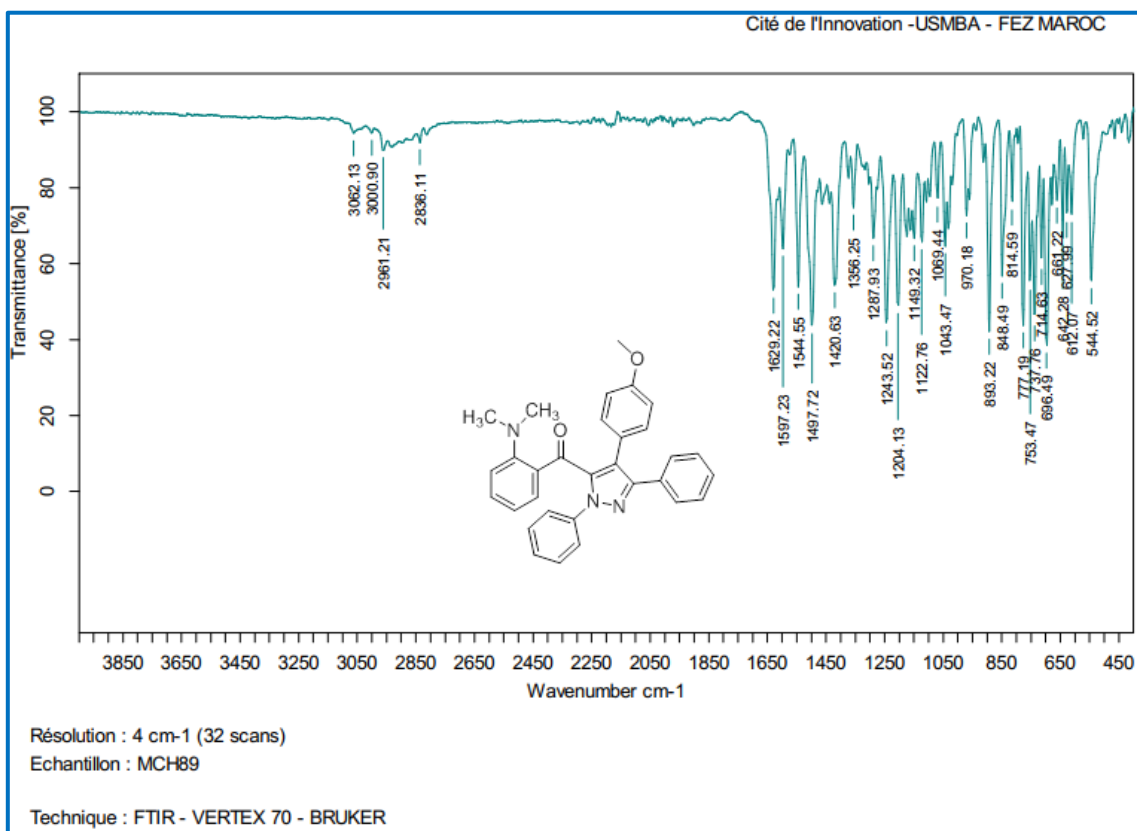

Figure S72. IR spectrum of compound (9b)

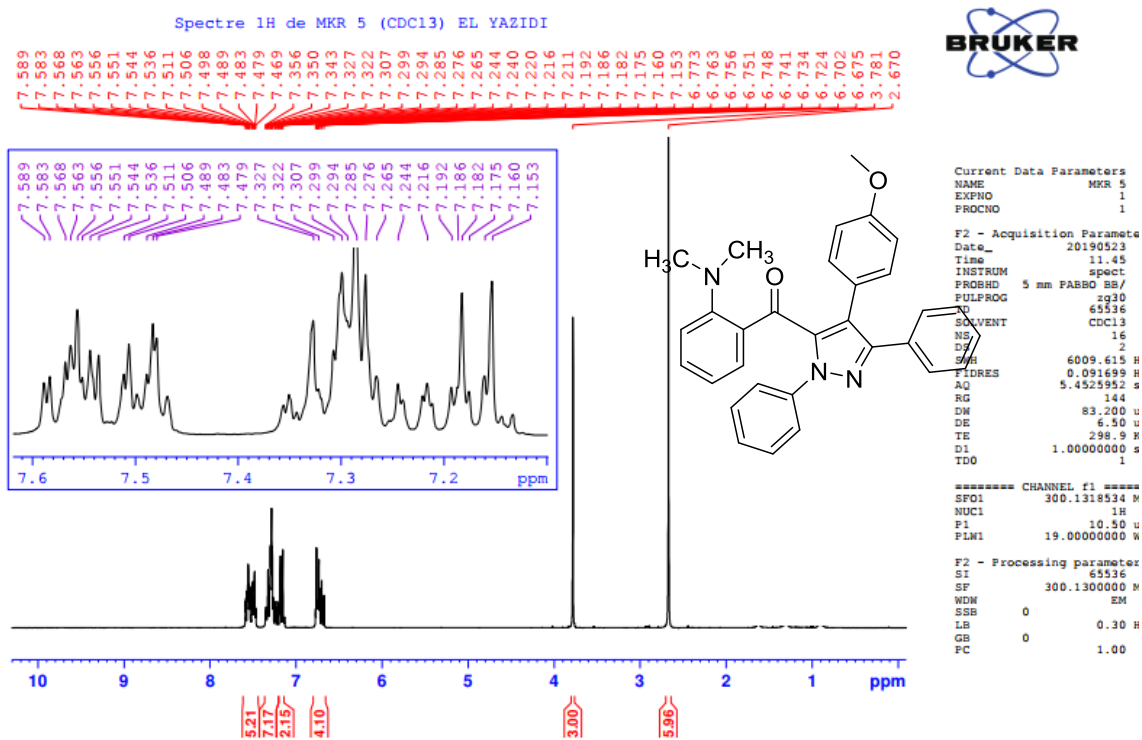Figure S73. <sup>1</sup>H NMR spectrum (300 MHz, CDCl<sub>3</sub>) of compound (9b)

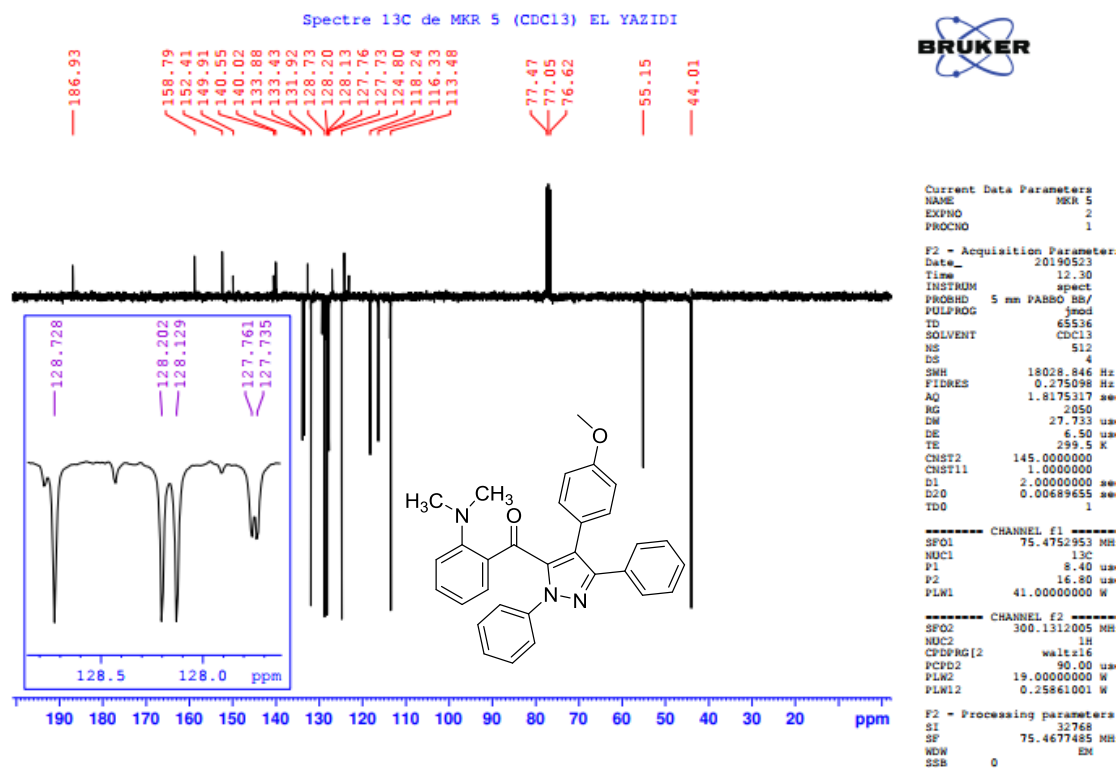

Figure S74. <sup>13</sup>C NMR spectrum (75 MHz, CDCl<sub>3</sub>) of compound (9b)

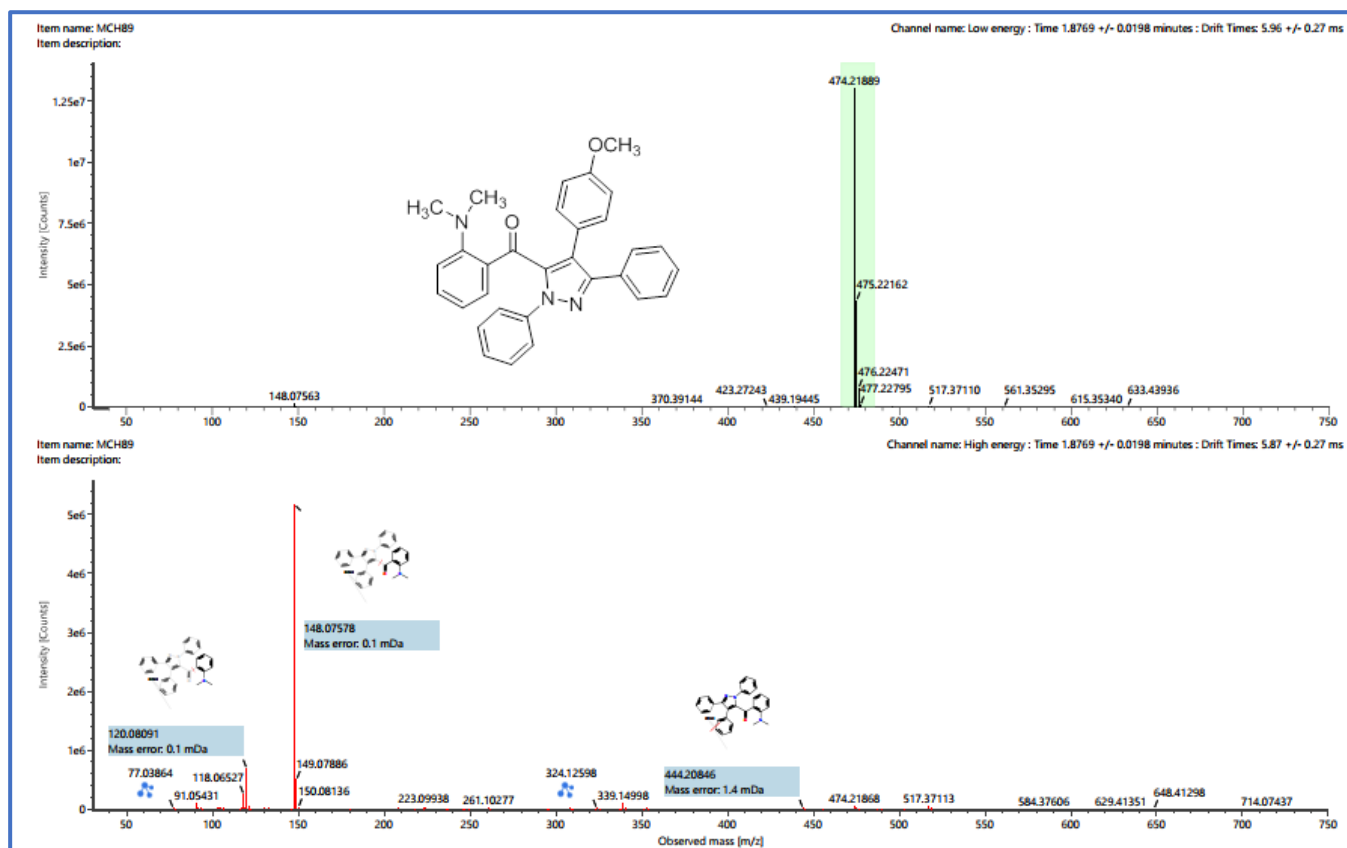

Figure S75. Mass spectrum of compound (9b)

## r) 4-(4-chlorophenyl)-5-(2-dimethylaminobenzoyl)-1,3-diphenyl-1H-pyrazole (9c)

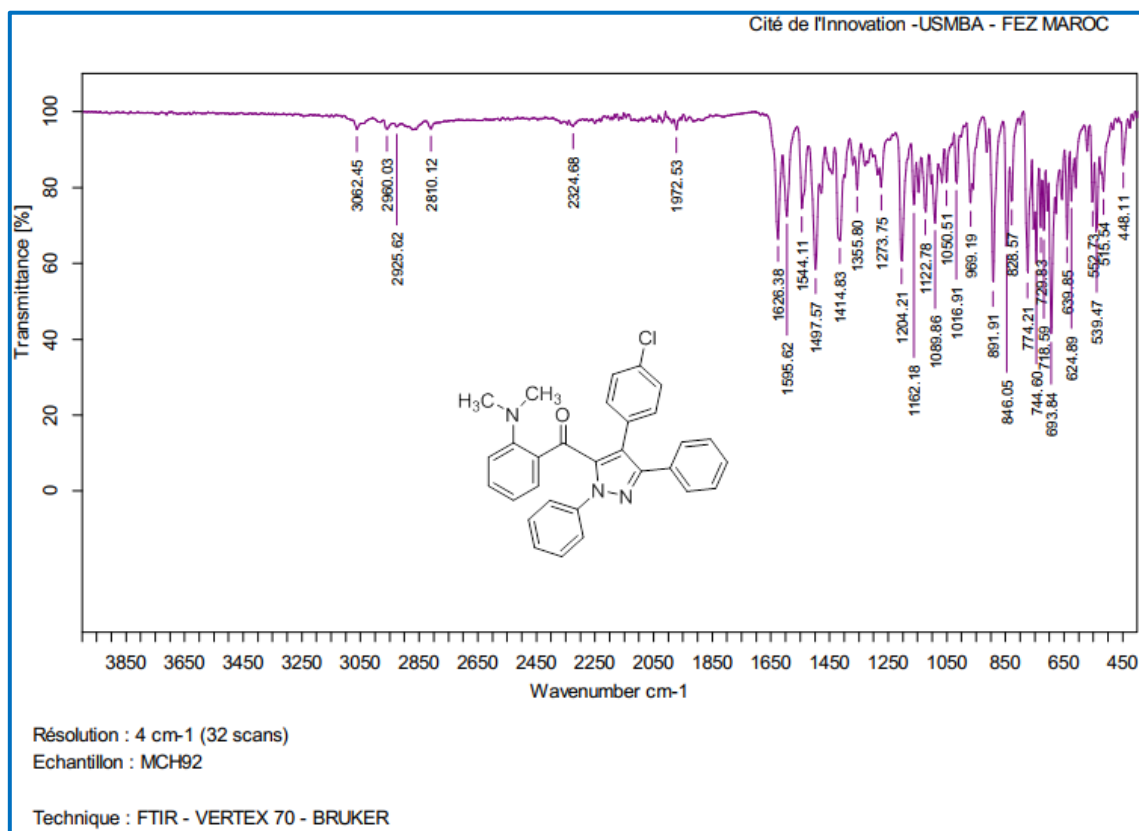

Figure S76. IR spectrum of compound (9c)

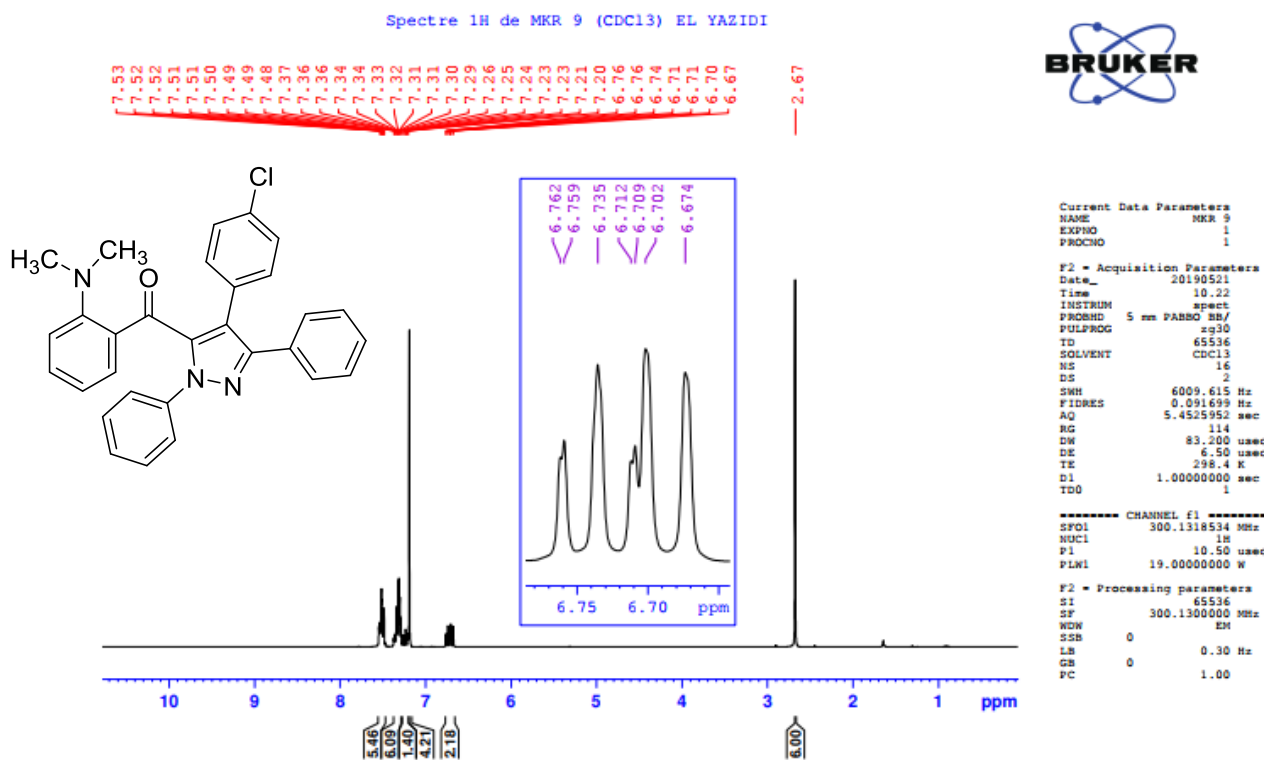Figure S77. <sup>1</sup>H NMR spectrum (300 MHz, CDCl<sub>3</sub>) of compound (9c)

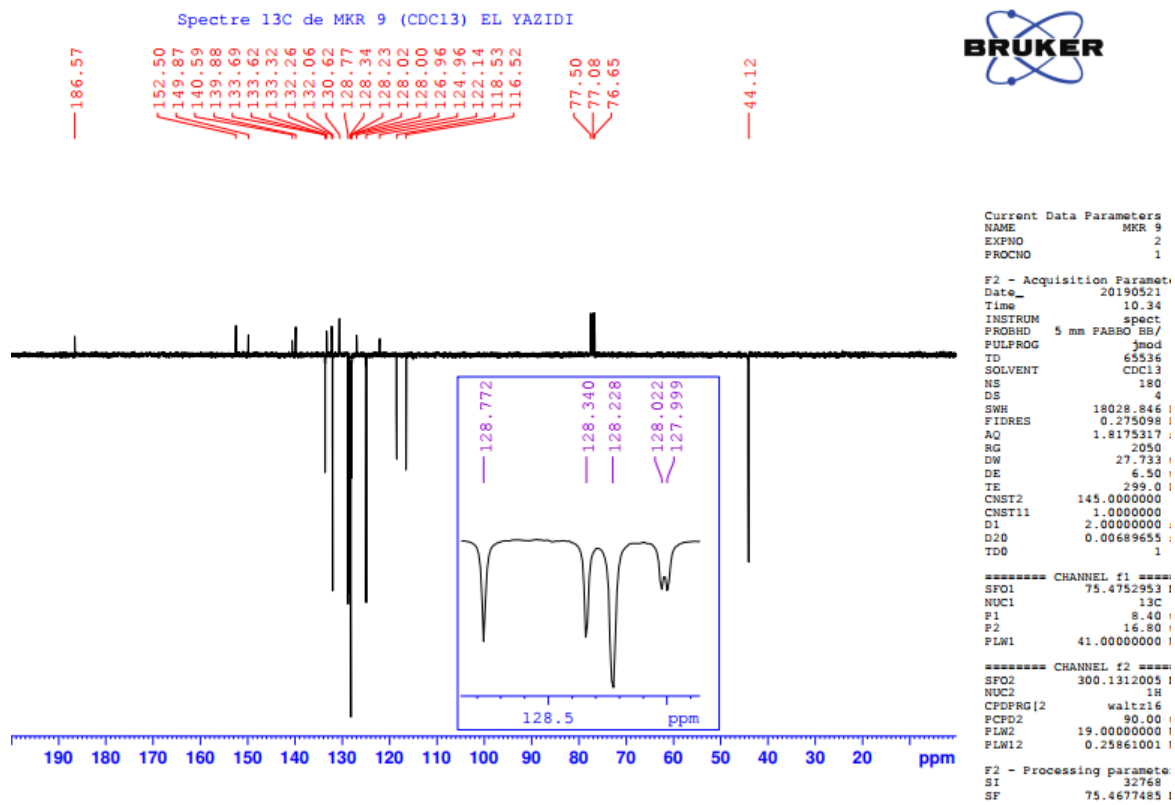

Figure S78.  $^{13}\text{C}$  NMR spectrum (75 MHz,  $\text{CDCl}_3$ ) of compound (9c)

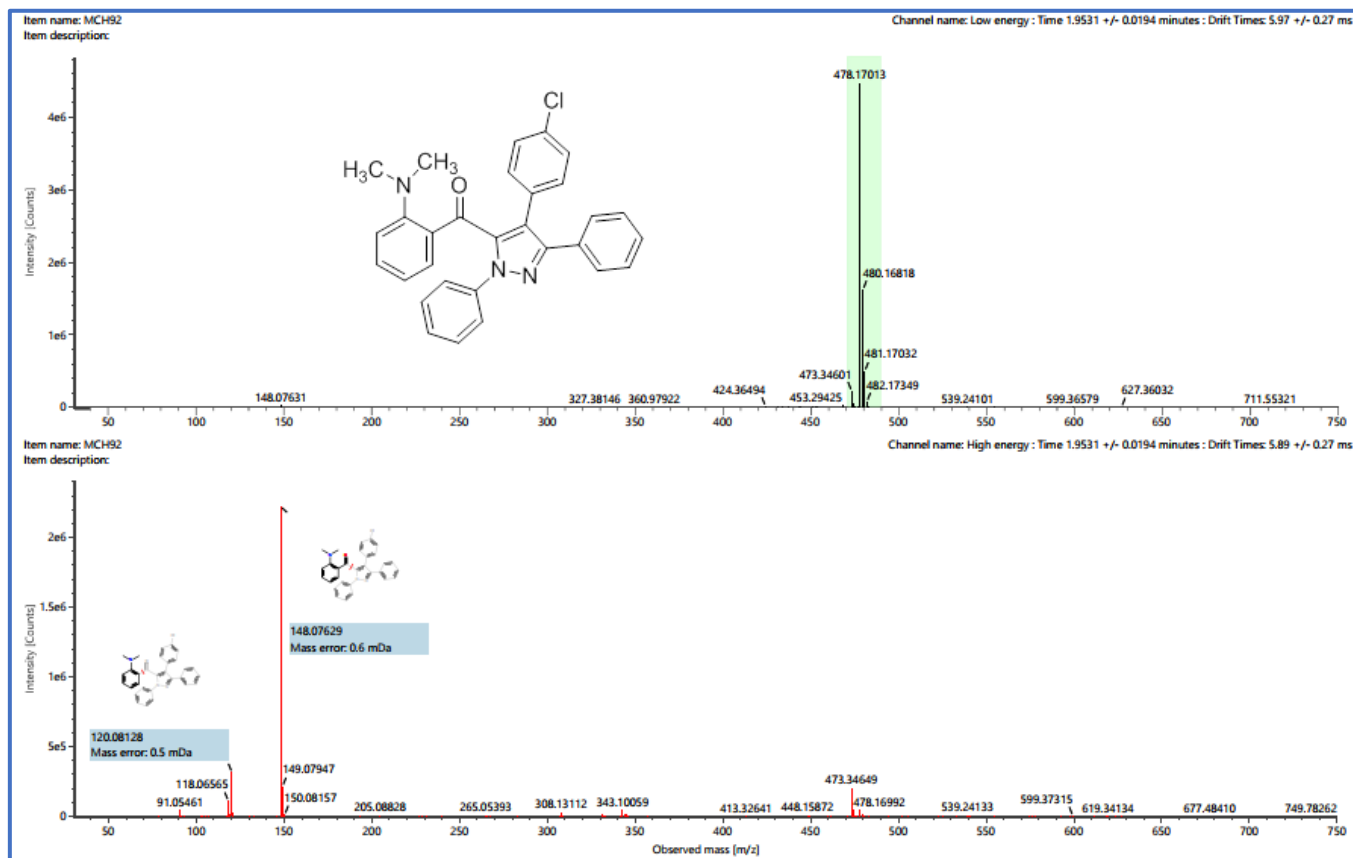

Figure S79. Mass spectrum of compound (9c)

## s) 5-(2-dimethylaminobenzoyl)-1,3-diphenyl-4-(p-tolyl)-1H-pyrazole (9d)

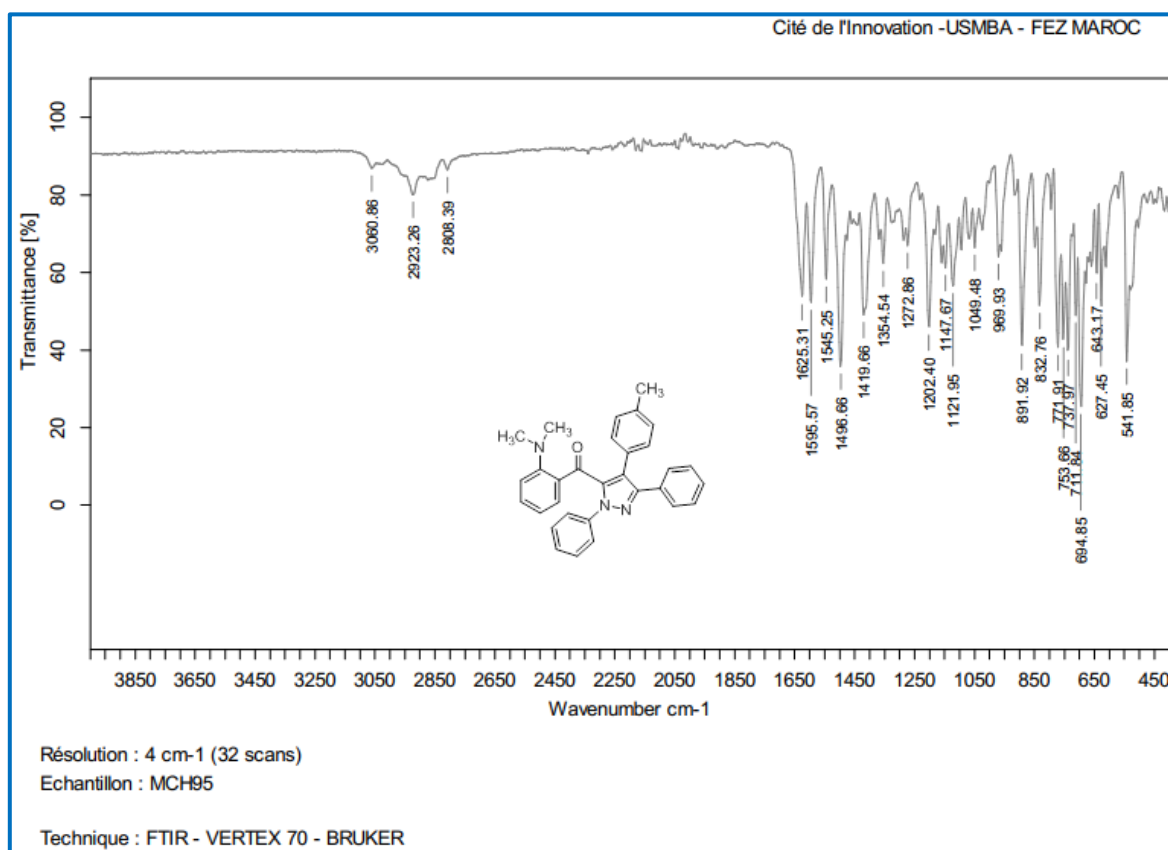

Figure S80. IR spectrum of compound (9d)

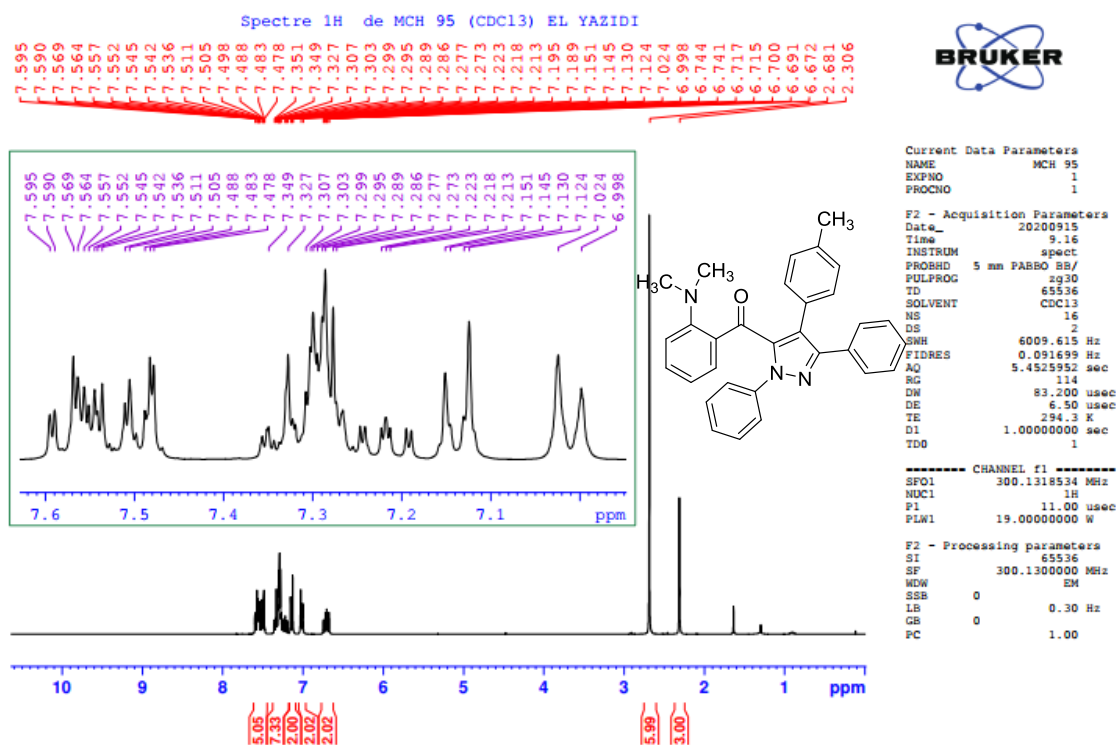Figure S81. <sup>1</sup>H NMR spectrum (300 MHz, CDCl<sub>3</sub>) of compound (9d)



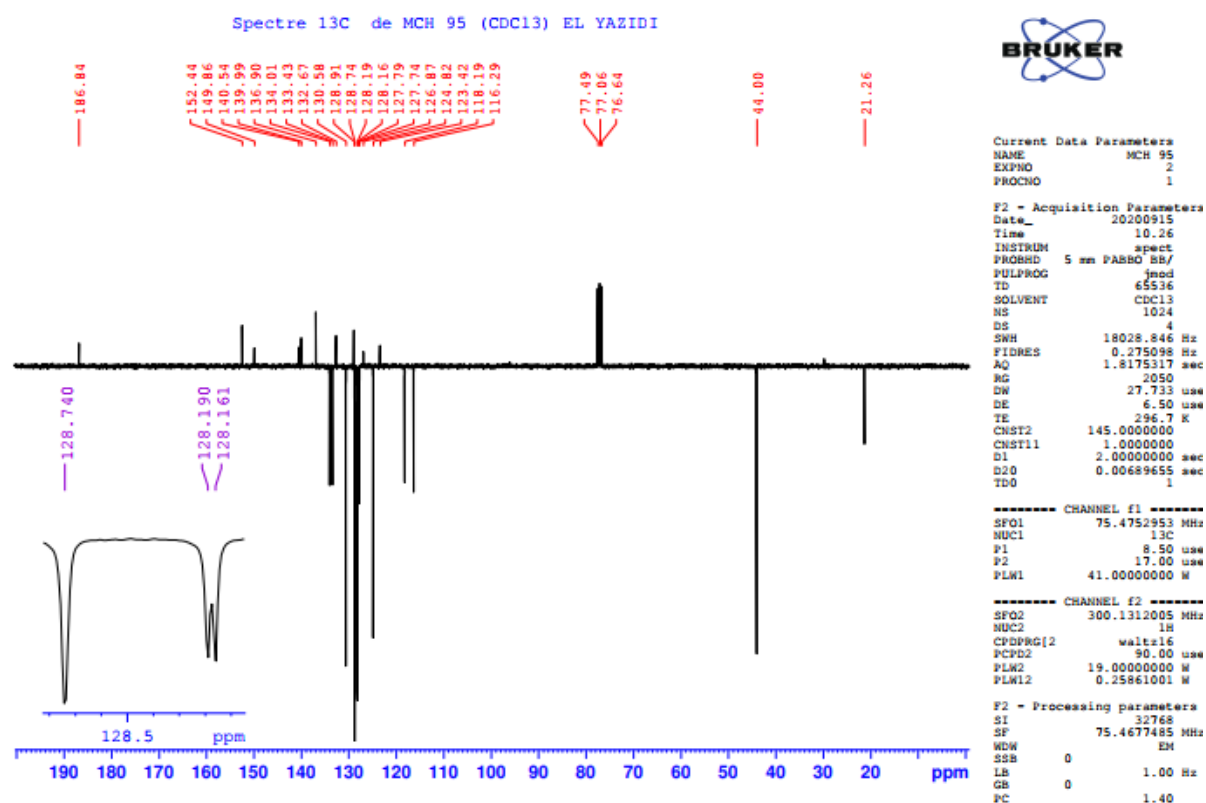

Figure S82.  $^{13}\text{C}$  NMR spectrum (75 MHz,  $\text{CDCl}_3$ ) of compound (9d)

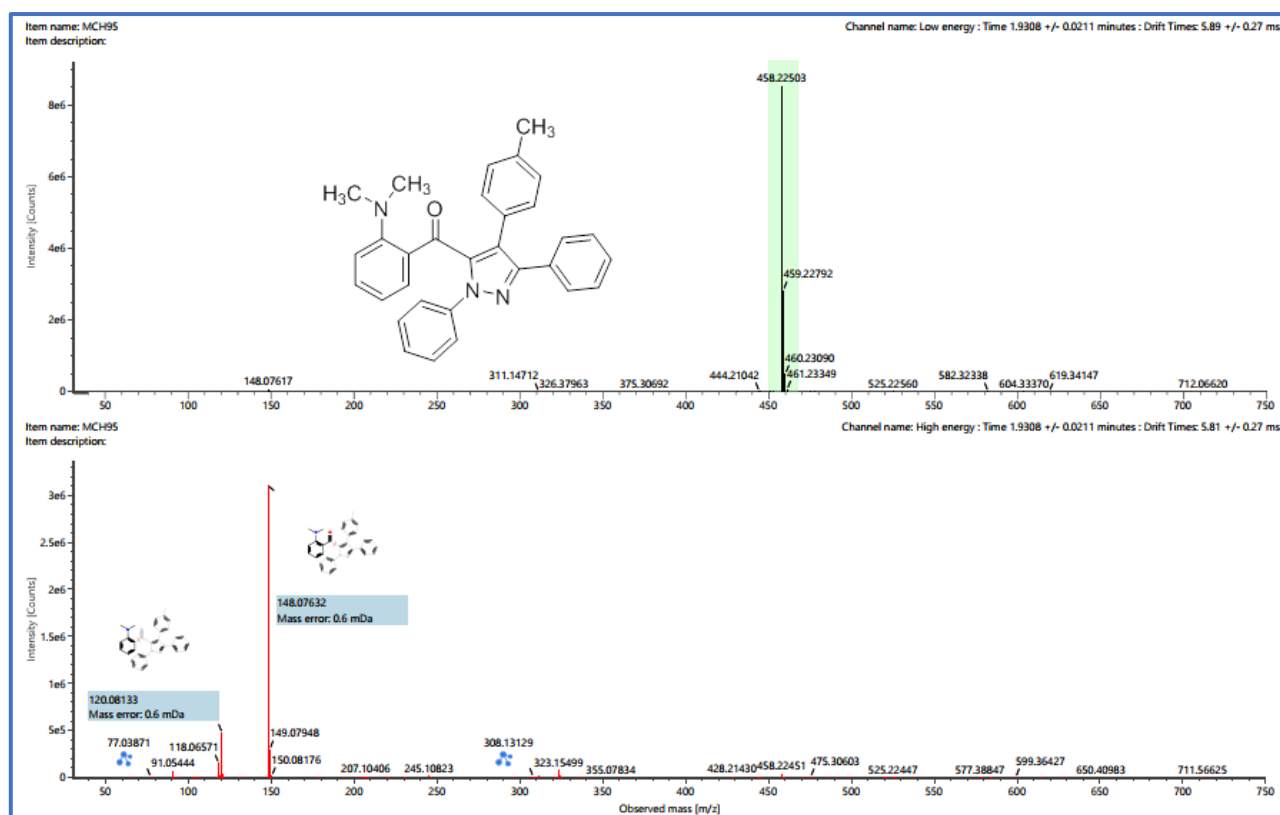

Figure S83. Mass spectrum of compound (9d)



**5. References (cited in SI):**

- S1 T. Benali, K. Habbadi, A. Khabbach, I. Marmouzi, G. Zengin, A. Bouyahya, I. Chamkhi, H. Chtibi, T. Aanniz, E. H. Achbani and K. Hammani, *Foods*, 2020, **9**, 668.
- S2 F. Moussaid, A. E. L. Barnossi, N. Chahmi and A. Iraqi Housseini, *Mater. Today Proc.*, 2019, **13**, 1049–1054.
- S3 S. D. Sarker, L. Nahar and Y. Kumarasamy, *Methods*, 2007, **42**, 321–324.
- S4 S. Shahavar Sulthana, S. Arul Antony, C. Balachandran and S. Syed Shafi, *Bioorganic Med. Chem. Lett.*, 2015, **25**, 2753–2757.
- S5 Clinical and Laboratory Standards Institute (CLSI). Reference Method for Broth Dilution Antifungal Susceptibility Testing of Yeasts; Approved Standard Third Edition. CLSI document M27-A3. Wayne, PA: Clinical and Laboratory Standards Institute, 2008.
- S6 Clinical and Laboratory Standards Institute (CLSI). Methods for Dilution Antimicrobial Susceptibility Tests for Bacteria That Grow Aerobically; Approved Standard-Ninth Edition. CLSI document M07-A9. Wayne, PA: Clinical and Laboratory Standards Institute, 2012.
- S7 F. Moussaid, Y. El Atki, A. E. L. Barnossi and A. Abdellaoui, *J. Pharm. Sci. Res.*, 2019, **11**, 718–720.
